# Supplementary material for: Hybrids of cationic [4]helicene and N-heterocyclic carbene as ligands for complexes exhibiting (chir)optical properties in the far red spectral window
Source: Royal Society of Chemistry journal article supplement (doi:10.1039/d1cc00898f), 2021-01-01
Supplement: d1cc00898f1.pdf [file d1cc00898f1.pdf]

## Hybrids of Cationic [4]Helicene and N-Heterocyclic Carbene as Ligands for Complexes Exhibiting (Chir)optical Properties in the Far Red Spectral Window

Robert Tarrieu,<sup>a</sup> Irene Hernandez Delgado,<sup>b</sup> Francesco Zinna,<sup>a,c</sup> Vincent Dorcet,<sup>d</sup> Sophie Colombel-Rouen,<sup>a</sup> Christophe Crévisy,\*<sup>a</sup> Olivier Baslé,\*<sup>a,e</sup> Johann Bosson,\*<sup>b</sup> and Jérôme Lacour \*<sup>b</sup>

### Supporting Information

---

<sup>a</sup> Univ Rennes, Ecole Nationale Supérieure de Chimie de Rennes, CNRS, ISCR - UMR 6226, F-35000 Rennes, France. Email: christophe.crevisy@ensc-rennes.fr

<sup>b</sup> Department of Organic Chemistry, University of Geneva, Quai Ernest Ansermet, 30, CH-1211 Geneva 4, Switzerland. Email: johann.bosson@unige.ch; jerome.lacour@unige.ch

<sup>c</sup> Dipartimento di Chimica e Chimica Industriale, University of Pisa, via G. Moruzzi 13, Pisa, Italy

<sup>d</sup> Univ Rennes, CNRS, ISCR - UMR 6226, F-35000 Rennes, France.

<sup>e</sup> LCC-CNRS, Université de Toulouse, CNRS, UPS, Toulouse, France. E-mail: olivier.basle@lcc-toulouse.fr

† Electronic Supplementary Information (ESI) available: experimental conditions, full characterizations of new compounds; UV-Vis, ECD, fluorescence and CPL spectra; computational details. See DOI: 10.1039/x0xx00000x. In addition, the dataset for this article can be found at the following DOI: 10.26037/yareta:526n2fl7gbe4jibfdcpbmtnpem. It will be preserved for 10 years.

## Contents

|                                                                                                       |     |
|-------------------------------------------------------------------------------------------------------|-----|
| General remarks and analysis conditions .....                                                         | S3  |
| Synthesis and characterization of new compounds .....                                                 | S4  |
| Compound <b>2</b> .H(PF <sub>6</sub> ) <sub>2</sub> : .....                                           | S4  |
| Compound <b>3</b> (PF <sub>6</sub> ): .....                                                           | S5  |
| Complex <b>4</b> (PF <sub>6</sub> ): .....                                                            | S5  |
| Complex <b>5</b> (PF <sub>6</sub> ): .....                                                            | S6  |
| Complex <b>6</b> (PF <sub>6</sub> ) <sub>2</sub> : .....                                              | S6  |
| Compound <b>A-Se</b> : .....                                                                          | S7  |
| Optical and chiroptical properties .....                                                              | S8  |
| Absorption, fluorescence, ECD and CPL spectra .....                                                   | S8  |
| Computational details .....                                                                           | S11 |
| General considerations .....                                                                          | S11 |
| Nomenclature .....                                                                                    | S11 |
| Results .....                                                                                         | S12 |
| Geometrical analysis of analogues of selenium adduct <b>3</b> (PF <sub>6</sub> ) .....                | S12 |
| Geometrical analysis of analogues of rhodium (I) complex <b>4</b> (PF <sub>6</sub> ) .....            | S13 |
| Geometrical analysis of analogues of gold (I) complex <b>5</b> (PF <sub>6</sub> ) .....               | S14 |
| Geometrical analysis of analogues of gold(III) complex <b>6</b> (PF <sub>6</sub> ) <sub>2</sub> ..... | S14 |
| Experimental and computed diastereomeric ratios .....                                                 | S15 |
| Steric and electronic parameters of <b>2</b> (PF <sub>6</sub> ) .....                                 | S15 |
| Topographical steric maps of <b>3</b> .PF <sub>6</sub> and <b>4</b> .PF <sub>6</sub> .....            | S15 |
| Electronic parameters (Tolman Electronic Parameter) .....                                             | S16 |
| X-ray structure determination .....                                                                   | S17 |
| Compound <b>3</b> (PF <sub>6</sub> ) (CCDC 2061398) .....                                             | S17 |
| Compound <b>4</b> (PF <sub>6</sub> ) (CCDC 2061397) .....                                             | S18 |
| <sup>1</sup> H, <sup>13</sup> C, <sup>19</sup> F, <sup>31</sup> P NMR spectra of new compounds .....  | S19 |
| Energies and Cartesian coordinates .....                                                              | S33 |
| ( <i>aR</i> )-(P)- <b>3</b> -(+) .....                                                                | S33 |
| TS- <b>3</b> .....                                                                                    | S34 |
| ( <i>aS</i> )-(P)- <b>3</b> -(+) .....                                                                | S35 |
| ( <i>aR</i> )-(P)- <b>3</b> -(-) .....                                                                | S36 |
| ( <i>aS</i> )-(P)- <b>3</b> -(-) .....                                                                | S37 |
| ( <i>aR</i> )-(P)- <b>4</b> .....                                                                     | S38 |
| ( <i>aS</i> )-(P)- <b>4</b> .....                                                                     | S39 |
| ( <i>aR</i> )-(P)- <b>5</b> .....                                                                     | S40 |
| ( <i>aS</i> )-(P)- <b>5</b> .....                                                                     | S41 |
| ( <i>aR</i> )-(P)- <b>6</b> .....                                                                     | S42 |
| TS- <b>6</b> .....                                                                                    | S43 |
| ( <i>aS</i> )-(P)- <b>6</b> .....                                                                     | S44 |
| References .....                                                                                      | S45 |

## General remarks and analysis conditions

### Reagents

All commercial chemicals were used as received unless otherwise noted. Cationic diaza [4]helicene **1a**(BF<sub>4</sub>) was prepared according literature procedures,<sup>1</sup> and was resolved into single enantiomers *via* Pummerer-like chemistry.<sup>2</sup> **1a**(BF<sub>4</sub>) (racemic or enantiopure) was converted into amino **1b**(BF<sub>4</sub>) in a two-step sequence (nitration then reduction) following reported procedures.<sup>3</sup> Au(C<sup>^</sup>N<sup>^</sup>C)Cl was obtained following already described procedure.<sup>4</sup> Reactions were monitored by thin-layer chromatography (TLC) carried out on silica gel plates (60F254) using UV light as visualizing agent, KMnO<sub>4</sub>/K<sub>2</sub>CO<sub>3</sub>/NaOH in water for staining. Column chromatography were performed with Silica Gel (spherical, particle size 40 μm, neutral).

### Analytical methods and apparatus

**Melting points** were measured on a standard melting point apparatus in open capillary tubes and are uncorrected. **NMR spectra** <sup>1</sup>H (400 MHz), <sup>1</sup>H (600 MHz), <sup>13</sup>C (101 MHz), <sup>13</sup>C (151 MHz), <sup>19</sup>F (376 MHz), <sup>31</sup>P (162 MHz) and <sup>77</sup>Se (76 MHz) were recorded on Bruker spectrometer with complete proton decoupling for nucleus other than <sup>1</sup>H. Variable temperature (VT) <sup>1</sup>H (500 MHz) were recorded on Bruker spectrometer. NMR Chemical shifts are reported in parts per million with the solvent resonance as the internal standard (CDCl<sub>3</sub>, <sup>1</sup>H: δ 7.26 ppm, <sup>13</sup>C: δ 77.16 ppm; CD<sub>2</sub>Cl<sub>2</sub>, <sup>1</sup>H: δ 5.32 ppm, <sup>13</sup>C: δ 53.84 ppm; Acetone-d<sub>6</sub>, <sup>1</sup>H: 2.05 ppm); <sup>19</sup>F chemical shifts are reported with CFCI<sub>3</sub> (δ = 0.0 ppm) as the internal standard; <sup>31</sup>P chemical shifts are reported with H<sub>3</sub>PO<sub>4</sub> (δ = 0.0 ppm) as the internal standard; <sup>77</sup>Se chemical shifts are reported with external KSeCN in D<sub>2</sub>O at a specific concentration with a chemical shift of -316.5 ppm (4.0 mol/L) and -329.0 ppm (0.25 mol/L). Coupling constants (J) are reported in Hertz (Hz). Multiplicities are reported using following abbreviations: s = singlet, br. s = broad singlet, d = doublet, dd = double doublet, ddd = double double doublet, dt = double triplet, t = triplet, q = quartet, quint = quintet, sept = septet, m = multiplet. **High-resolution mass spectroscopy (HMRS)** were recorded on a Q-TOF. **In situ IR** monitoring was performed on a ReactIR 45m from Mettler Toledo.

### (Chir)Optical properties

**Optical rotation** were measured on a Perkin Elmer 241 polarimeter at 20 °C using a Hg lamp (365 nm). **UV-Vis-NIR absorption spectra** were recorded on a JASCO V-650 spectrophotometer at 20°C. Measurement were performed in acetonitrile analytical grade at precise concentrations *ca.* 1 10<sup>-5</sup> M. **Electronic Circular dichroism (ECD) spectra** were recorded on a JASCO J-815 spectrophotometer at 20°C. Measurement were performed in analytical grade acetonitrile at precise concentrations *ca.* 1 10<sup>-5</sup> M. **Steady-state fluorescence spectra** were measured using a FluoroMax+ spectrofluorometer from Horiba scientific. All fluorescence spectra were corrected for the wavelength-dependent sensitivity of the detection. Fluorescence quantum yields Φ were measured in diluted solution with an optical density lower than 0.1 using the following equation:

$$\frac{\Phi_x}{\Phi_r} = \left( \frac{A_r(\lambda)}{A_x(\lambda)} \right) \left( \frac{n_x^2}{n_r^2} \right) \left( \frac{D_x}{D_r} \right)$$

where A is the absorbance at the excitation wavelength (λ), n the refractive index and D the integrated intensity. “r” and “x” stand for reference and sample. The fluorescence quantum yields were measured relative to cresyl violet in methanol (Φ = 0.54). Excitations of reference and sample compounds were performed at the same wavelength.

**Circularly polarized luminescence (CPL) spectra** were recorded with a home-made instrument,<sup>5</sup> on 10<sup>-5</sup> M acetonitrile solutions under 517 nm irradiation from a LED source. A 90° geometry between excitation and detection was employed.

## Synthesis and characterization of new compounds

### Compound **2.H(PF<sub>6</sub>)<sub>2</sub>**:

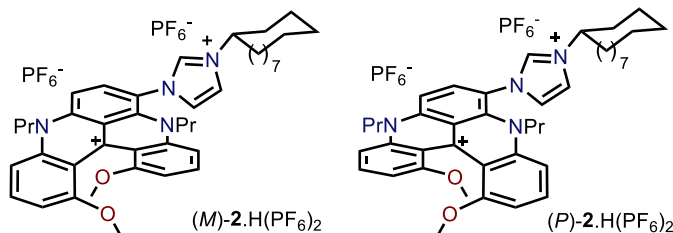

In a microwave tube (10 mL) were placed (*rac*)-**1b**(BF<sub>4</sub>) (100 mg, 0.19 mmol, 1.0 equiv.), cyclododecylamine (36 mg, 0.19 mmol, 1.0 equiv.), MgSO<sub>4</sub> (47 mg, 0.39 mmol, 2 equiv.) and acetic acid (300 μL) then the mixture was heated at 60 °C for 5 min. To the green homogeneous mixture, glyoxal (24 μL, 0.21 mmol, 1.1 equiv., 40 % weight in aqueous solution), ZnCl<sub>2</sub> (235 μL, 0.235 mmol, 1.2 equiv., 1M in Et<sub>2</sub>O) and formaldehyde (16 μL, 0.21 mmol, 1.1 equiv., 37 % weight in aqueous solution) were successively added. The tube was sealed with a septum and the resulting mixture was stirred at 60 °C for 1 hour then cooled down to room temperature. An aliquot of the crude reaction mixture was taken and a <sup>1</sup>H NMR was recorded to determine the selectivity of the reaction, which was calculated by integration of characteristic signals of the different compounds (cf NMR <sup>1</sup>H - Selectivity). The solvent was removed under reduced pressure and the crude mixture (diluted in a 1/1: milli-Q water / acetone solution) was loaded on an anion exchange resin Dowex<sup>®6</sup> (minimum 1.9 cm of resin for 0.19 mmol of acetate salt) and eluted with milli-Q water / acetone (1/1). The solvents were evaporated under reduced pressure, then KPF<sub>6</sub> (107 mg, 0.58 mmol, 3 equiv.), CH<sub>2</sub>Cl<sub>2</sub> (25 mL) and water (5 mL) were added and the mixture was stirred at room temperature for 1 hour. The organic layer was separated, and the aqueous layer was extracted with 3 x 25 mL of CH<sub>2</sub>Cl<sub>2</sub>. The organic layers were combined, dried over magnesium sulfate, filtered and the solvent was evaporated under reduced pressure. The mixture was purified by flash chromatography on silica gel (eluent: CH<sub>2</sub>Cl<sub>2</sub>/MeOH: 98/2, R<sub>f</sub> = 0.24) to afford the desired imidazolium salt **2.H(PF<sub>6</sub>)<sub>2</sub>** as a dark green solid (138 mg, 76%). **m.p.** = 166 °C. <sup>1</sup>H NMR (600 MHz, CDCl<sub>3</sub>) δ 9.24 (br. s, 1H), 8.21 (d, J = 9.3 Hz, 1H), 8.05 (dd, J = 8.9, 8.1 Hz, 1H), 7.90 (dd, J = 8.3, 8.5 Hz, 1H), 7.77 (t, J = 1.9 Hz, 1H), 7.74 – 7.71 (m, 1H), 7.70 (d, J = 9.3 Hz, 1H), 7.51 (d, J = 8.9 Hz, 1H), 7.39 (d, J = 8.6 Hz, 1H), 7.00 (d, J = 8.1 Hz, 1H), 6.92 (d, J = 7.7 Hz, 1H), 4.71-4.78 (m, 2H), 4.54-4.62 (m, 1H), 4.30-4.37 (m, 1H), 3.80 (s, 3H), 3.76 (s, 3H), 3.23 (dt, 13.8 Hz, 7.6 Hz, 1H), 2.15-2.31 (m, 4H), 1.90-1.99 (m, 2H), 1.35-1.64 (m, 20H), 1.27 (t, J = 7.4 Hz, 3H), 0.44 (t, J = 7.3 Hz, 3H). <sup>13</sup>C NMR (151 MHz, CD<sub>2</sub>Cl<sub>2</sub>) δ 160.3, 159.5, 143.7, 143.4, 142.4, 139.4, 139.3, 138.0, 136.4, 135.8, 124.7, 123.5, 123.5, 121.6, 117.4, 116.3, 114.9, 110.6, 108.0, 107.9, 105.0, 104.9, 61.0, 53.2, 56.5, 56.4, 54.0, 30.8, 30.7, 24.1, 23.9, 23.9, 23.9, 23.9, 23.8, 23.8, 22.5, 22.0, 21.8, 21.0, 11.4, 10.5. <sup>19</sup>F NMR (376 MHz, CD<sub>2</sub>Cl<sub>2</sub>) δ -72.4 (d, J = 712 Hz). <sup>31</sup>P NMR (162 MHz, CD<sub>2</sub>Cl<sub>2</sub>) δ -144.4 (sept, J = 712 Hz). HRMS (ESI) calcd. for C<sub>42</sub>H<sub>54</sub>N<sub>4</sub>O<sub>2</sub><sup>++</sup> (M-2PF<sub>6</sub>): m/z 323.2118, found: 323.2122 (1 ppm). Following the same procedure, the two enantiomers of **1b**(BF<sub>4</sub>) were employed to afford (*M*)-**2.H(PF<sub>6</sub>)<sub>2</sub>** in 74% yield and (*P*)-**2.H(PF<sub>6</sub>)<sub>2</sub>** in 67% yield.

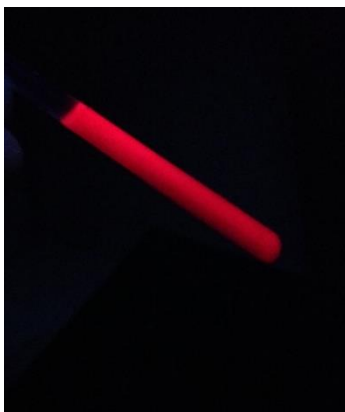

Figure S1. Picture of *rac*-**2.H(PF<sub>6</sub>)<sub>2</sub>** at 77 K in MeTHF irradiated at 254nm.



### Complex 5(PF<sub>6</sub>):

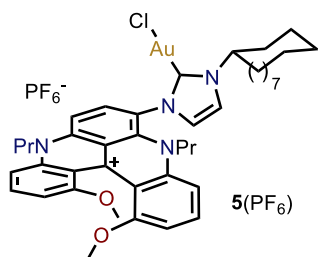

In the glovebox, **2.H**(PF<sub>6</sub>)<sub>2</sub> (100 mg, 0.1 mmol, 1 equiv.) and tBuOK (24 mg, 0.2 mmol, 2 equiv.) were dissolved in THF (5 mL). The resulting mixture was stirred at room temperature for 10 minutes. Then, AuCl.SMe<sub>2</sub> (32 mg, 0.1 mmol, 1 equiv.) was added and the resulting mixture was stirred at room temperature for 3 hours. Outside the glovebox, the solvent was removed and the mixture was dissolved in dichloromethane (50 mL). Water (5 mL) and KPF<sub>6</sub> (58 mg, 0.3 mmol, 3 equiv.) was added. The resulting mixture was stirred at room temperature for 1 hour. The organic layer was separated, dried with MgSO<sub>4</sub> and evaporated under reduced pressure. Then, the dark green solid was purified by flash chromatography on silica gel (eluent: Dichloromethane/Acetone: 98/2) to afford the gold complex **5**(PF<sub>6</sub>) as a dark green solid (55 mg, 51%). Mixture of 2 atropoisomers with <sup>a</sup>major/<sup>b</sup>minor = 0.6/0.4: <sup>1</sup>H NMR (400 MHz, CD<sub>2</sub>Cl<sub>2</sub>) δ 8.42<sup>a</sup> (d, *J* = 9.2 Hz, 0.6H), 7.99-8.07<sup>a,b</sup> (m, 1.4H), 7.84-7.91<sup>a,b</sup> (m, 1H), 7.62-7.67<sup>a,b</sup> (m, 1.4H), 7.41-7.51<sup>a,b</sup> (m, 2H), 7.32<sup>a</sup> (d, *J* = 8.7 Hz, 0.6H), 7.24<sup>b</sup> (d, *J* = 8.7 Hz, 0.4H), 7.20<sup>a</sup> (m, 0.6H) 6.95-6.99<sup>a,b</sup> (m, 1H), 6.89<sup>a,b</sup> (d, *J* = 8.2 Hz, 1H), 5.12-5.19<sup>a</sup> (m, 0.6H), 4.99-5.05<sup>f</sup> (m, 0.4H), 4.68-4.78<sup>a,b</sup> (m, 1H), 4.49-4.60<sup>a,b</sup> (m, 1H), 4.15-4.29<sup>a,b</sup> (m, 1H), 3.73-3.82<sup>a,b</sup> (m, 6H), 3.42<sup>a</sup> (dt, *J* = 14.3, 7.3Hz, 0.6H), 3.18<sup>b</sup> (dt, *J* = 14.5, 7.5Hz, 0.4H), 2.06-2.38<sup>f</sup> (m, 4H), 1.90-1.25<sup>a,b</sup> (m, 25H), 0.44-0.52<sup>a,b</sup> (m, 3H). <sup>13</sup>C NMR (101 MHz, CD<sub>2</sub>Cl<sub>2</sub>) δ 173.2, 172.3, 160.2, 159.5, 144.4, 144.0, 143.4, 143.3, 142.3, 139.0, 138.7, 138.6, 137.9, 137.7, 137.6, 136.7, 136.3, 136.2, 123.9, 123.4, 122.1, 121.4, 121.0, 120.6, 120.4, 117.1, 116.9, 114.7, 110.1, 110.0, 108.0, 107.9, 107.3, 107.3, 104.7, 104.6, 104.5, 104.4, 59.2, 56.5, 56.5, 56.3, 56.3, 53.1, 32.2, 32.0, 31.7, 31.6, 24.8, 24.7, 24.6, 24.3, 24.2, 24.0, 23.9, 23.8, 23.6, 23.5, 23.1, 22.6, 22.4, 22.4, 22.2, 22.2, 21.0, 11.4, 11.2, 11.0. <sup>19</sup>F NMR (376 MHz, CD<sub>2</sub>Cl<sub>2</sub>) δ -73.3 (d, *J* = 711 Hz). <sup>31</sup>P NMR (162 MHz, CD<sub>2</sub>Cl<sub>2</sub>) δ -144.5 (sept, *J* = 711 Hz). HRMS (ESI) calcd. for C<sub>42</sub>H<sub>53</sub>N<sub>4</sub>O<sub>2</sub>ClAu<sup>+</sup> (M-PF<sub>6</sub>): *m/z* 877.3517, found: 877.3520 (0 ppm).

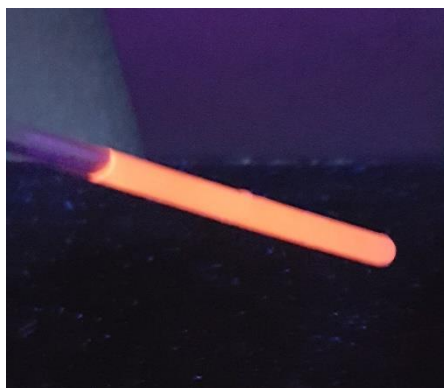

Figure S2. Picture of **5**(PF<sub>6</sub>) at 77 K in MeTHF irradiated at 254nm.

### Complex 6(PF<sub>6</sub>)<sub>2</sub>:

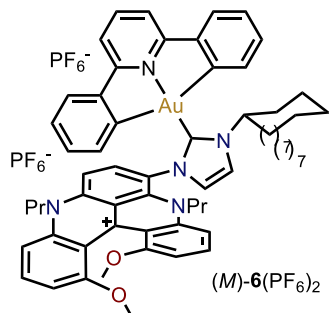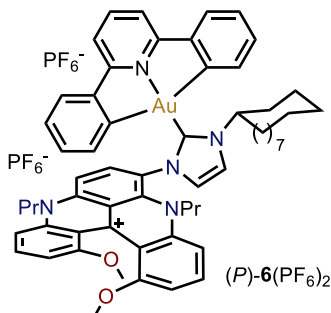

In the glovebox, **2.H**(PF<sub>6</sub>)<sub>2</sub> (20 mg, 0.02 mmol, 1 equiv.) and tBuOK (5.0 mg, 0.04 mmol, 2 equiv.) were dissolved in MeOH (4 mL). The resulting mixture was stirred at room temperature for 10 minutes. Then, Au(C<sup>^</sup>N<sup>^</sup>C)Cl (10 mg, 0.02 mmol, 1 equiv.) was added and the resulting mixture was stirred at room temperature for 3 hours. Outside the glovebox, the solvent was removed and the mixture was dissolved in dichloromethane (10 mL). Water (2 mL) and KPF<sub>6</sub> (11 mg) was added. The resulting mixture was stirred at room temperature for 1 hour. The organic layer was separated, dried over MgSO<sub>4</sub> and evaporated under reduced pressure. The crude product was successively washed with Et<sub>2</sub>O (3x10 mL), then pentane (10 mL). The dark solid was purified by flash chromatography on silica gel (eluent: Dichloromethane/Acetone: 9/1) to afford the gold complex **6**(PF<sub>6</sub>)<sub>2</sub> as a dark green solid (22 mg, 81%, dr > 20:1). <sup>1</sup>H NMR (400 MHz, CD<sub>2</sub>Cl<sub>2</sub>) δ 8.28-8.31 (m, 2H), 7.88-7.98 (m, 3H), 7.72-7.75 (m, 1H), 7.55-7.63 (m, 3H), 7.51 (d, *J* = 8.1 Hz, 1H), 7.38 (d, *J* = 9.0 Hz, 1H), 7.34 (d, *J* = 6.9 Hz, 1H), 6.95-7.22 (m, 5H), 6.87 (d, *J* = 8.1 Hz, 1H), 6.54 (d, *J* = 8.1 Hz, 1H), 6.39 (d, *J* = 7.2 Hz, 1H), 5.88 (d, *J* = 8.7 Hz, 1H), 4.73-4.78 (m, 1H), 4.53-4.61 (m, 1H), 4.16-4.35 (m, 2H), 3.57-3.83 (m, 1H), 3.64 (s, 3H), 3.57 (s, 3H), 2.31-2.43 (m, 1H), 1.96-2.20 (m, 4H), 1.70-1.82 (m, 1H), 0.83-1.61 (m, 23H), 0.36 (t, *J*

= 7.3 Hz, 3H). **<sup>13</sup>C NMR (101 MHz, CD<sub>2</sub>Cl<sub>2</sub>) δ** 164.4, 164.3, 164.2, 162.3, 159.9, 159.5, 155.9, 150.7, 148.2, 144.6, 142.8, 142.1, 142.0, 139.1, 138.3, 138.1, 137.5, 136.7, 136.4, 135.7, 133.5, 132.1, 129.7, 128.1, 127.6, 126.2, 125.0, 123.3, 120.9, 120.6, 118.7, 118.1, 115.0, 114.3, 108.5, 108.4, 108.0, 104.7, 104.0, 60.6, 56.4, 56.3, 55.2, 31.6, 31.4, 30.2, 24.9, 24.8, 24.2, 23.6, 23.3, 22.7, 22.6, 22.5, 22.2, 21.5, 21.0, 11.3, 11.0. **<sup>19</sup>F NMR (376 MHz, CD<sub>2</sub>Cl<sub>2</sub>) δ** -72.9 (d, *J* = 711 Hz). **<sup>31</sup>P NMR (162 MHz, CD<sub>2</sub>Cl<sub>2</sub>) δ** -144.3 (sept, *J* = 711 Hz). **HRMS (ESI)** calcd. for C<sub>59</sub>H<sub>64</sub>N<sub>5</sub>O<sub>2</sub>Au<sup>++</sup> (M-2PF<sub>6</sub>): *m/z* 535.7357, found: 535.7364 (1 ppm).

The reaction was performed with the separated enantiomers of 2.H(PF<sub>6</sub>)<sub>2</sub>. (*M*)-2.H(PF<sub>6</sub>)<sub>2</sub> afforded (*M*)-6(PF<sub>6</sub>)<sub>2</sub> in 64% yield, (*P*)-2.H(PF<sub>6</sub>)<sub>2</sub> afforded (*P*)-6(PF<sub>6</sub>)<sub>2</sub> in 69% yield.

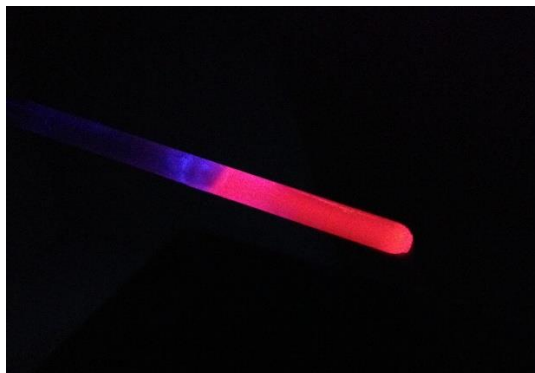

Figure S3. Picture of *rac*-6(PF<sub>6</sub>)<sub>2</sub> at 77 K in MeTHF irradiated at 254nm.

#### Compound A-Se:

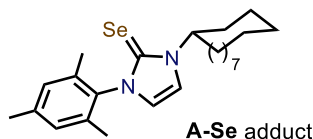

**A-Se adduct**

In a round-bottomed flask, **A.H(BF<sub>4</sub>)** (100 mg, 0.23 mmol, 1 equiv.), tBuOK (51 mg, 0.45 mmol, 2 equiv.) and metallic Se (27 mg, 0.34 mmol, 1.5 equiv.) were dissolved in THF (2 mL). The resulting solution was stirred at room temperature overnight and the solvent was removed under vacuum. Dichloromethane was added and after filtration over Celite and evaporation, the residue was washed with *n*-pentane and dried to afford the selenium adduct **A-Se** as a white powder (76 mg, 78%). **<sup>1</sup>H NMR (400 MHz, CDCl<sub>3</sub>) δ** 7.01 (d, *J* = 2.3 Hz, 1H), 6.97 (s, 2H), 6.78 (d, *J* = 2.3 Hz, 1H), 5.29-5.23 (m, 1H), 2.32 (s, 3H), 1.97–2.05 (m, 2H), 2.01 (s, 6H), 1.55 – 1.78 (m, 4H), 1.49 – 1.29 (m, 16H). **<sup>13</sup>C NMR (101 MHz, CDCl<sub>3</sub>) δ** 156.8, 139.2, 135.7, 134.5, 129.3, 119.4, 116.8, 56.0, 30.1, 23.8, 23.7, 23.6, 21.8, 21.3, 18.2. **<sup>77</sup>Se NMR (115 MHz, CDCl<sub>3</sub>) δ** 10.2 (s). **HRMS (ESI)** calcd. for C<sub>24</sub>H<sub>37</sub>N<sub>2</sub>Se (M+H): *m/z* 432.2122, found: 432.2129 (0 ppm).

## Optical and chiroptical properties

### Absorption, fluorescence, ECD and CPL spectra

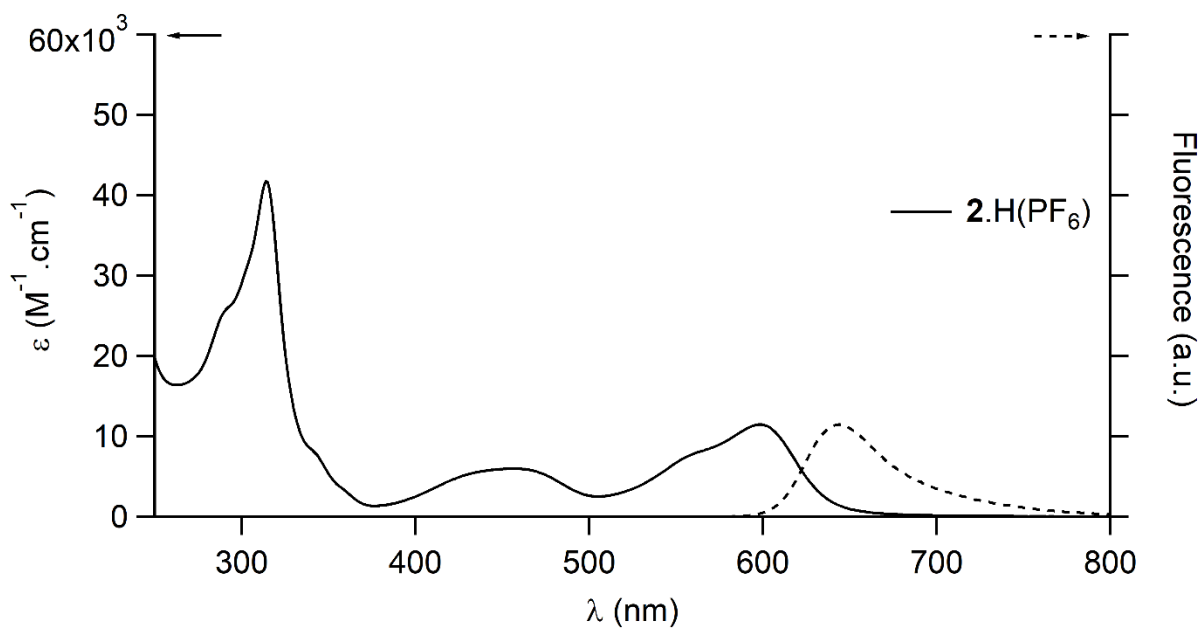

Figure S4. Absorption (plain line) and fluorescence (dashed line) spectra of  $2.H(PF_6)_2$  in acetonitrile solution ( $C = 0.82 \cdot 10^{-5}$  M).

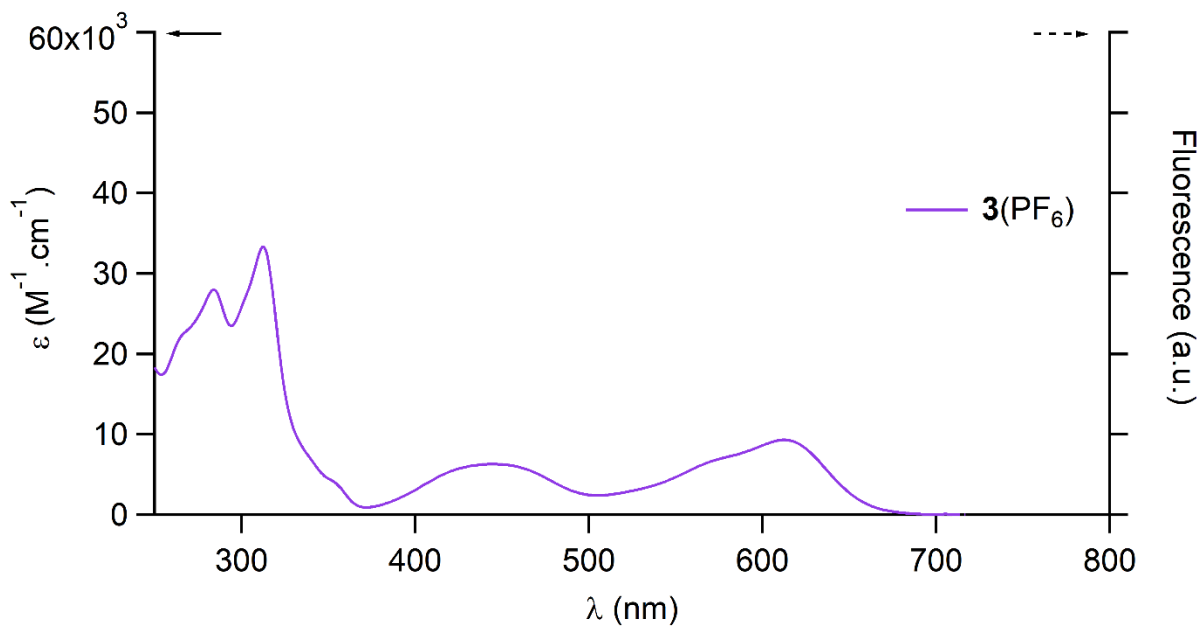

Figure S5. Absorption (plain line) spectrum of  $3(PF_6)$  in acetonitrile solution ( $C = 1.07 \cdot 10^{-5}$  M).



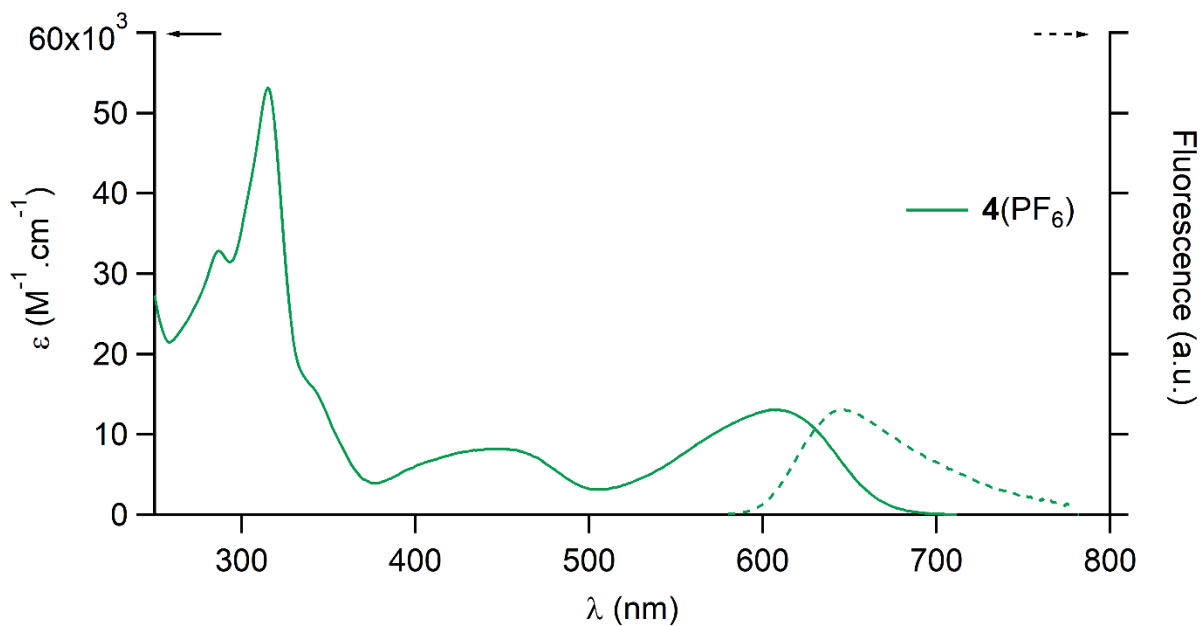

Figure S6. Absorption (plain line) and fluorescence (dashed line) spectra of **4(PF<sub>6</sub>)** in acetonitrile solution ( $C = 0.98 \cdot 10^{-5}$  M).

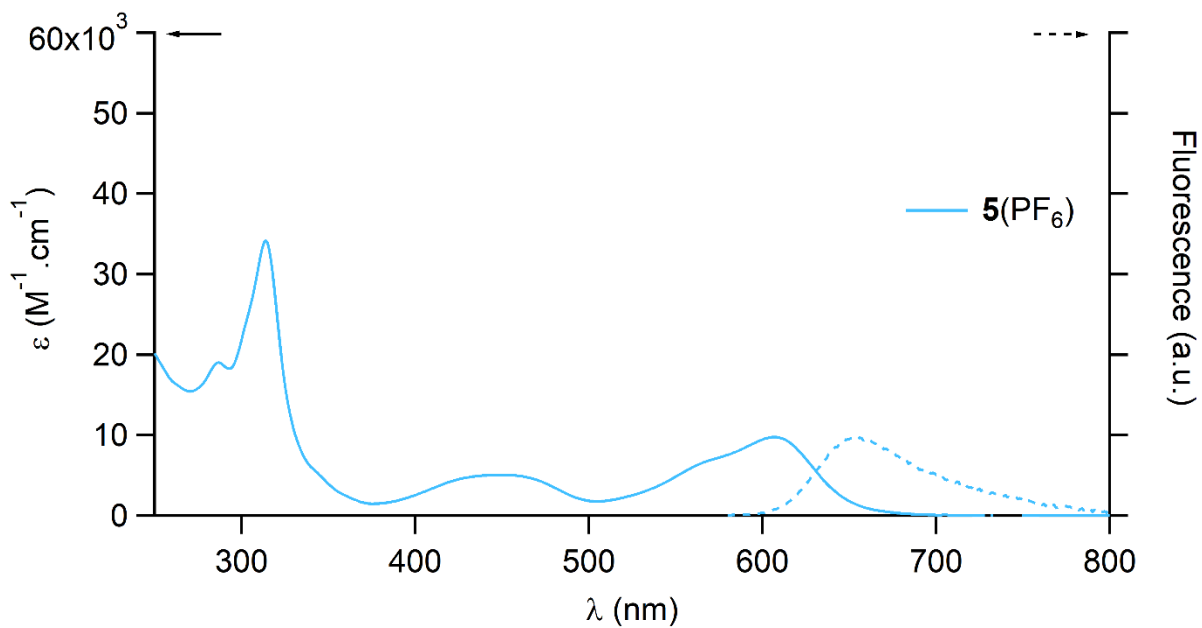

Figure S7. Absorption (plain line) and fluorescence (dashed line) spectra of **5(PF<sub>6</sub>)** in acetonitrile solution ( $C = 1.21 \cdot 10^{-5}$  M).

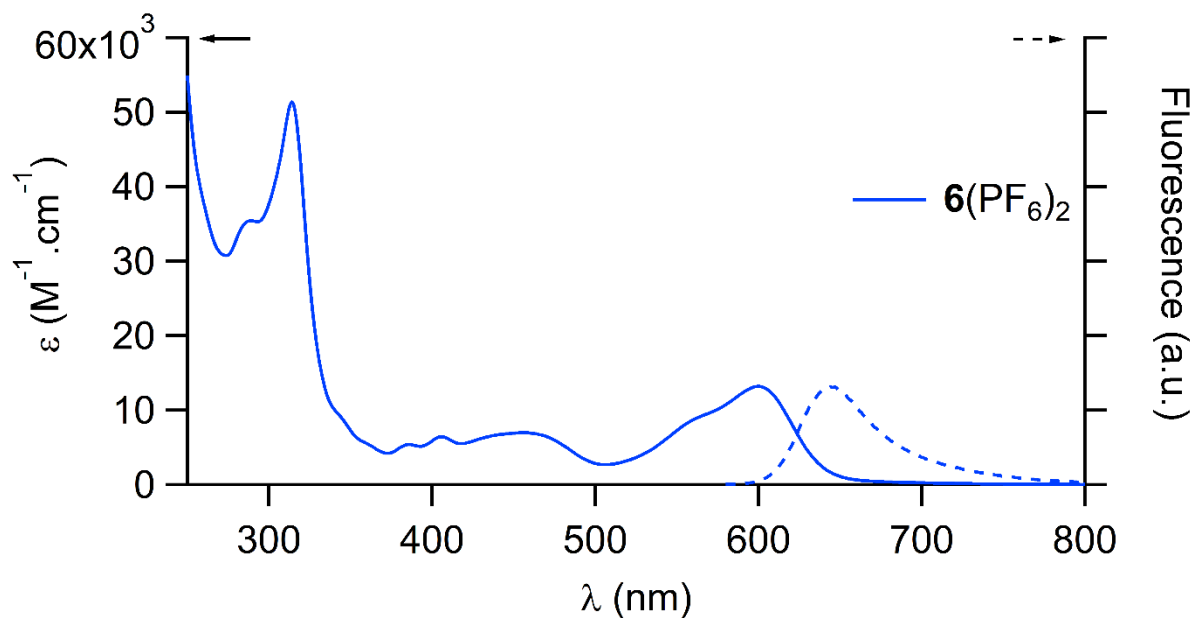

Figure S8. Absorption (plain line) and fluorescence (dashed line) spectra of  $6(\text{PF}_6)_2$  in acetonitrile solution ( $C = 1.04 \cdot 10^{-5} \text{ M}$ ).

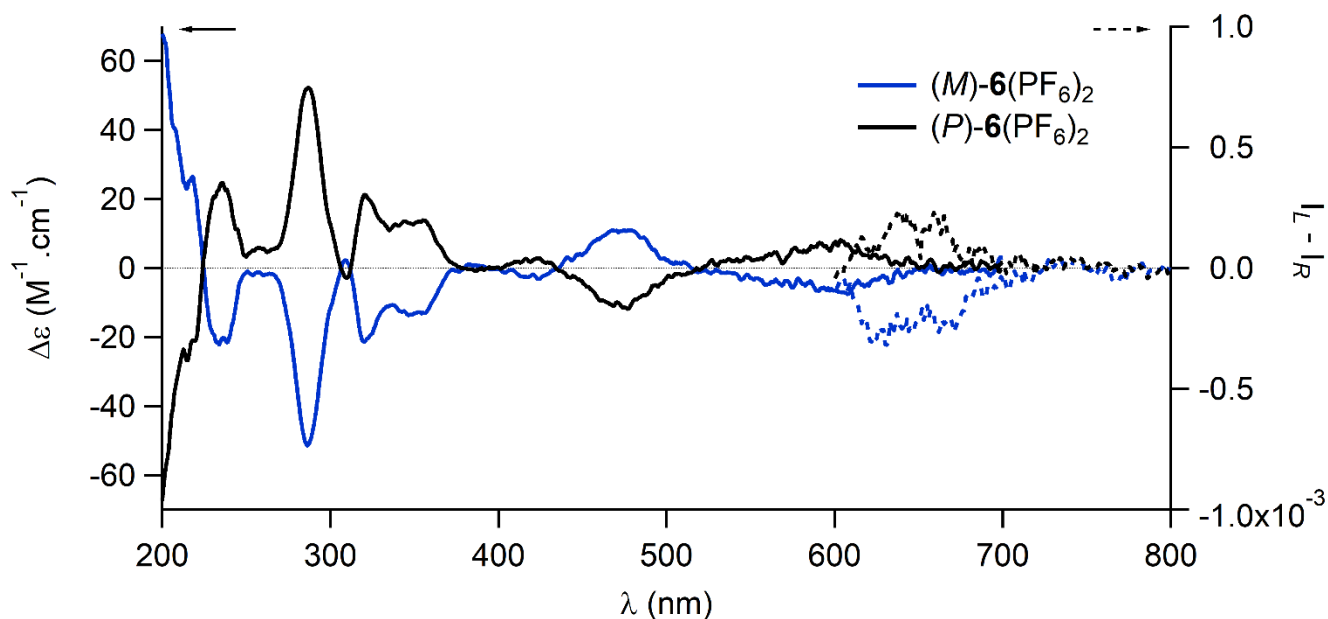

Figure S9. ECD (plain line) and CPL (dashed line) spectra in acetonitrile solutions of  $(M)\text{-}6(\text{PF}_6)_2$  (blue lines,  $[\alpha]_{365}^{20} -4000$ ,  $C = 0.99 \cdot 10^{-5} \text{ M}$ ) and  $(P)\text{-}6(\text{PF}_6)_2$  (black lines,  $[\alpha]_{365}^{20} +4000$ ,  $C = 0.98 \cdot 10^{-5} \text{ M}$ ).

## Computational details

### General considerations

All geometries were fully optimized in gas phase at the B3PLYP level<sup>7</sup> of theory without any constraints at 298 K and 1 atm. The Bery algorithm was used for geometry optimizations.<sup>8</sup> 6-311G(d,p) Pople basis set was used for all atoms.<sup>9</sup> Frequency calculations were performed at the same level for all intermediates and transition states to confirm minima (no imaginary frequencies) and first order saddle points (one imaginary frequency representing the desired reaction coordinate), respectively. Furthermore, transition states were further confirmed by either intrinsic reaction coordinates (IRC).<sup>10</sup> DFT and TD-DFT calculations were performed using the Gaussian 09, Revision D.01 program.<sup>11</sup>

### Nomenclature

In the geometrical analyses (see below), the atropisomeric situation around the  $C(sp^2)$ – $N(sp^2)$  bond linking the helicene and the imidazole moieties will be described using standard IUPAC descriptors.

The orientation of the propyl side chain adopting a *gauche* conformation will also be described using the IUPAC descriptors for atropisomers.<sup>12</sup> The particular case of  $N(sp^2)$ – $C(sp^3)$  bonds is reminded here. The Newman projection of this bond from the  $N(sp^2)$  to the  $C(sp^3)$  allows to determine the dihedral angle  $\theta$  between the substituents. Four main types of dihedral angles can be defined. For  $0^\circ < \theta < \pm 30^\circ$ , the substituents are designated as synperiplanar (*sp*) and for  $\pm 150^\circ < \theta < 180^\circ$  they are named antiperiplanar (*ap*). For  $30^\circ < \theta < 90^\circ$  (+*sc*) or  $-30^\circ < \theta < -90^\circ$  (–*sc*) the synclinal (*sc*) terminology is used and for  $90^\circ < \theta < 150^\circ$  (+*ac*) or  $-90^\circ < \theta < -150^\circ$  (–*ac*) the anticlinal (*ac*) terminology is used (Figure S10).

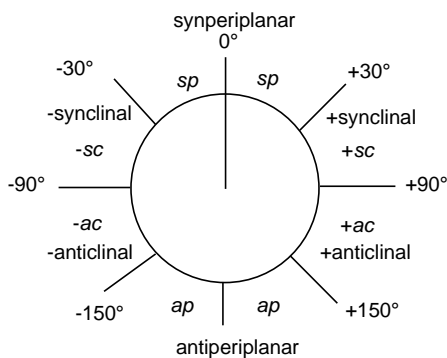

Figure S10. General IUPAC nomenclature of atropisomers.

The CIP priority rules are used to characterize the substituents. In the particular case of two identical groups, here A, linked to the  $C(sp^3)$  atom, the third group C is taken as reference irrespective of the CIP priority rules (Figure S11, with  $X > Y$ ).

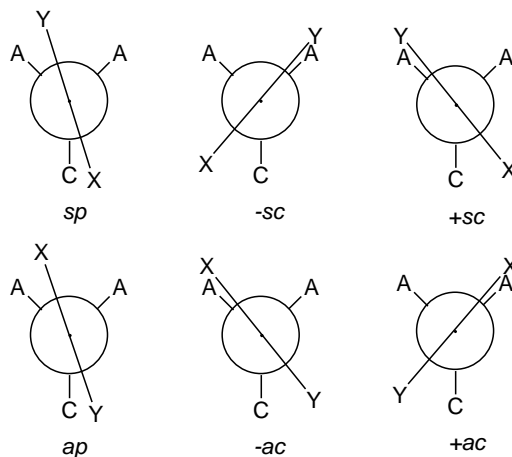

Figure S11. Nomenclature rules for atropisomerism around  $C(sp^3)$ – $N(sp^2)$  bonds when two identical substituents are linked to the  $C(sp^3)$  atom.

For the Helicene-NHC hybrids, the X and Y priority of the substituents linked to the N( $sp^2$ ) atom is attributed according to the CIP priority rules. For the propyl chain, the two H atoms linked to the C( $sp^3$ ) are designed as A and the adjacent CH<sub>2</sub> groups take the priority (C). According to solid-state structures and computational analyses, the propyl chain can adopt either a  $-sc$  or  $-ac$  conformation (negative value of the torsion angle) or a  $+sc$  or  $+ac$  conformation (positive value of the torsion angle) depending on the face of the helicene it is pointing toward. The orientation of the propyl chain will thus be designed as (–) or (+) (see Figure S12).

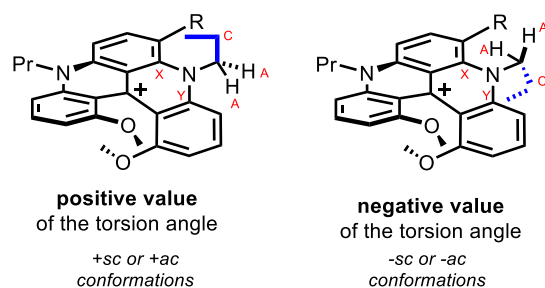

Figure S12. Orientation of the propyl chain: (+) and (–) torsion angles.

## Results

### Geometrical analysis of analogues of selenium adduct **3**(PF<sub>6</sub>)

The crystal structure of **3**(PF<sub>6</sub>) was used as starting point. With the aim to limit unwanted irrelevant conformational local minima, the structure was simplified: the propyl side chain away from the imidazolidinene has been truncated to a methyl residue, and the cyclododecyl moiety has been exchanged for a conformationally rigid cyclohexyl residue. Those modifications appear in grey color in Figure S13. The (*P*)-helicity has been arbitrary assign to all stereoisomers. The conformation of the biaryl can be either *aS* or *aR* and the torsion angle of the propyl chain can be either (+) or (–). Those modifications are highlighted in blue color in Figure S13. The dihedral angle *a-b-c-d* will be used to describe further the atropoisomery at the helicene-imidazole junction. The four possible stereoisomers are depicted in Figure SX.

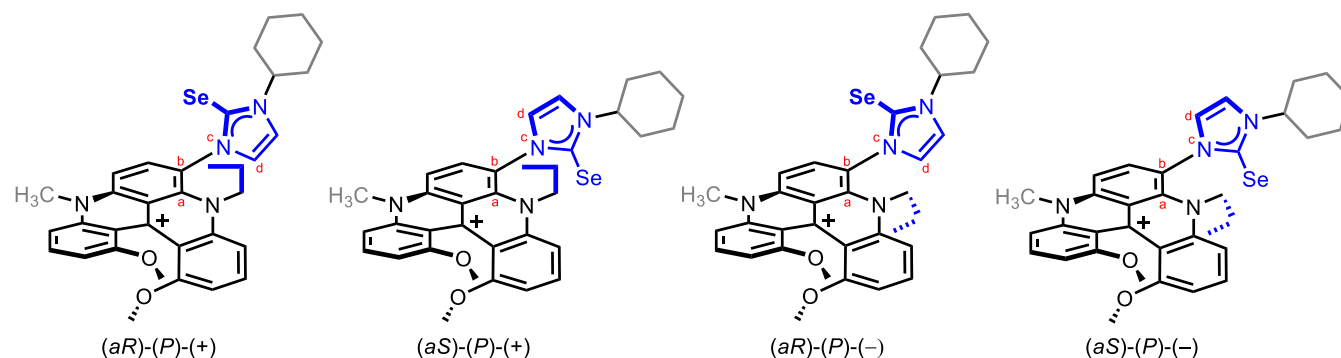

Figure S13. Four possible stereoisomers of simplified selenium adduct **3**. Simplifications are highlighted in grey color, the varying stereo elements are indicated in blue color, the *a-b-c-d* dihedral angle describes the atropoisomers.

The optimized geometries of the four possible stereoisomers are depicted in Figure S14 along with their  $\Delta G(298\text{ K})$  energies relative to that of the most stable isomer arbitrary set at  $0.0\text{ kcal mol}^{-1}$ . The *aS*-*P*(+) stereoisomer was found to be the most stable of the series. This is somewhat surprising as the *aR*-*P*(+) stereoisomer was found in the crystal packing of **3**(PF<sub>6</sub>). Computationally, this stereoisomer was found to be less stable by only  $0.2\text{ kcal mol}^{-1}$ . This would correspond to a 0.58:0.42 ratio at 298 K, which is close to the experimental ratio of 0.6:0.4 determined experimentally for **3**(PF<sub>6</sub>) by <sup>77</sup>Se NMR spectroscopy (See Figure SX). Interestingly for the *aR*-*P*(+), the computed structure is very similar to that observed in the crystal structure of **3**(PF<sub>6</sub>), indicating that the simplifications used for the calculation (appearing in grey color in Figure SX) do not alter the global geometry of the helicene-imidazol moiety. The *a-b-c-d* dihedral angle values is of  $+65.5^\circ$  while it reaches  $+63.6^\circ$  in the X-ray structure of **3**(PF<sub>6</sub>). The interaction between the propyl side chain and the Se atom prevent the biaryl to adopt a preferential  $90^\circ$  conformation.

The two structures exhibiting a (-) orientation of the propyl side chain were found to be less stable. In the case of aR-P(-), the structure is clearly destabilized and was located at +14.1 kcal mol<sup>-1</sup>. In this case, the dihedral angle between the helicene and the imidazole units is +100.8°. Concerning its epimer aS-P(-), the propyl chain does not adopt a gauche conformation but a distorted antiperiplanar instead. This stabilises somehow this isomer that lies at +1.0 kcal mol<sup>-1</sup> (a-b-c-d = -118.1°). However, this conformation of the propyl side chain is not observed experimentally by <sup>1</sup>H NMR spectroscopy.

Finally, the isomerization from aS-P(+) to aR-S(+) was also computed. In the transition state, the aniline and imidazole moieties are almost coplanar, with a dihedral angle of -6.3°. This TS was located at +17.2 kcal mol<sup>-1</sup>. Considering a first order kinetic, this values would correspond to a kinetic constant of 1.50 s<sup>-1</sup> and a half-life T<sub>1/2</sub> of 0.46 s. This is consistent with a facile isomerization and yet the possibility to distinguish the two species by NMR spectroscopy.

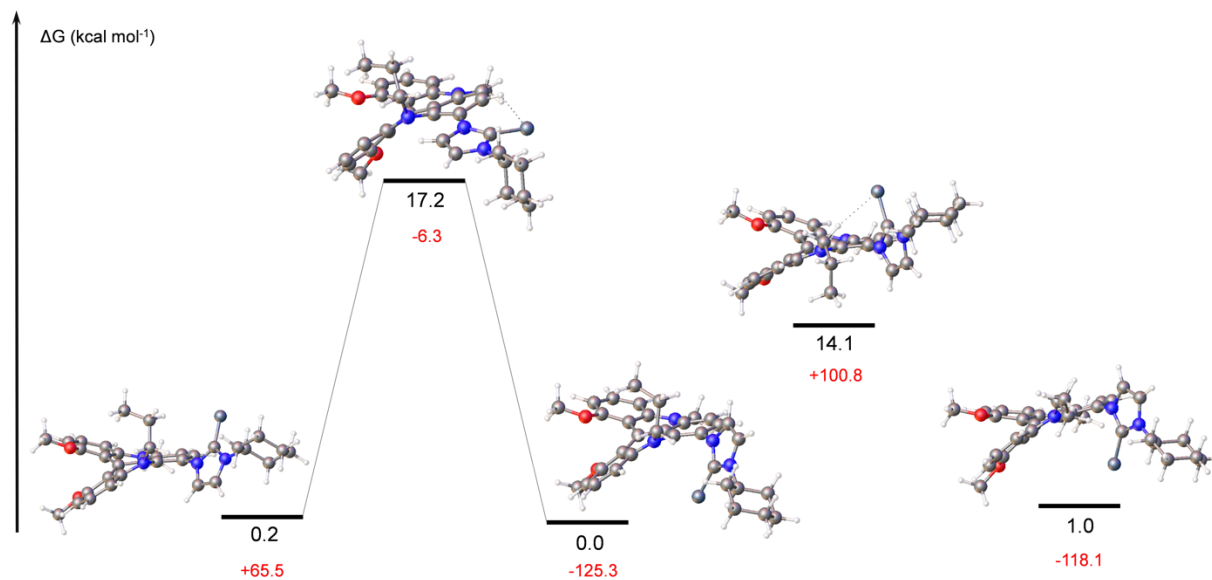

Figure S14. Computed optimized geometries of the four possible stereoisomers of simplified selenium adduct **3**. The Gibb's free energy (298 K) are given in kcal mol<sup>-1</sup>. The values of the dihedral angle a-b-c-d are also given. The reaction coordinates of the isomerization aR-P(+) → aS-P(+) were also computed and the structure of the TS is depicted.

#### Geometrical analysis of analogues of rhodium (I) complex **4**(PF<sub>6</sub>)

The optimized geometries of the two possible stereoisomers with the appropriate *gauche* conformation of the propyl side chain are depicted in Figure S15 along with their ΔG(298 K) energies relative to that of the most stable stereoisomer arbitrary set at 0.0 kcal mol<sup>-1</sup>. Similarly to the case of the Se adduct, the (aS)-(P) stereoisomer was found to be the most stable by 1.6 kcal mol<sup>-1</sup>.

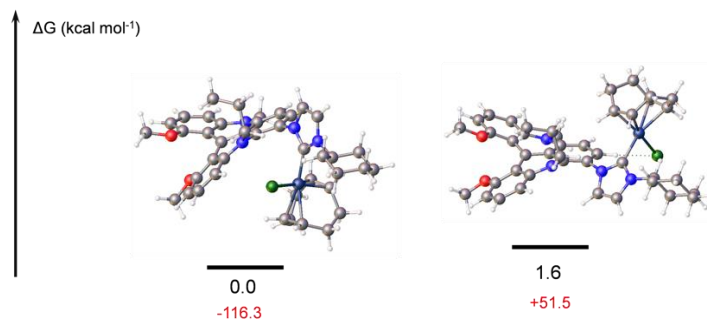

Figure S15. Computed optimized geometries of two possible stereoisomers with the appropriate *gauche* conformation of the propyl side chain of simplified rhodium (I) complex **4**. The Gibb's free energy (298 K) are given in kcal mol<sup>-1</sup>. The values of the dihedral angle a-b-c-d are also given.

### Geometrical analysis of analogues of gold (I) complex 5(PF<sub>6</sub>)

The optimized geometries of the two possible stereoisomers with the appropriate *gauche* conformation of the propyl side chain are depicted in Figure S16 along with their  $\Delta G(298\text{ K})$  energies relative to that of the most stable stereoisomer arbitrary set at 0.0 kcal mol<sup>-1</sup>. Similarly to the case of the Se adduct, the (*aS*)-(*P*) stereoisomer was found to be the most stable by 1.1 kcal mol<sup>-1</sup>.

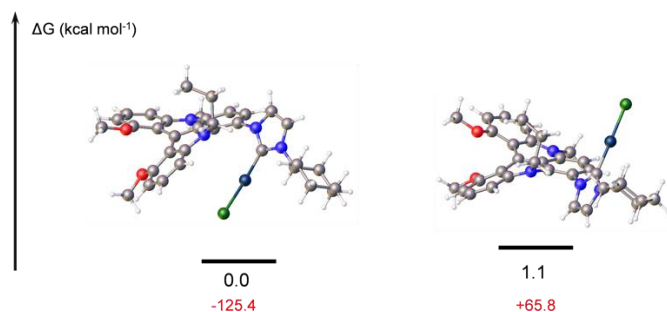

Figure S16. Computed optimized geometries of two possible stereoisomers with the appropriate *gauche* conformation of the propyl side chain of simplified gold (I) complex 5. The Gibb's free energy (298 K) are given in kcal mol<sup>-1</sup>. The values of the dihedral angle **a-b-c-d** are also given.

### Geometrical analysis of analogues of gold(III) complex 6(PF<sub>6</sub>)<sub>2</sub>

The optimized geometries of the two possible stereoisomers with the appropriate *gauche* conformation of the propyl side chain are depicted in Figure S17 along with their  $\Delta G(298\text{ K})$  energies relative to that of the most stable stereoisomer arbitrary set at 0.0 kcal mol<sup>-1</sup>. The (*aS*)-(*P*) stereoisomer was found to be more stable by only 0.1 kcal mol<sup>-1</sup>. As such, the two stereoisomer should be obtained in a 54:46 ratio. As a reminder, only one stereoisomer could be observed by NMR spectroscopy. This could be rationalized by either (i) isochronous spectra of the two stereoisomers in NMR spectroscopy or (ii) a facile isomerization, faster than the NMR time scale. The (*aS*)-(*P*)  $\rightarrow$  (*aR*)-(*P*) isomerization process was also investigated computationally. In the transition state, the dihedral angle of the aniline and imidazole moieties reaches  $-26.0^\circ$ , consequence of the high steric hindrance of the bulky cyclometalated Au (III) moiety. This TS was located at +13.5 kcal mol<sup>-1</sup>. Considering a first order kinetic, this values corresponds to a kinetic constant of 777 s<sup>-1</sup> and a half-life  $T_{1/2}$  of  $9 \cdot 10^{-4}$  s. Clearly, the isomerization is faster than the NMR time scale and the two stereoisomers are not distinguishable with this technics.

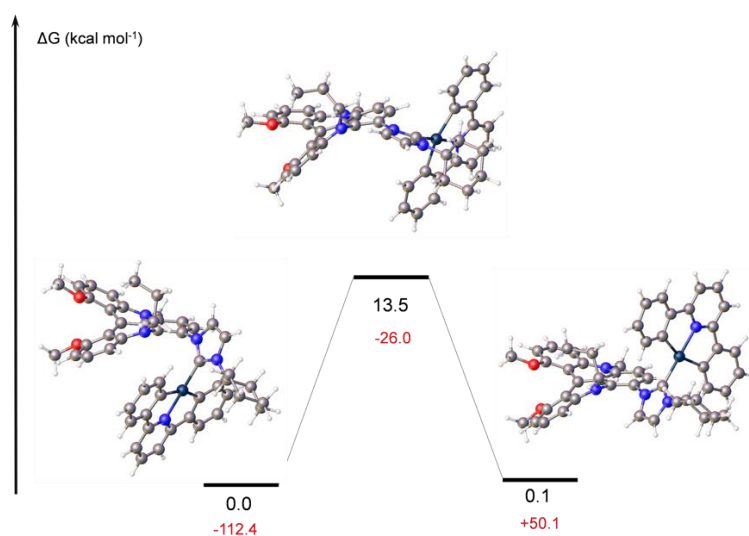

Figure S17. Computed optimized geometries of two possible stereoisomers with the appropriate *gauche* conformation of the propyl side chain of simplified gold (III) complex 5. The Gibb's free energy (298 K) are given in kcal mol<sup>-1</sup>. The values of the dihedral angle **a-b-c-d** are also given. The reaction coordinates of the isomerization *aR*-*P*-(+)  $\rightarrow$  *aS*-*P*-(+) were also computed and the structure of the TS is depicted.

The diastereomeric ratios determined experimentally through  $^1\text{H}$  (and  $^{77}\text{Se}$ ) NMR spectroscopy are summarized in Table S1 and compared with the computed ratios gained on simplified analogues.

| Compound | Exp ratio (NMR)    | Computed ratio | Computed $\Delta E$ (kcal $\text{mol}^{-1}$ ) |
|----------|--------------------|----------------|-----------------------------------------------|
| <b>3</b> | 0.6:0.4 at 298 K   | 0.58:0.52      | 0.2                                           |
| <b>4</b> | 0.6:0.4 at 298 K   | 0.93:0.07      | 1.6                                           |
| <b>5</b> | 0.6:0.4 at 298 K   | 0.86:0.14      | 1.1                                           |
| <b>6</b> | 0.52:0.48 at 233 K | 0.54:0.46      | 0.1                                           |

Table S1. Comparison of experimental and computed diastereomeric ratios.

### Steric and electronic parameters of $2(\text{PF}_6)$ .

#### Topographical steric maps of $3(\text{PF}_6)$ and $4(\text{PF}_6)$

The topographical steric maps of  $3(\text{PF}_6)$  (left) and  $4(\text{PF}_6)$  (right) were established using the SamBVca web application.<sup>13</sup> Values given in the four corners of the maps are the %Vbur of the ligands in the corresponding quadrant:

The structural parameters of the selenium adduct (*R*)-*P*- $3(\text{PF}_6)$  evidenced the steric hindrance notably caused by the *ortho* N-propyl group of the [4]helicene fragment in the southwest quadrant. Regarding (NHC)RhCl(COD) (*R*)-*P*- $4(\text{PF}_6)$ , a degree of rotational freedom around the N-helicene bond keeps the *ortho* N-propyl group (southwest quadrant) away from the metal center and allows for an efficient decrease of the steric congestion in proximity of the rhodium coordination sphere.

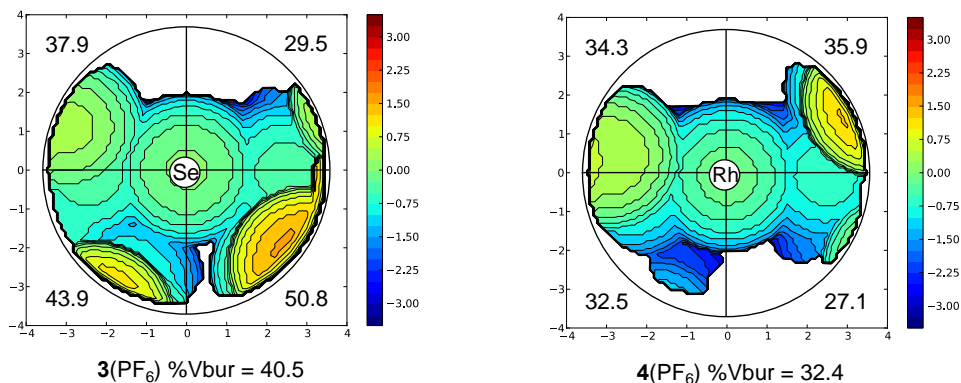

Figure S18. Steric maps of selenium adduct  $3(\text{PF}_6)$  (left) and complex  $4(\text{PF}_6)$  (right).

## Electronic parameters (Tolman Electronic Parameter)

**Procedure:** A solution of **4**(PF<sub>6</sub>) (5 mg) in dichloromethane (3 mL) was placed in a ReactIR schlenk tube. The mixture was degassed by bubbling with N<sub>2</sub>. *In situ* IR spectra were collected every minute during two hours (Figure S19, top). Five minutes after the beginning of the measurement, the solution was saturated with CO by bubbling for 30 minutes. The mixture was next degassed by bubbling with N<sub>2</sub>. After two hours of measurement, two bands at 2088 and 2006 cm<sup>-1</sup> were identified for the CO ligands (resolution 4 cm<sup>-1</sup>, Figure S19, bottom). Next, the residue was precipitated with pentane. <sup>1</sup>H NMR spectroscopy (CD<sub>3</sub>CN) confirmed the disappearance of the cod ligand signals and mass spectroscopy established the formation of the expected complex.

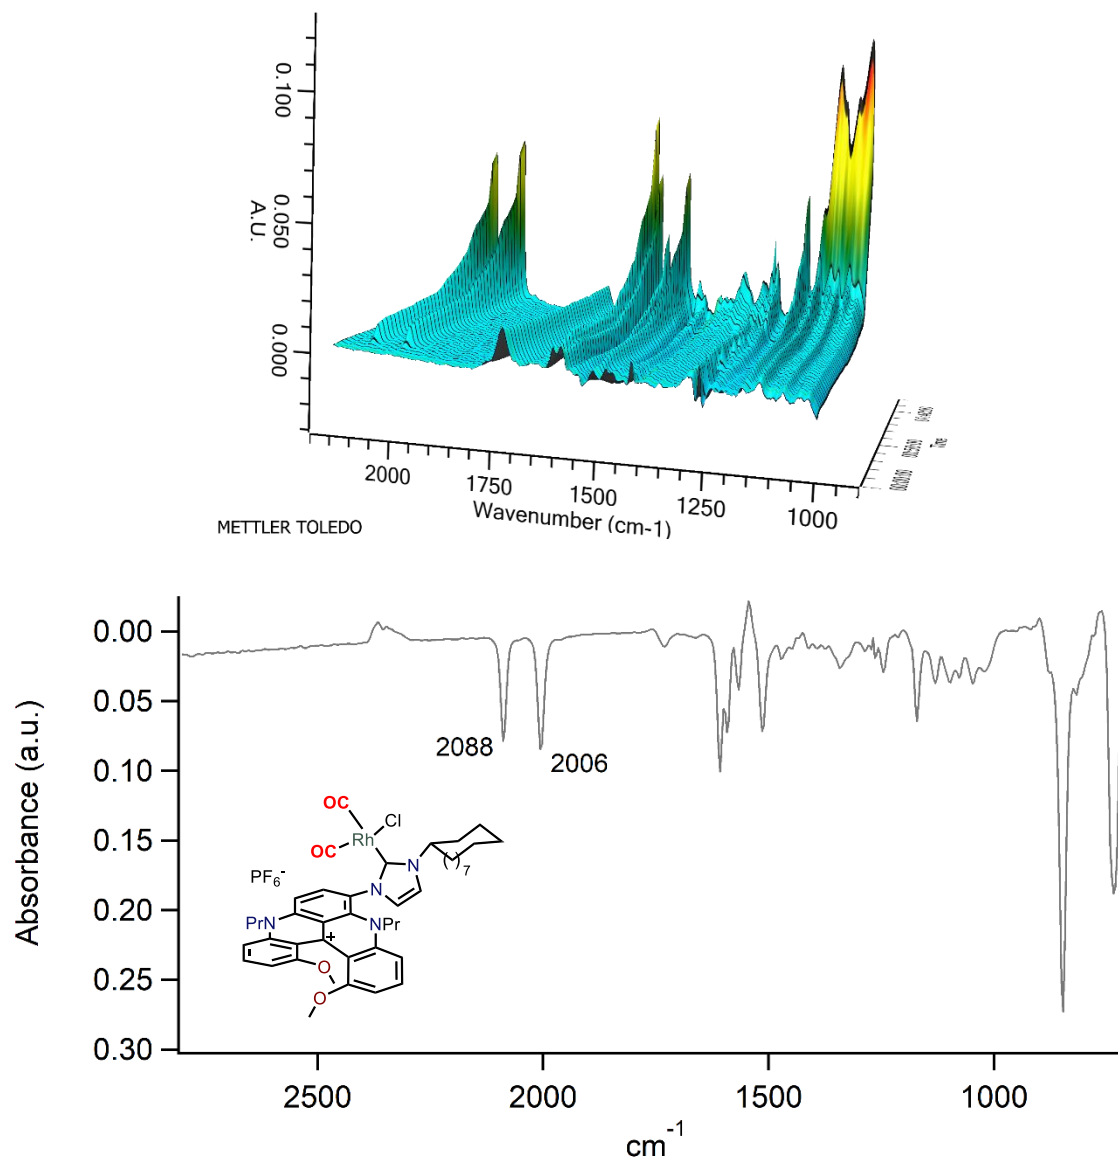

Figure S19. Top: *In situ* IR monitoring. Bottom: *in situ* IR spectrum of [(**2**)Rh(CO)<sub>2</sub>Cl](PF<sub>6</sub>) after 1h50 measurement (CH<sub>2</sub>Cl<sub>2</sub> solution, C ~ 5 10<sup>-3</sup> M).

A TEP of 2055.1 ± 4 cm<sup>-1</sup> was calculated according to equations (1) and (2):<sup>14</sup>

$$\text{TEP} = 0.847\nu_{\text{av}}(\text{CO})[\text{Ir}] + 336 \text{ cm}^{-1} \quad (1)$$

$$\nu_{\text{av}}(\text{CO})[\text{Ir}] = 0.8695\nu_{\text{av}}(\text{CO})[\text{Rh}] + 250.7 \text{ cm}^{-1} \quad (2)$$



## X-ray structure determination

Intensity data were collected at low temperature on an APEXII, Bruker-AXS diffractometer, Mo-K $\alpha$  radiation ( $\lambda = 0.71073 \text{ \AA}$ ). The structure was solved by dual-space algorithm using the SHELXT program,<sup>15</sup> and then refined with full-matrix least-square methods based on F2 (SHELXL-2014).<sup>16</sup> All non-hydrogen atoms were refined with anisotropic atomic displacement parameters. H atoms were finally included in their calculated positions.

### Compound 3(PF<sub>6</sub>) (CCDC 2061398)

Table S2. Crystal data and structure refinement for compound 3(PF<sub>6</sub>).

|                                             |                                                                                                  |
|---------------------------------------------|--------------------------------------------------------------------------------------------------|
| Empirical formula                           | C <sub>44</sub> H <sub>57</sub> Cl <sub>4</sub> F <sub>6</sub> N <sub>4</sub> O <sub>2</sub> PSe |
| Formula weight                              | 1039.66                                                                                          |
| Temperature/K                               | 150 (2)                                                                                          |
| Crystal system                              | triclinic                                                                                        |
| Space group                                 | P-1                                                                                              |
| a/Å                                         | 9.8906(6)                                                                                        |
| b/Å                                         | 12.5154(9)                                                                                       |
| c/Å                                         | 19.2461(13)                                                                                      |
| $\alpha$ /°                                 | 88.465(2)                                                                                        |
| $\beta$ /°                                  | 86.617(2)                                                                                        |
| $\gamma$ /°                                 | 87.886(2)                                                                                        |
| Volume/Å <sup>3</sup>                       | 2375.9(3)                                                                                        |
| Z                                           | 2                                                                                                |
| $\rho_{\text{calc}}/\text{cm}^3$            | 1.453                                                                                            |
| $\mu/\text{mm}^{-1}$                        | 1.113                                                                                            |
| F(000)                                      | 1072                                                                                             |
| Crystal size/mm <sup>3</sup>                | 0.600 × 0.310 × 0.150                                                                            |
| Radiation                                   | Mo-K $\alpha$ ( $\lambda = 0.71073$ )                                                            |
| 2 $\theta$ range for data collection/°      | 1.060 to 27.561                                                                                  |
| Index ranges                                | -8 ≤ h ≤ 12, -16 ≤ k ≤ 16, -24 ≤ l ≤ 25                                                          |
| Reflections collected                       | 58793                                                                                            |
| Independent reflections                     | 10952 [R <sub>int</sub> = 0.0651]                                                                |
| Data/restraints/parameters                  | 10952/0/563                                                                                      |
| Goodness-of-fit on F <sup>2</sup>           | 1.064                                                                                            |
| Final R indexes [I ≥ 2 $\sigma$ (I)]        | R <sub>1</sub> = 0.0521, wR <sub>2</sub> = 0.1298                                                |
| Final R indexes [all data]                  | R <sub>1</sub> = 0.0920, wR <sub>2</sub> = 0.1585                                                |
| Largest diff. peak/hole / e Å <sup>-3</sup> | 1.130/-1.240                                                                                     |

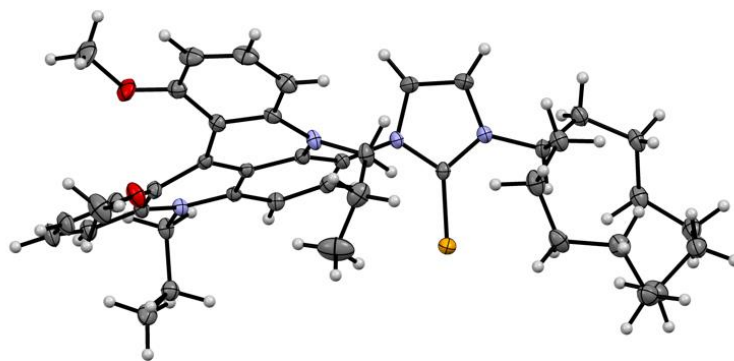

Compound **4**(PF<sub>6</sub>) (CCDC 2061397)

Table S3. Crystal data and structure refinement for compound **4**(PF<sub>6</sub>).

|                                             |                                                                                                  |
|---------------------------------------------|--------------------------------------------------------------------------------------------------|
| Empirical formula                           | C <sub>51</sub> H <sub>67</sub> Cl <sub>3</sub> F <sub>6</sub> N <sub>4</sub> O <sub>4</sub> PRh |
| Formula weight                              | 1122.31                                                                                          |
| Temperature/K                               | 150(2)                                                                                           |
| Crystal system                              | Monoclinic                                                                                       |
| Space group                                 | P 2 <sub>1</sub> /n                                                                              |
| a/Å                                         | 9.8537(11)                                                                                       |
| b/Å                                         | 22.588(3)                                                                                        |
| c/Å                                         | 22.749(3)                                                                                        |
| α/°                                         | 90                                                                                               |
| β/°                                         | 97.220(4)                                                                                        |
| γ/°                                         | 90                                                                                               |
| Volume/Å <sup>3</sup>                       | 5023.2(10)                                                                                       |
| Z                                           | 4                                                                                                |
| ρ <sub>calc</sub> /cm <sup>3</sup>          | 1.484                                                                                            |
| μ/mm <sup>-1</sup>                          | 0.598                                                                                            |
| F(000)                                      | 2328                                                                                             |
| Crystal size/mm <sup>3</sup>                | 0.600 × 0.080 × 0.070                                                                            |
| Radiation                                   | Mo-Kα (λ = 0.71073)                                                                              |
| 2θ range for data collection/°              | 2.980 to 27.485                                                                                  |
| Index ranges                                | -11 ≤ h ≤ 12, -29 ≤ k ≤ 29, -29 ≤ l ≤ 29                                                         |
| Reflections collected                       | 55032                                                                                            |
| Independent reflections                     | 11457 [R <sub>int</sub> = 0.0839]                                                                |
| Data/restraints/parameters                  | 11457/4/515                                                                                      |
| Goodness-of-fit on F <sup>2</sup>           | 1.306                                                                                            |
| Final R indexes [I ≥ 2σ (I)]                | R <sub>1</sub> = 0.1684, wR <sub>2</sub> = 0.3600                                                |
| Final R indexes [all data]                  | R <sub>1</sub> = 0.1891, wR <sub>2</sub> = 0.3689                                                |
| Largest diff. peak/hole / e Å <sup>-3</sup> | 1.899/-5.368                                                                                     |

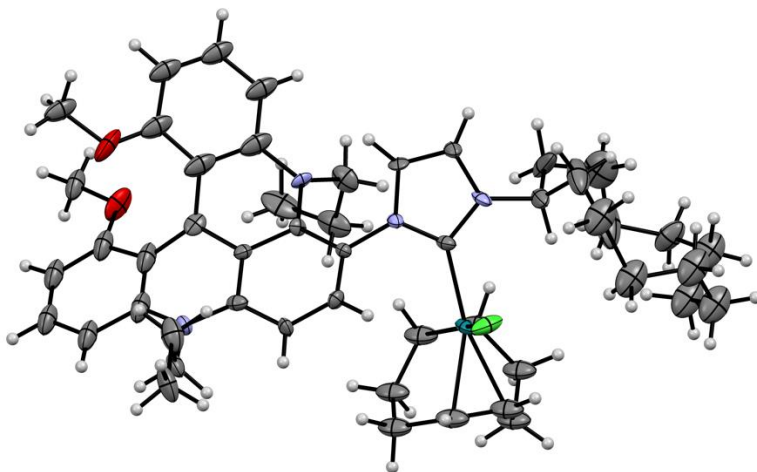

$^1\text{H}$ ,  $^{13}\text{C}$ ,  $^{19}\text{F}$ ,  $^{31}\text{P}$  NMR spectra of new compounds

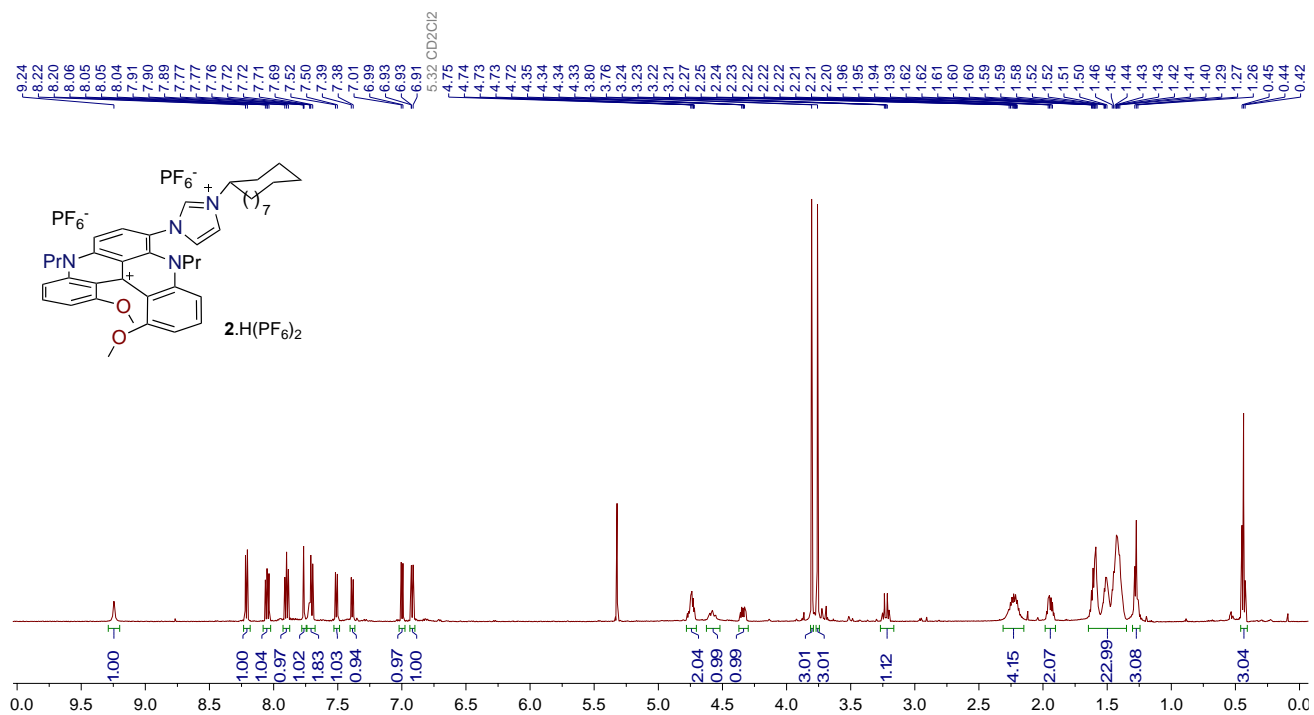

Figure S20.  $^1\text{H}$  NMR (600 MHz, CD<sub>2</sub>Cl<sub>2</sub>) spectrum of **2.H(PF<sub>6</sub>)<sub>2</sub>**

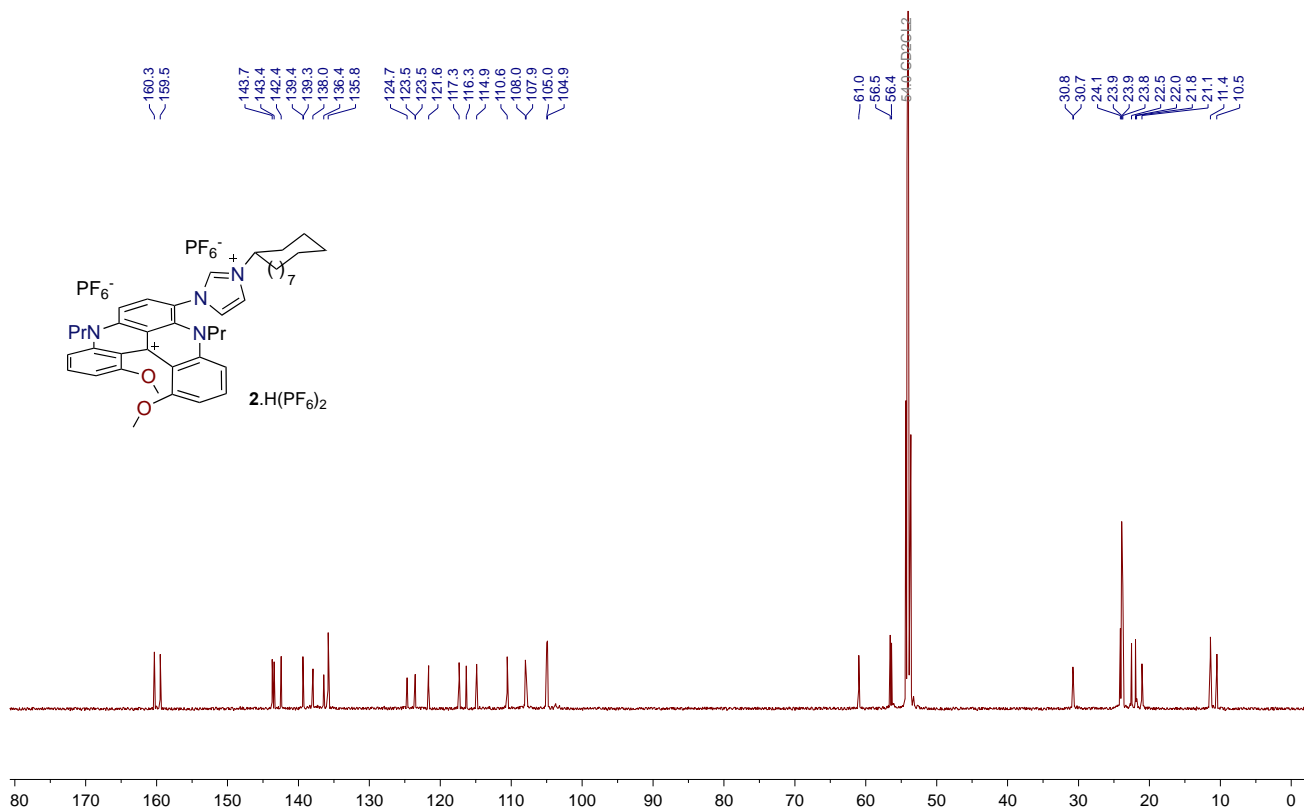

Figure S21.  $^{13}\text{C}$  NMR (151 MHz, CD<sub>2</sub>Cl<sub>2</sub>) spectrum of **2.H(PF<sub>6</sub>)<sub>2</sub>**

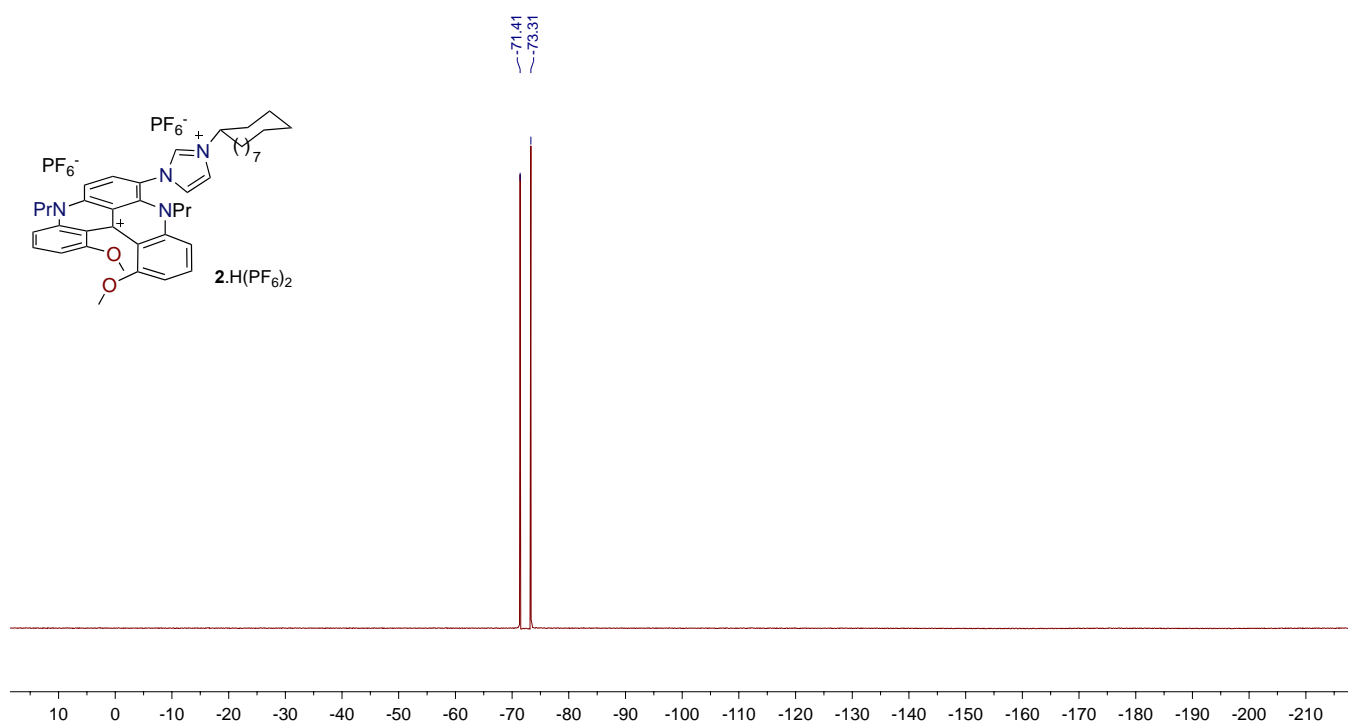

Figure S22. <sup>19</sup>F NMR (376 MHz, CD<sub>2</sub>Cl<sub>2</sub>) spectrum of **2.H(PF<sub>6</sub>)<sub>2</sub>**

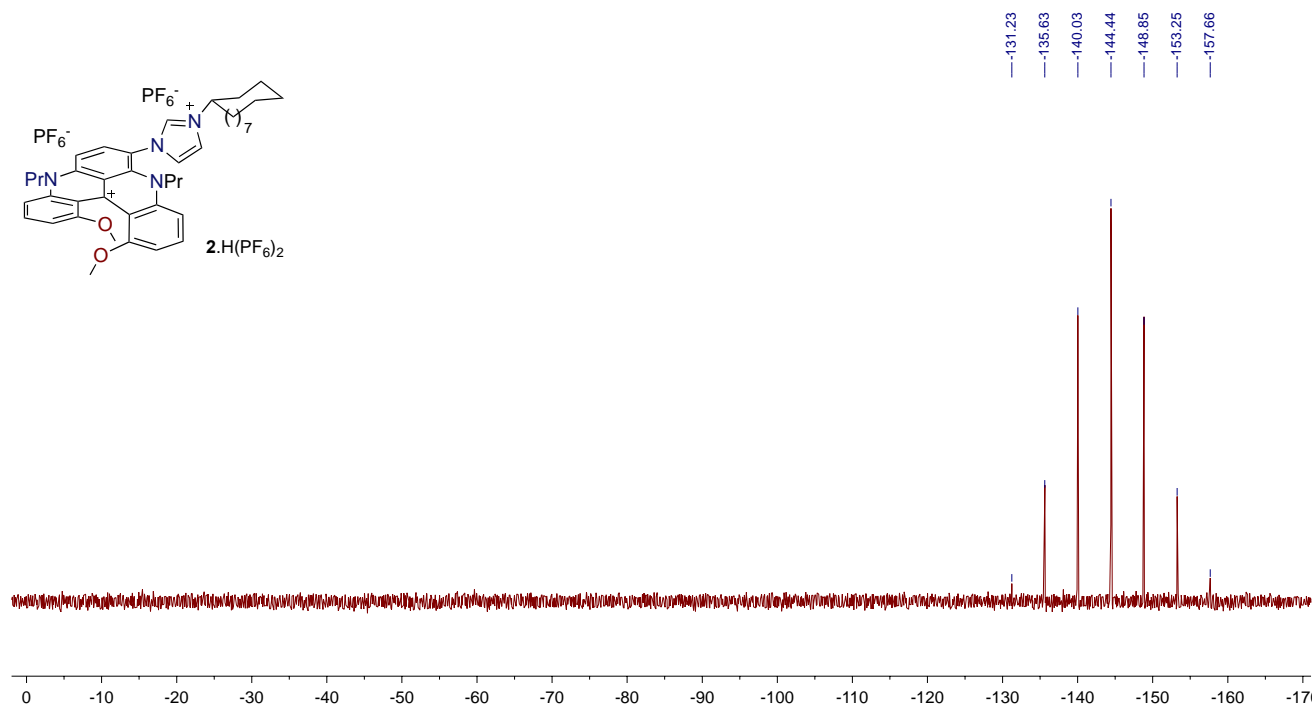

Figure S23. <sup>31</sup>P NMR (162 MHz, CD<sub>2</sub>Cl<sub>2</sub>) spectrum of **2.H(PF<sub>6</sub>)<sub>2</sub>**

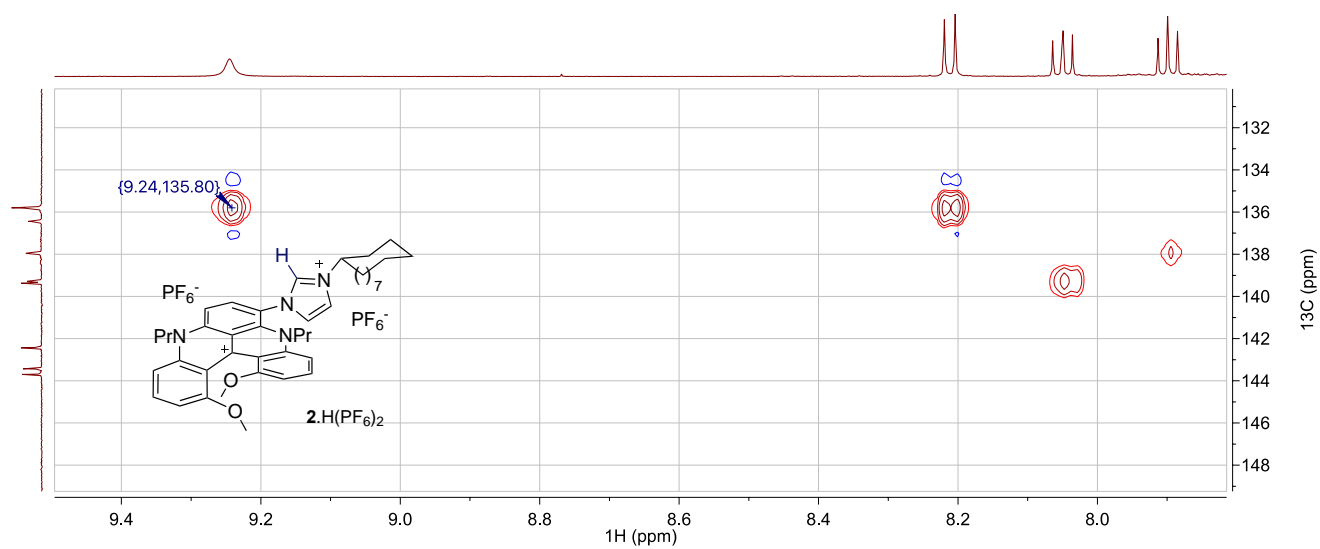

Figure S24. 2D HSQC spectrum zoom of **2.H(PF<sub>6</sub>)<sub>2</sub>**

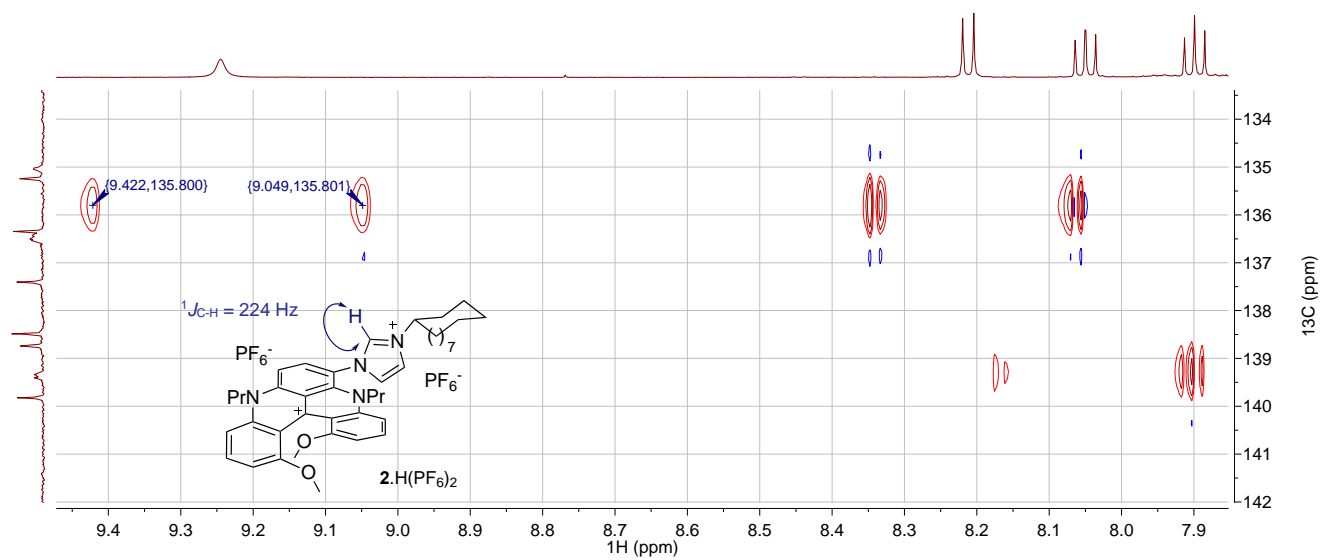

Figure S25. 600.47 MHz 2D HSQC <sup>1</sup>J<sub>CH</sub> spectrum zoom of **2.H(PF<sub>6</sub>)<sub>2</sub>**

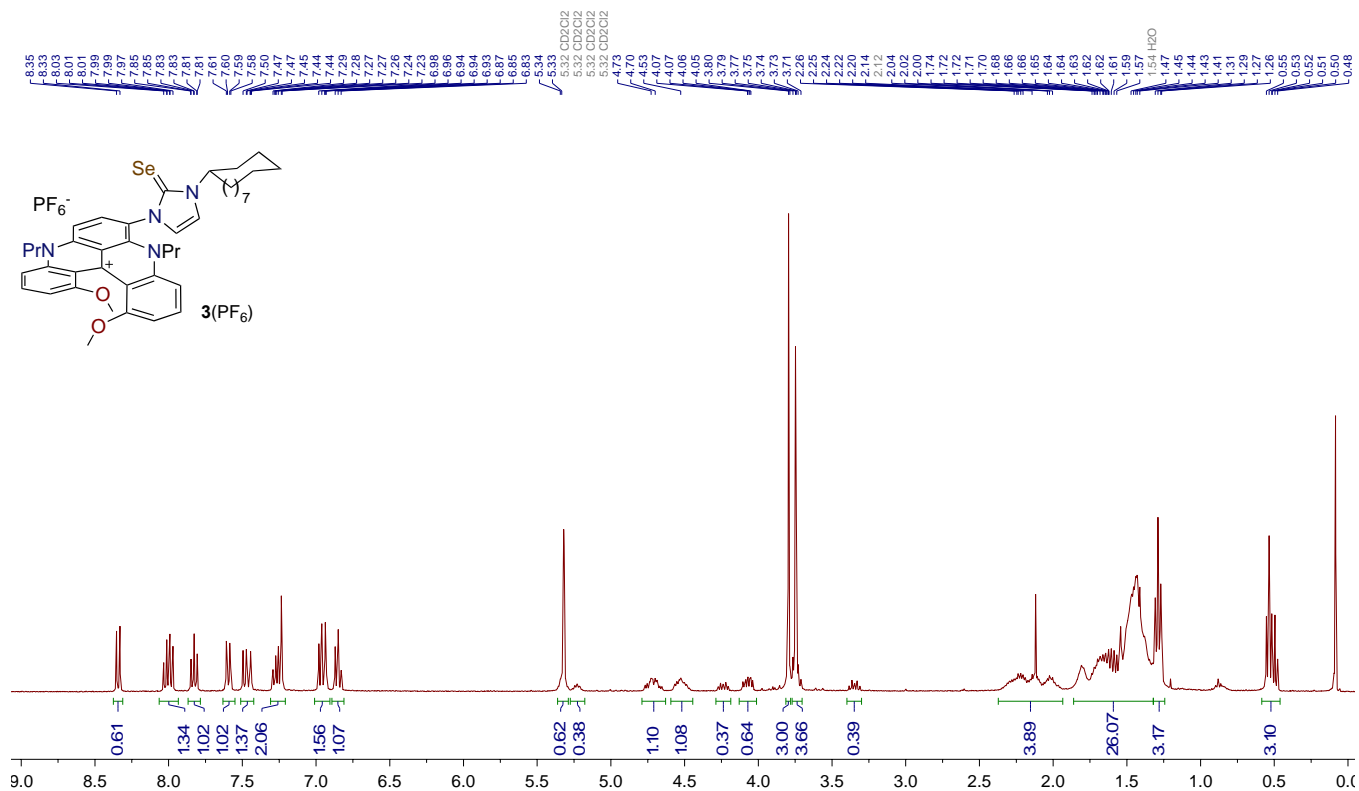

Figure S26. <sup>1</sup>H NMR (400 MHz, CD<sub>2</sub>Cl<sub>2</sub>) spectrum of **3(PF<sub>6</sub>)**

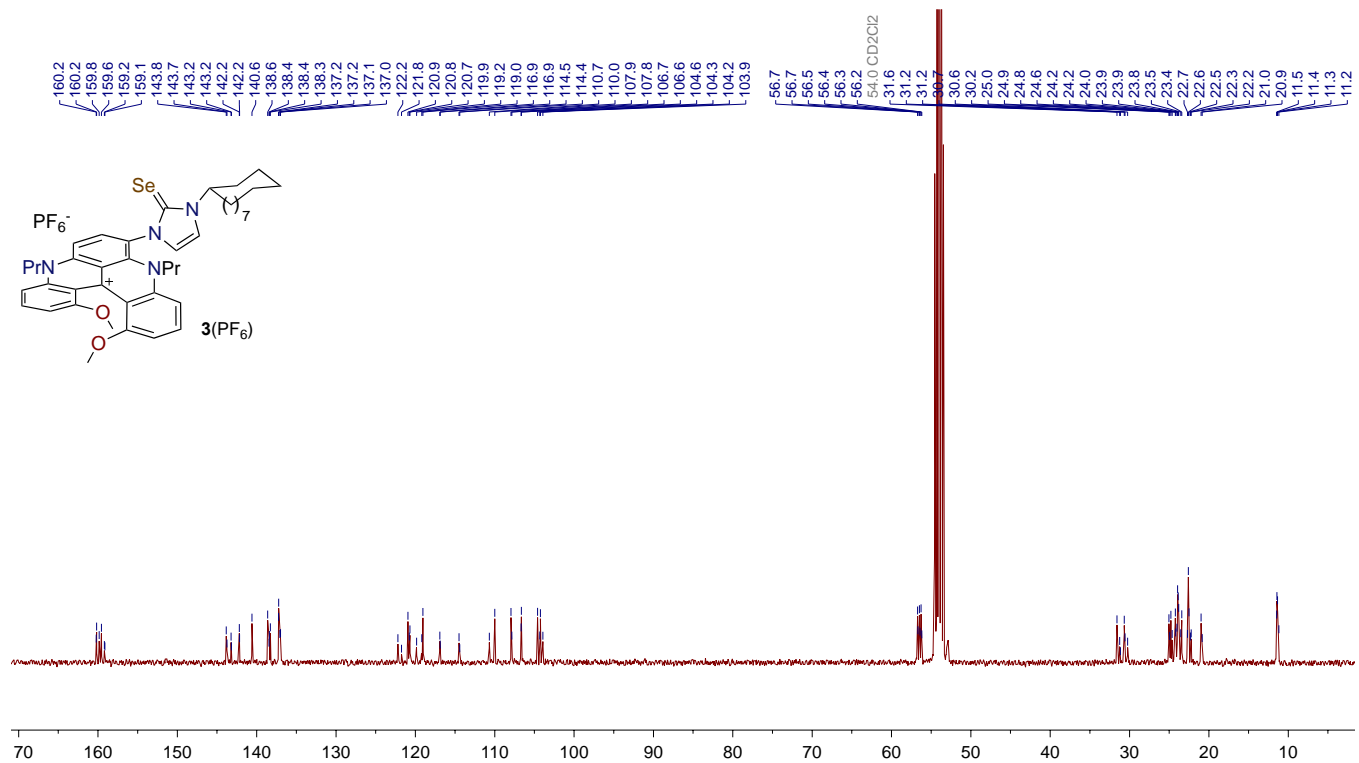

Figure S27. <sup>13</sup>C NMR (101 MHz, CD<sub>2</sub>Cl<sub>2</sub>) spectrum of **3(PF<sub>6</sub>)**

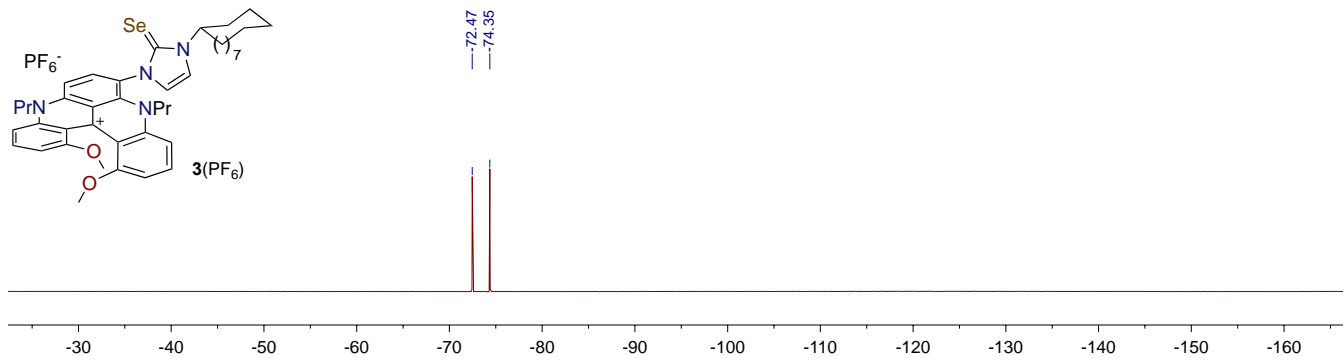

Figure S28. <sup>19</sup>F NMR (376 MHz, CD<sub>2</sub>Cl<sub>2</sub>) spectrum of **3**(PF<sub>6</sub>)

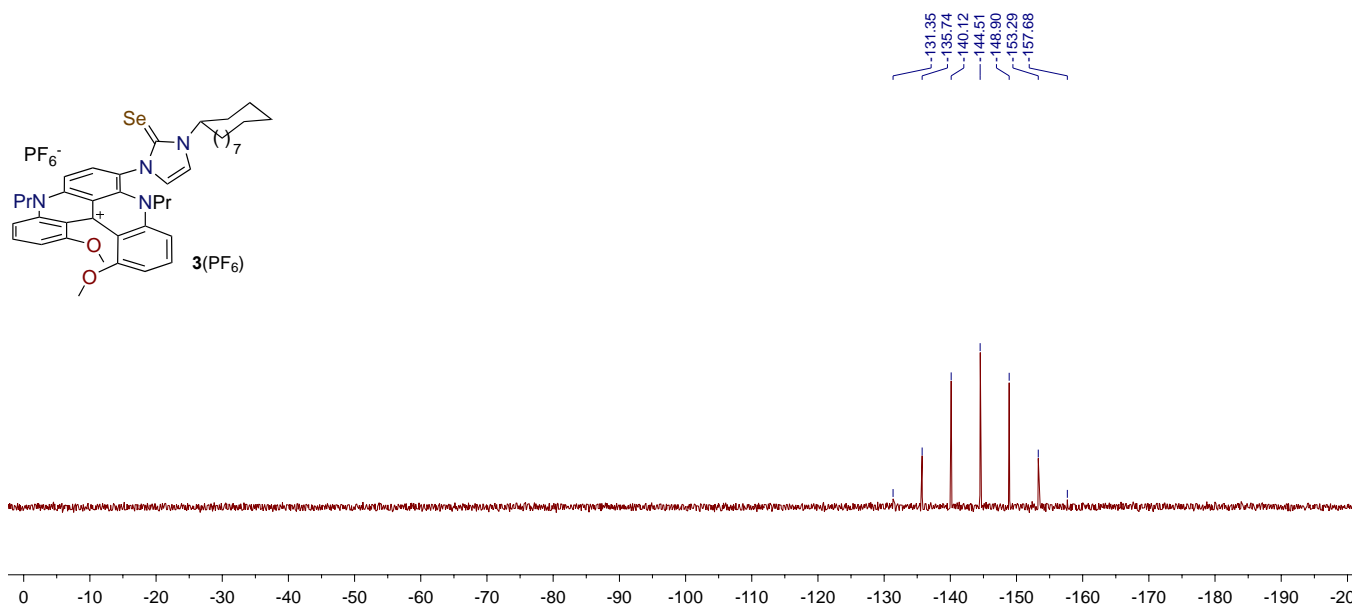

Figure S29. <sup>31</sup>P NMR (162 MHz, CD<sub>2</sub>Cl<sub>2</sub>) spectrum of **3**(PF<sub>6</sub>)

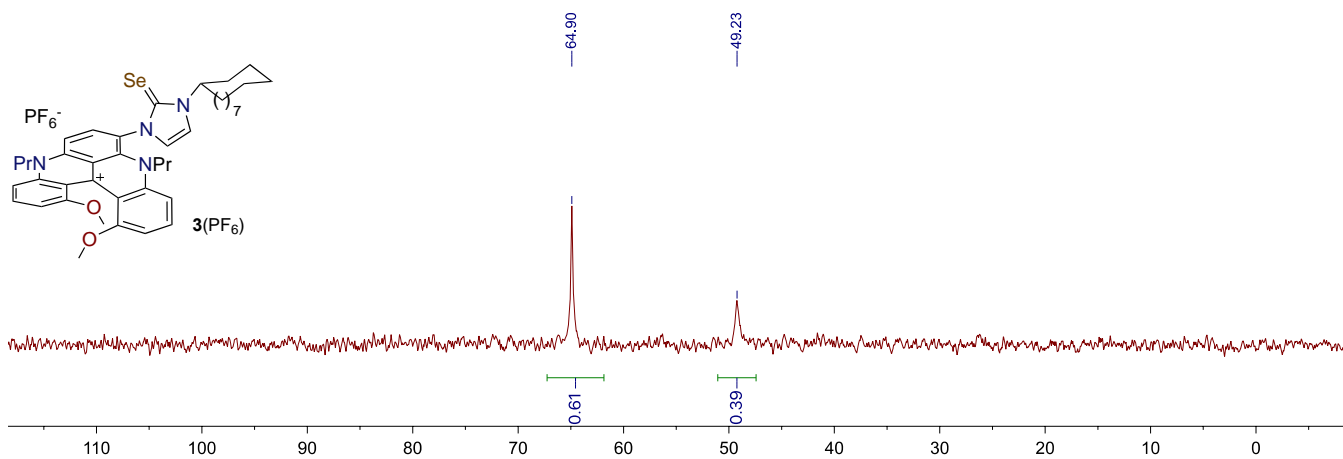

Figure S30. <sup>77</sup>Se NMR (76 MHz, CD<sub>2</sub>Cl<sub>2</sub>) spectrum of **3**(PF<sub>6</sub>)

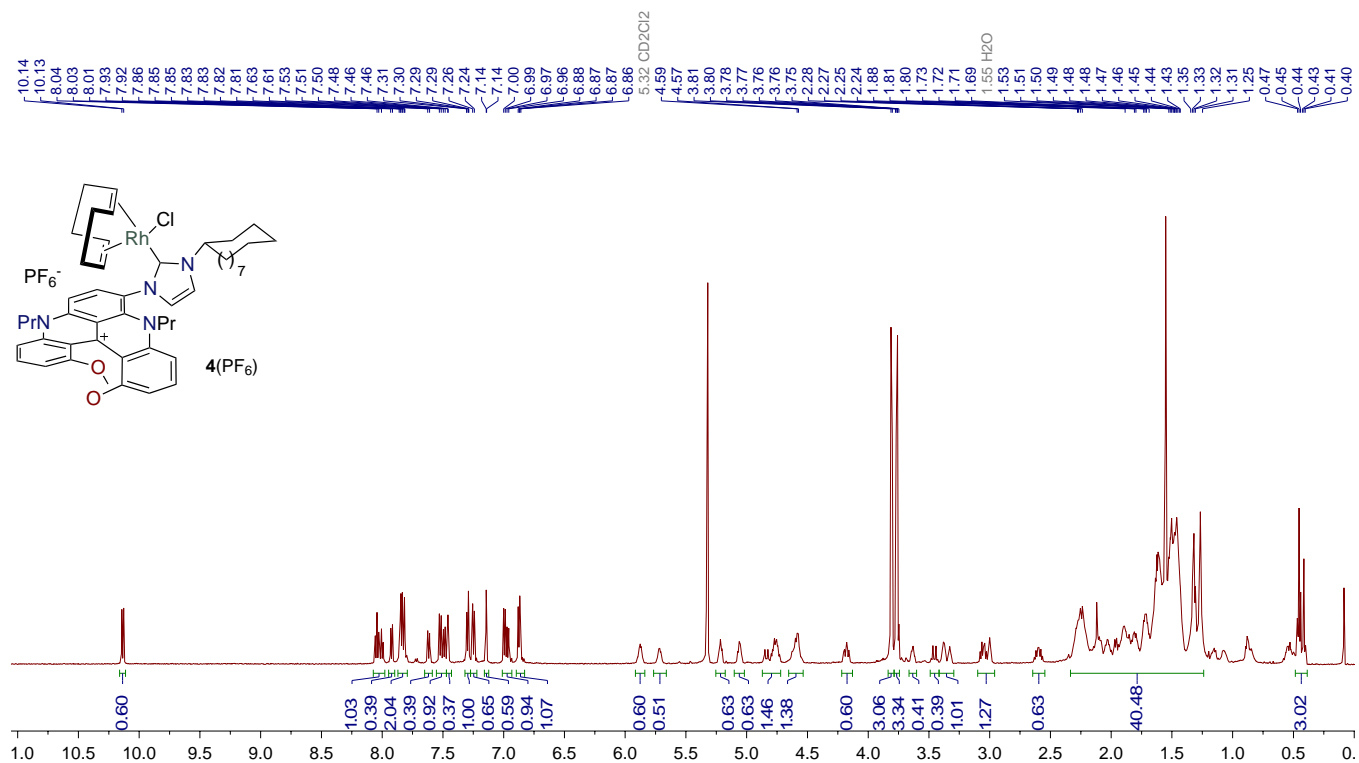

Figure S31. <sup>1</sup>H NMR (600 MHz, CD<sub>2</sub>Cl<sub>2</sub>) spectrum of **4**(PF<sub>6</sub>)

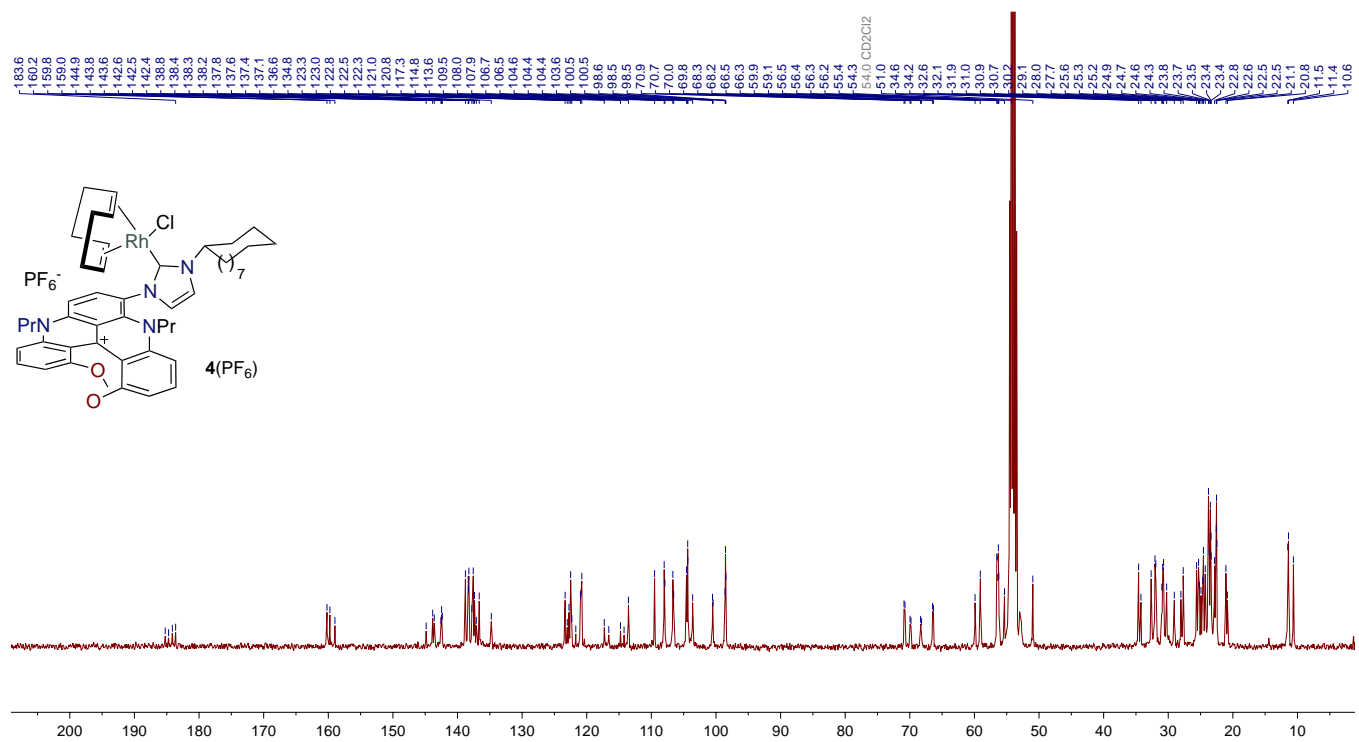

Figure S32. <sup>13</sup>C NMR (101 MHz, CD<sub>2</sub>Cl<sub>2</sub>) spectrum of **4**(PF<sub>6</sub>)



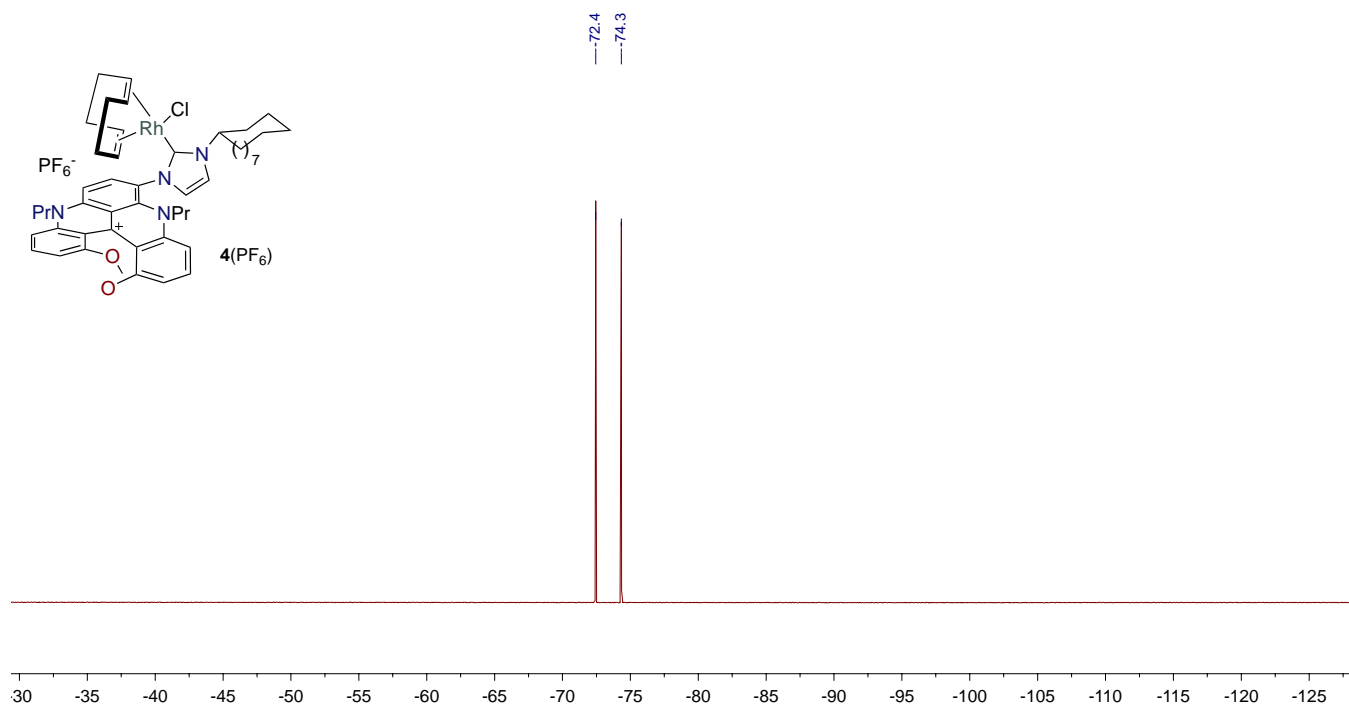

Figure S33. <sup>19</sup>F NMR (376 MHz, CD<sub>2</sub>Cl<sub>2</sub>) spectrum of **4**(PF<sub>6</sub>)

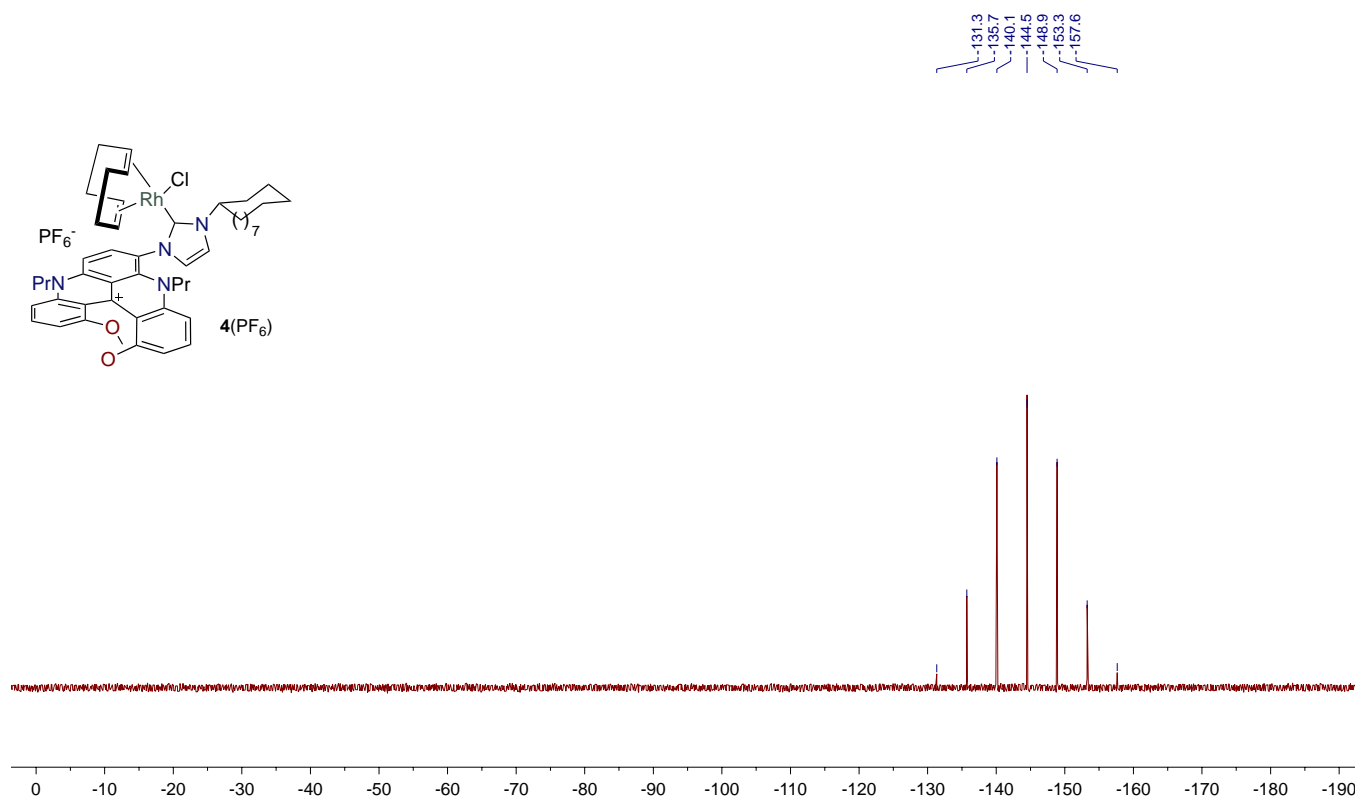

Figure S34. <sup>31</sup>P NMR (162 MHz, CD<sub>2</sub>Cl<sub>2</sub>) spectrum of **4**(PF<sub>6</sub>)

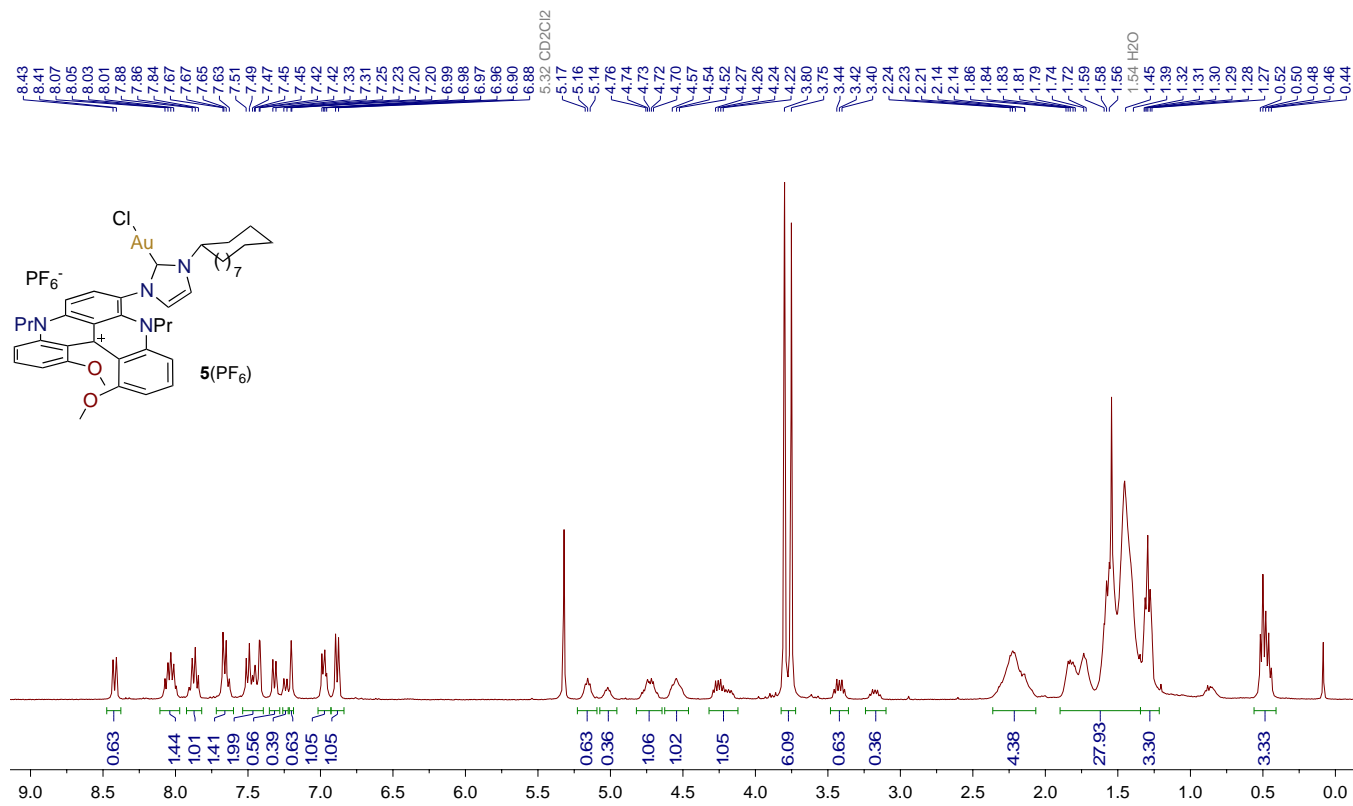

Figure S35. <sup>1</sup>H NMR (400 MHz, CD<sub>2</sub>Cl<sub>2</sub>) spectrum of 5(PF<sub>6</sub>)

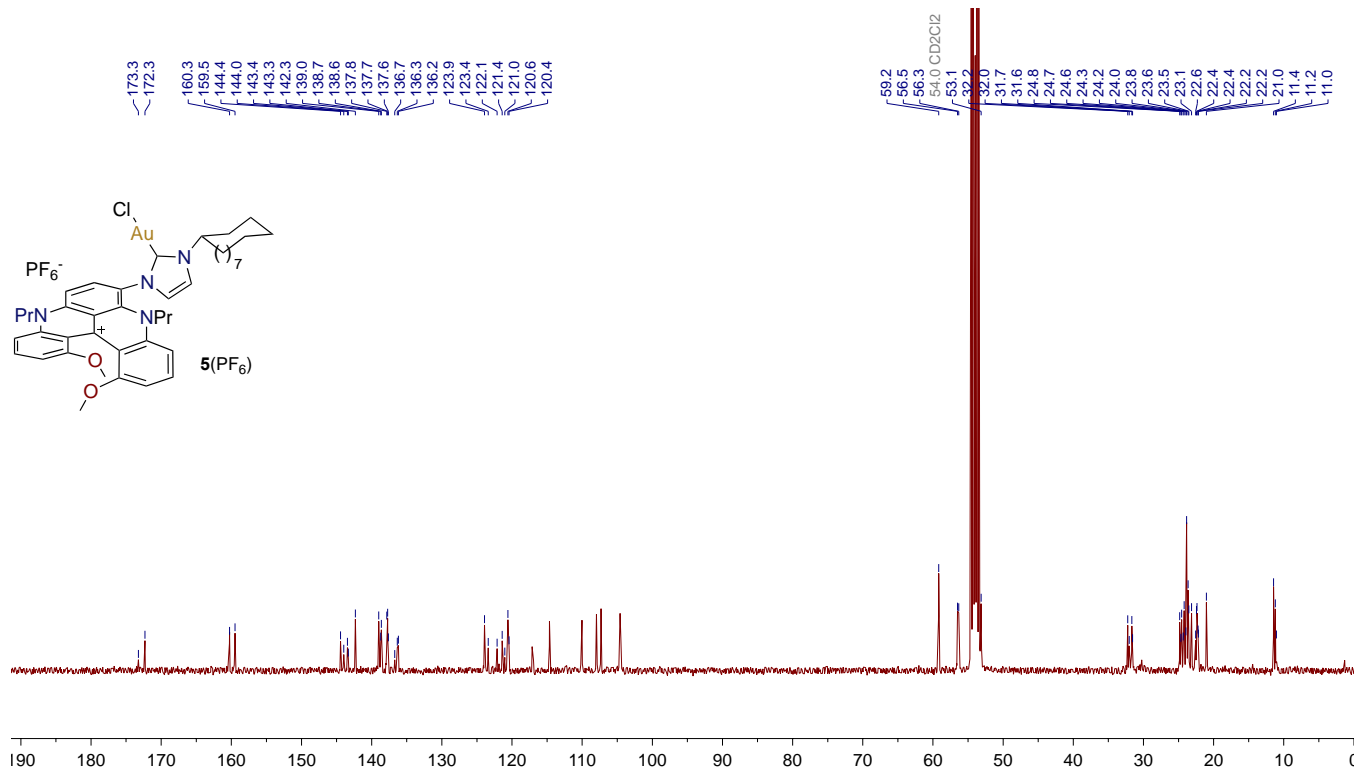

Figure S36. <sup>13</sup>C NMR (101 MHz, CD<sub>2</sub>Cl<sub>2</sub>) spectrum of 5(PF<sub>6</sub>)

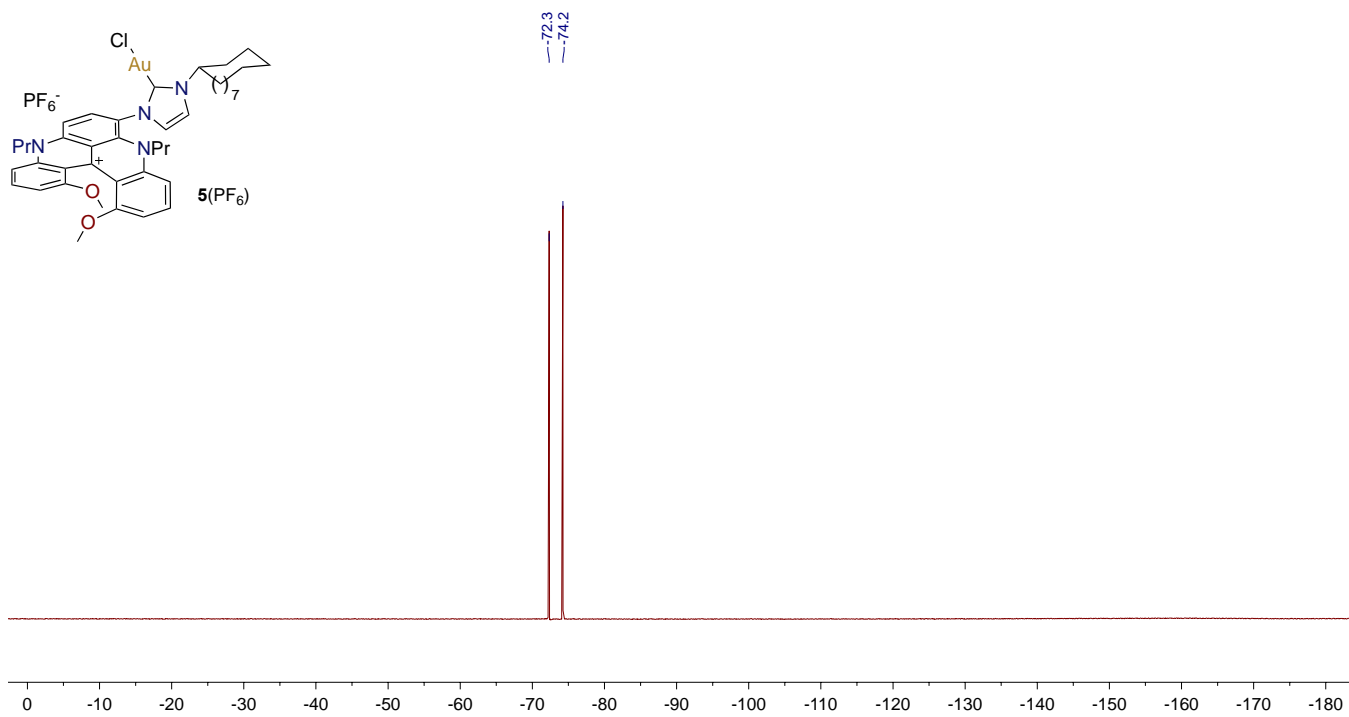

Figure S37. <sup>19</sup>F NMR (376 MHz, CD<sub>2</sub>Cl<sub>2</sub>) spectrum of **5(PF<sub>6</sub>)**

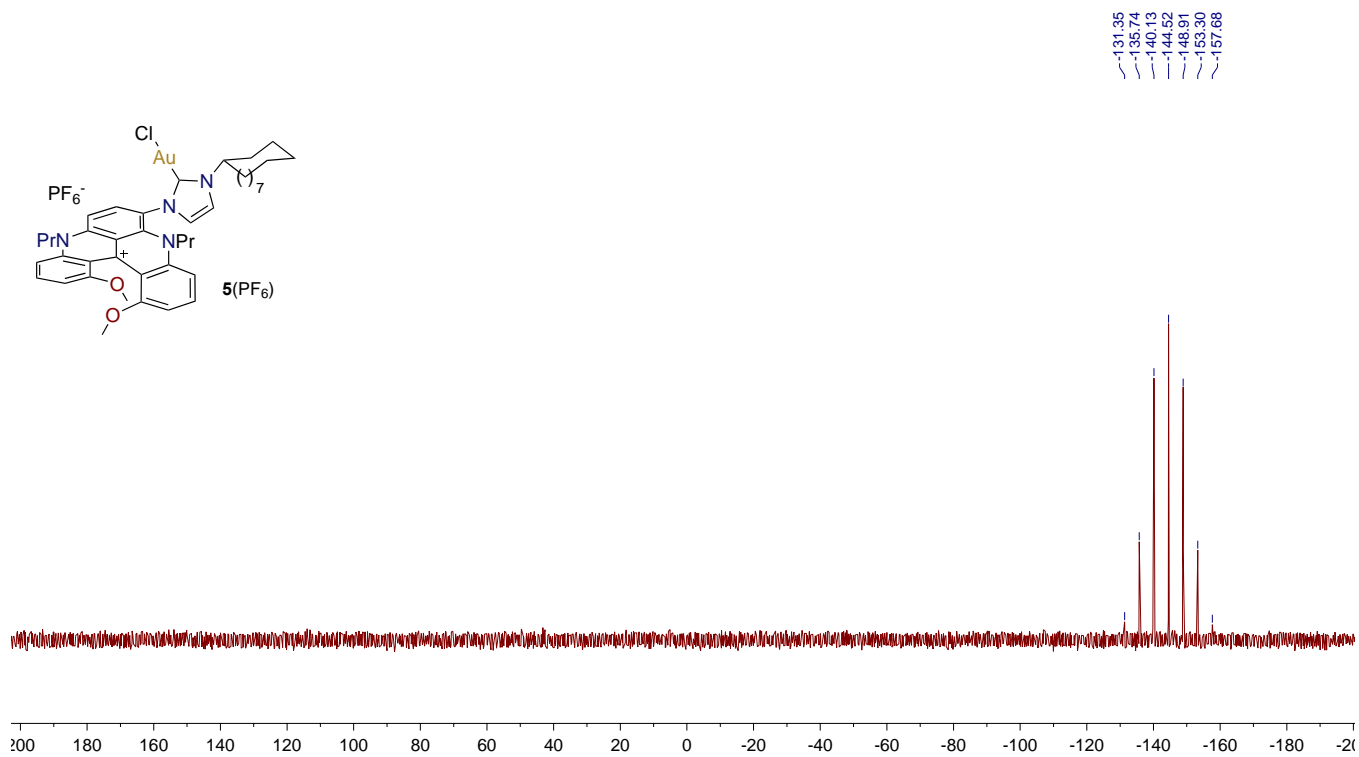

Figure S38. <sup>31</sup>P NMR (162 MHz, CD<sub>2</sub>Cl<sub>2</sub>) spectrum of **5(PF<sub>6</sub>)**

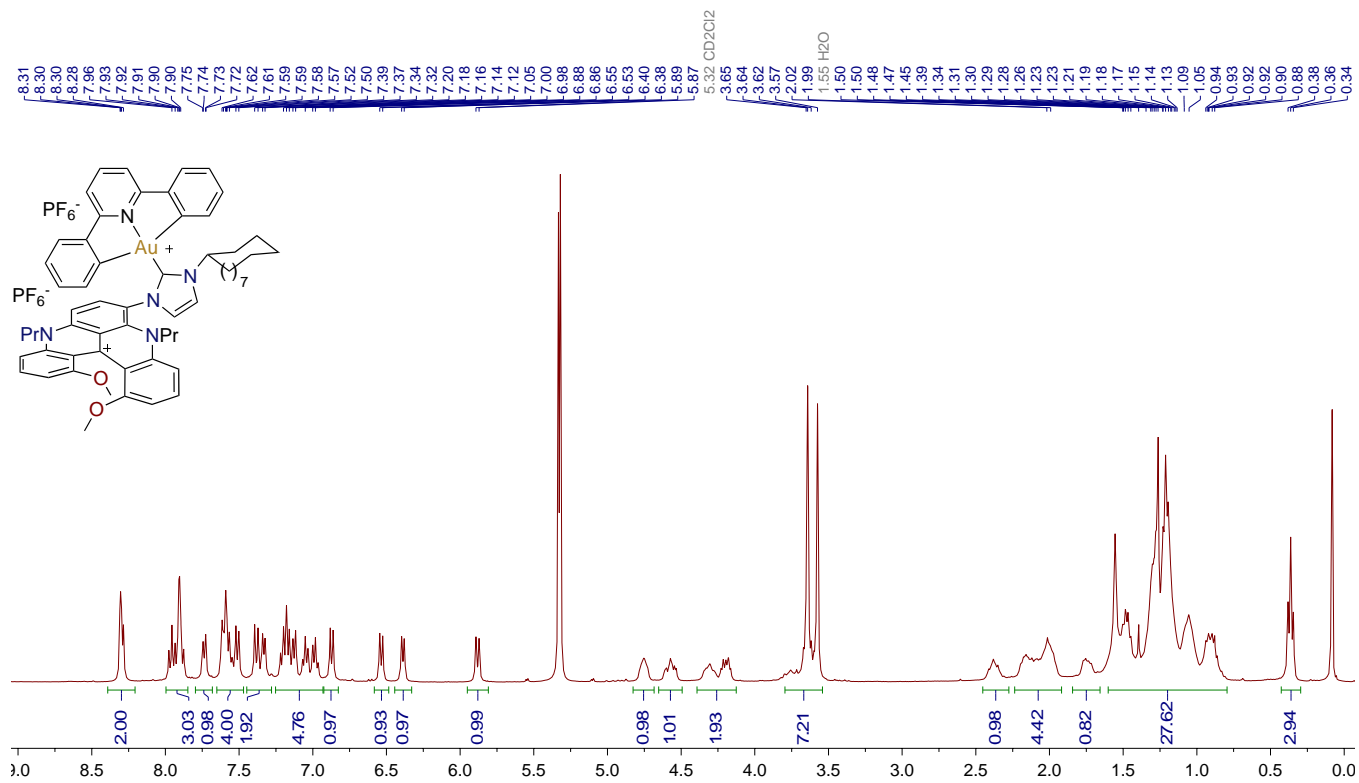

Figure S39.  $^1\text{H NMR}$  (400 MHz,  $\text{CD}_2\text{Cl}_2$ ) spectrum of **6**( $\text{PF}_6$ )<sub>2</sub>

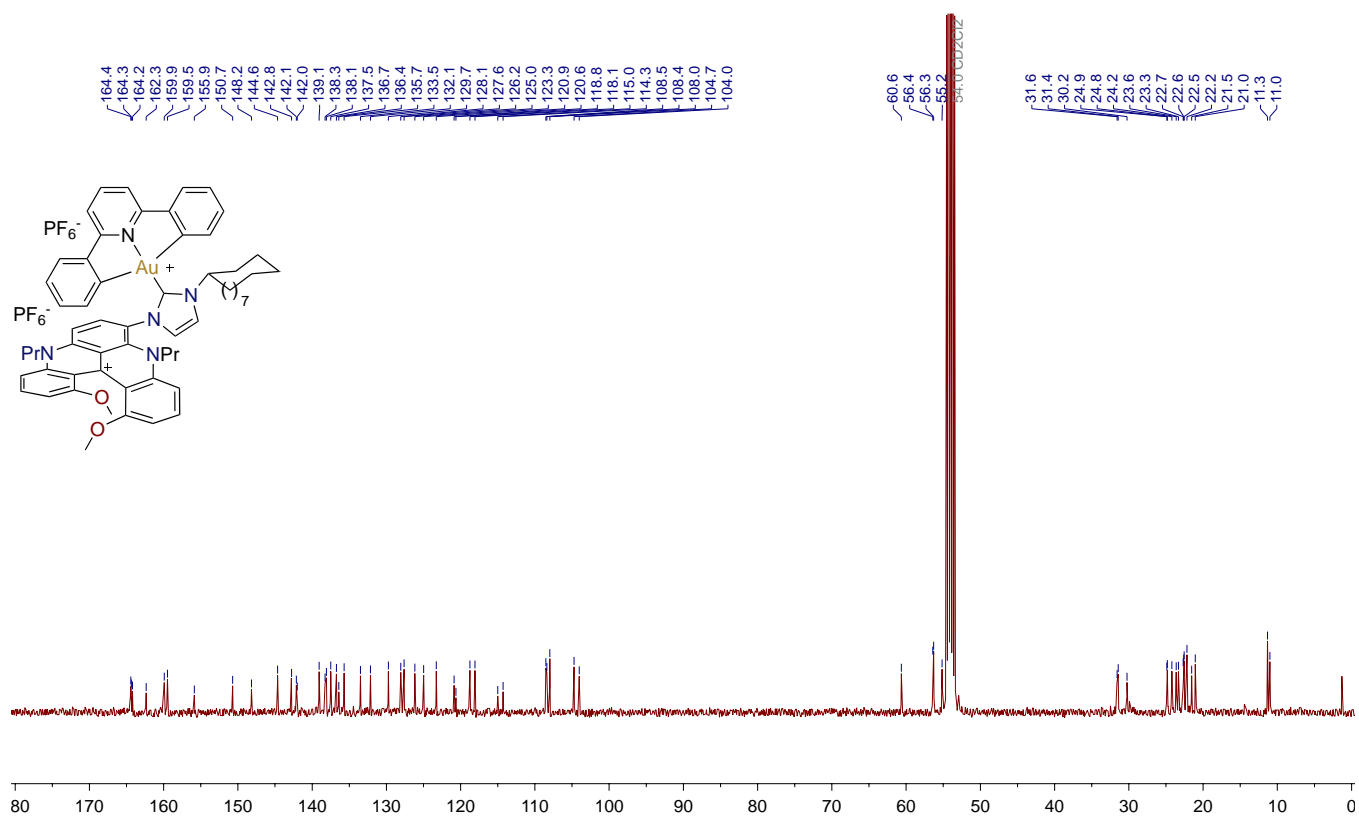

Figure S40.  $^{13}\text{C NMR}$  (101 MHz,  $\text{CD}_2\text{Cl}_2$ ) spectrum of **6**( $\text{PF}_6$ )<sub>2</sub>

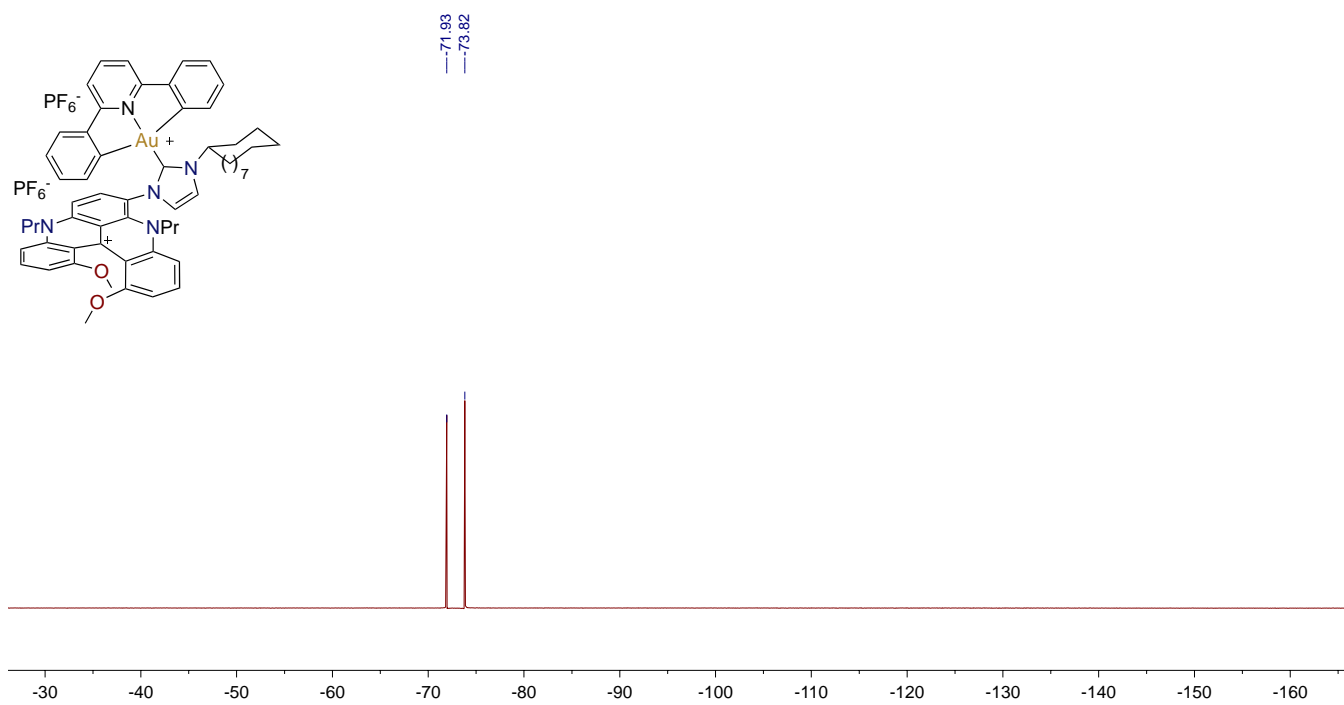

Figure S41.  $^{19}\text{F}$  NMR (376 MHz,  $\text{CD}_2\text{Cl}_2$ ) spectrum of **6**( $\text{PF}_6$ )<sub>2</sub>

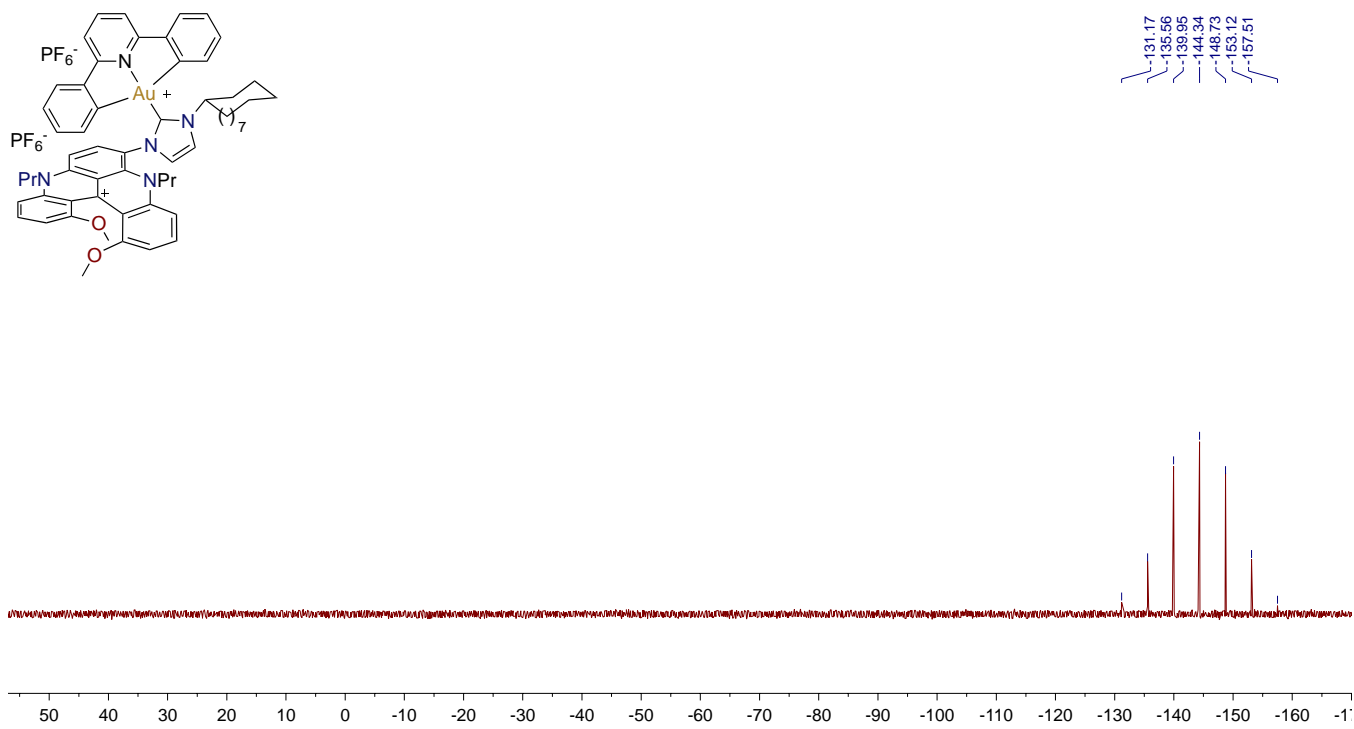

Figure S42.  $^{31}\text{P}$  NMR (162 MHz,  $\text{CD}_2\text{Cl}_2$ ) spectrum of **6**( $\text{PF}_6$ )<sub>2</sub>



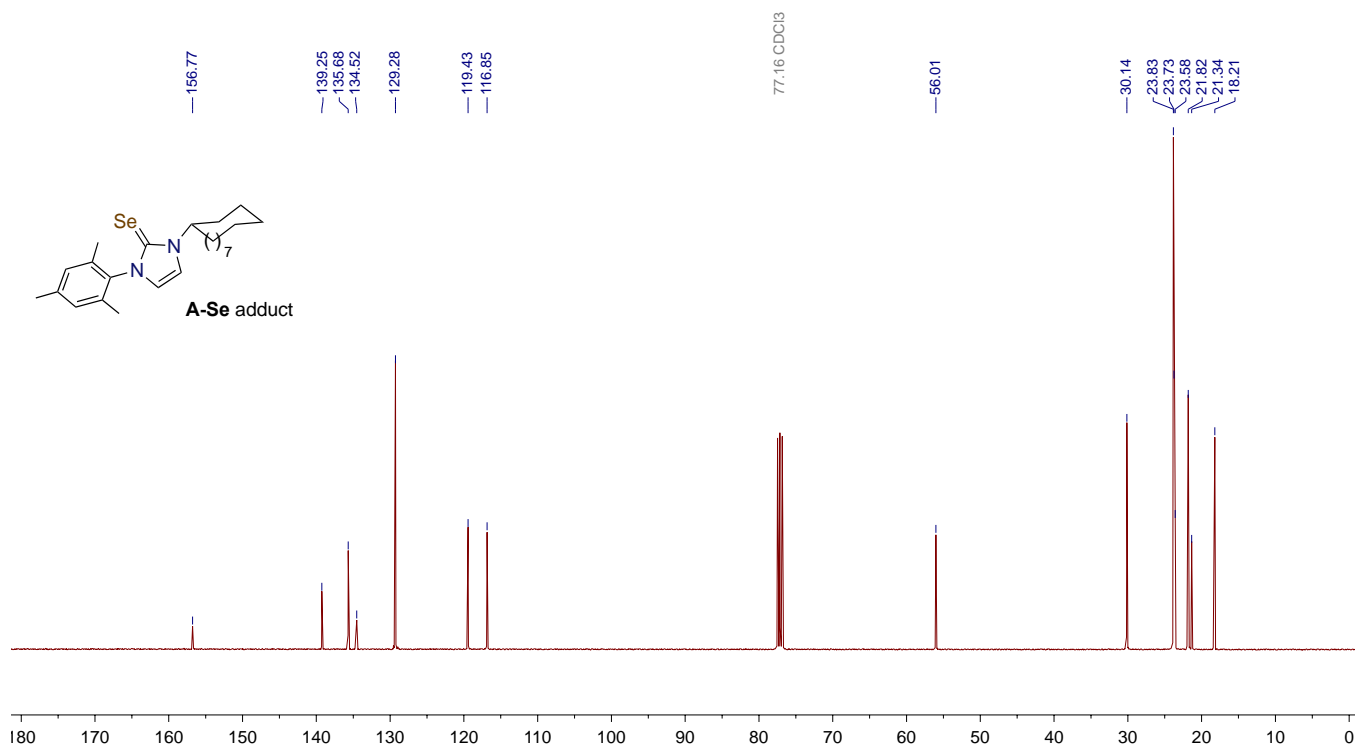

Figure S45.  $^{13}\text{C}$  NMR (101 MHz,  $\text{CDCl}_3$ ) spectrum of **A-Se adduct**

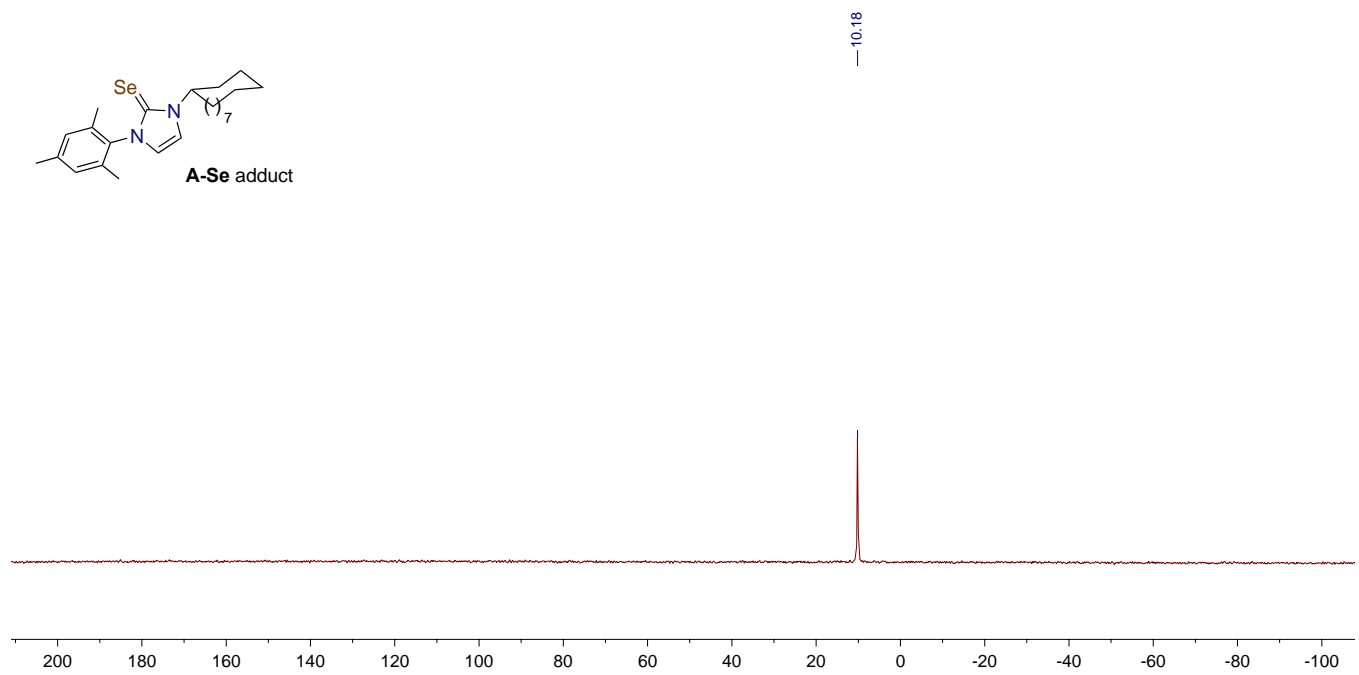

Figure S46.  $^{77}\text{Se}$  NMR (115 MHz,  $\text{CDCl}_3$ ) spectrum of **A-Se adduct**.

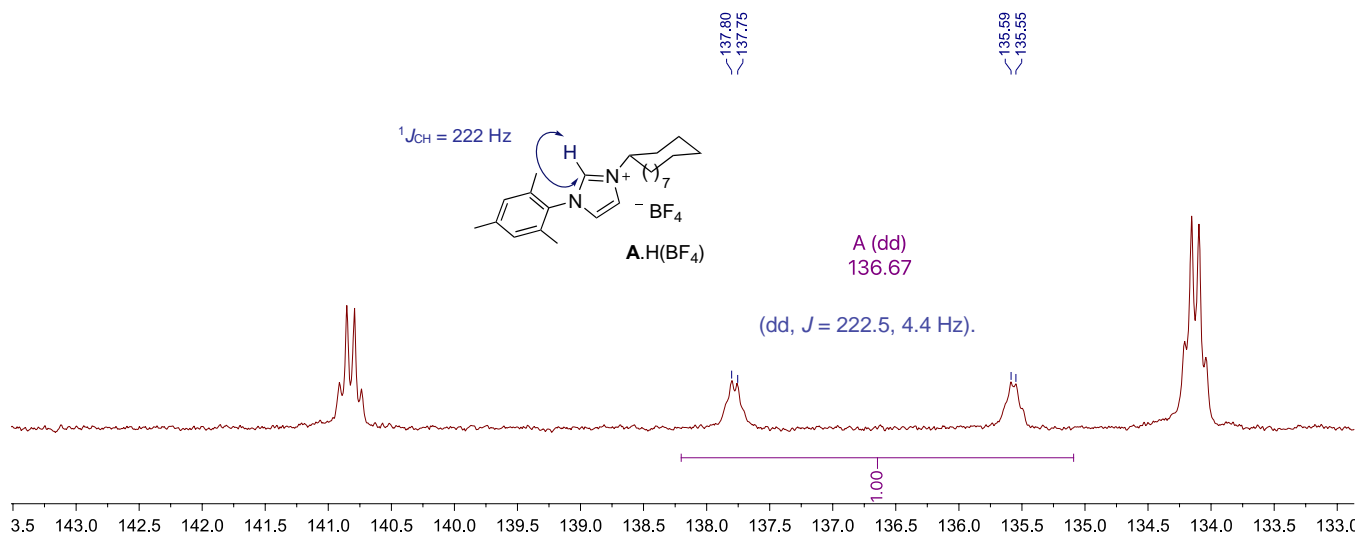

Figure S47.  ${}^{13}\text{C}$ - ${}^1\text{H}$  NMR spectrum zoom of **A.H**( $\text{BF}_4$ ) and  ${}^1J_{\text{CH}}$  coupling constant measurement.



## Energies and Cartesian coordinates

(aR)-(P)-3-(+)

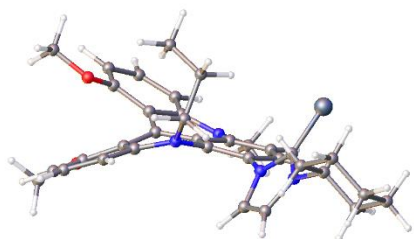

### Geometry optimization, B3LYP/6-311G\*\*, gas phase

```
SCF Done: E(RB3LYP) = -1696.93514806
Zero-point correction= 0.651844 (Hartree/Particle)
Thermal correction to Energy= 0.688608
Thermal correction to Enthalpy= 0.689553
Thermal correction to Gibbs Free Energy= 0.582138
Sum of electronic and zero-point Energies= -1696.283304
Sum of electronic and thermal Energies= -1696.246540
Sum of electronic and thermal Enthalpies= -1696.245595
Sum of electronic and thermal Free Energies= -1696.353010
```

### Cartesian coordinates:

|    |           |           |           |   |           |           |           |
|----|-----------|-----------|-----------|---|-----------|-----------|-----------|
| N  | 0.028279  | -3.988408 | 0.730582  | H | 3.609943  | 0.132258  | 5.330683  |
| C  | -0.004897 | -2.750759 | 0.121760  | H | -0.734398 | -4.323682 | 5.932255  |
| C  | 0.293831  | -1.597736 | 0.908905  | H | -0.903519 | -6.326286 | 4.520996  |
| C  | 0.608058  | -1.743619 | 2.278340  | H | -0.604025 | -6.203547 | 2.105523  |
| C  | 0.163356  | -2.949120 | 2.917776  | H | -0.934178 | -5.542791 | -0.366183 |
| C  | -0.076993 | -4.098667 | 2.108150  | H | 0.592690  | -5.984247 | 0.436632  |
| C  | 0.289420  | -0.292496 | 0.311743  | H | -0.157039 | 2.498572  | 0.031505  |
| C  | 0.087578  | -0.192345 | -1.071703 | H | -0.103976 | 2.711719  | 1.769196  |
| C  | -0.199300 | -1.340393 | -1.814462 | H | -2.404858 | 2.666545  | 0.865634  |
| C  | -0.262704 | -2.597992 | -1.244457 | H | -2.192469 | 1.036798  | 0.294130  |
| C  | 1.347216  | -0.665763 | 2.879703  | H | -1.854985 | 0.254785  | 2.710742  |
| C  | 1.200922  | 0.635570  | 2.319548  | H | -3.409625 | 1.049250  | 2.478904  |
| N  | 0.453338  | 0.800371  | 1.156283  | H | -2.083927 | 1.919819  | 3.253066  |
| C  | 2.282582  | -0.842863 | 3.949626  | H | 4.518128  | -1.996604 | 4.970506  |
| C  | 2.904748  | 0.254373  | 4.522047  | H | 3.590312  | -3.465497 | 5.368521  |
| C  | 2.647823  | 1.535053  | 4.020290  | H | 3.270752  | -1.951505 | 6.253239  |
| C  | 1.824531  | 1.737137  | 2.932288  | H | -1.536849 | -2.205763 | 6.501889  |
| C  | -0.424143 | -5.324777 | 2.704846  | H | -0.429964 | -0.820447 | 6.681952  |
| C  | -0.614243 | -5.384670 | 4.069523  | H | 0.170027  | -2.473978 | 6.972437  |
| C  | -0.505121 | -4.249538 | 4.879601  | C | -0.021212 | 3.544087  | -5.481714 |
| C  | -0.146843 | -3.036586 | 4.315164  | H | -1.724498 | 3.293560  | -4.188419 |
| N  | 0.246763  | 1.032520  | -1.777908 | C | -0.689296 | 4.505525  | -6.476624 |
| C  | -0.705391 | 1.621954  | -2.594182 | H | 1.043582  | 3.794847  | -5.393217 |
| N  | -0.074312 | 2.705558  | -3.141976 | H | -0.080474 | 2.513398  | -5.842522 |
| C  | 1.237736  | 2.777366  | -2.693744 | C | -0.701244 | 5.947023  | -5.950470 |
| C  | 1.448363  | 1.743115  | -1.854127 | H | -0.171918 | 4.453619  | -7.438543 |
| Se | -2.435815 | 1.051494  | -2.862860 | H | -1.718887 | 4.175320  | -6.659038 |
| C  | -0.692538 | 3.642063  | -4.103562 | C | -1.360145 | 6.032695  | -4.566784 |
| C  | -0.390070 | 2.021775  | 0.980235  | H | 0.329078  | 6.319824  | -5.886130 |
| C  | -1.890821 | 1.725499  | 1.087485  | H | -1.223509 | 6.599861  | -6.655348 |
| C  | -2.329322 | 1.207446  | 2.459345  | C | -0.695145 | 5.078614  | -3.562078 |
| O  | 2.545078  | -2.117545 | 4.298552  | H | -1.314840 | 7.056037  | -4.183926 |
| C  | 3.544524  | -2.382033 | 5.285584  | H | -2.423580 | 5.779574  | -4.652930 |
| O  | -0.132495 | -1.874507 | 4.992867  | H | 0.335287  | 5.408979  | -3.378956 |
| C  | -0.507687 | -1.860013 | 6.372483  | H | -1.218143 | 5.105547  | -2.601430 |
| C  | 0.069277  | -5.198216 | -0.101466 | C | 10.048142 | 7.815646  | -0.961704 |
| H  | 0.629101  | -4.985009 | -1.008816 | C | 10.640290 | 6.968769  | -1.892683 |
| H  | 2.326496  | 1.436454  | -1.314343 | C | 10.004878 | 6.774422  | -3.107886 |
| H  | 1.911265  | 3.551363  | -3.016469 | C | 8.797376  | 7.409402  | -3.413380 |
| H  | -0.366862 | -1.227071 | -2.876794 | C | 8.257663  | 8.281814  | -2.463396 |
| H  | -0.519967 | -3.442242 | -1.865558 | O | 7.099554  | 8.929707  | -2.747480 |
| H  | 1.723991  | 2.727890  | 2.514930  | H | 8.400711  | 9.154515  | -0.518149 |
| H  | 3.150249  | 2.384559  | 4.467869  |   |           |           |           |

TS-3

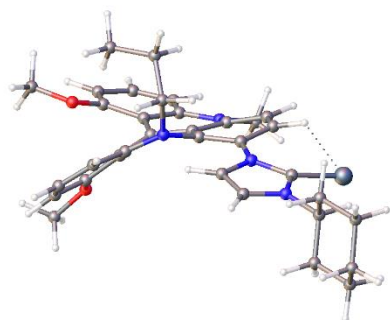

**Geometry optimization, B3LYP/6-311G\*\*, gas phase**

SCF Done: E(RB3LYP) = -1696.90882931  
 Zero-point correction= 0.651142 (Hartree/Particle)  
 Thermal correction to Energy= 0.687018  
 Thermal correction to Enthalpy= 0.687962  
 Thermal correction to Gibbs Free Energy= 0.582884  
 Sum of electronic and zero-point Energies= -1696.257687  
 Sum of electronic and thermal Energies= -1696.221812  
 Sum of electronic and thermal Enthalpies= -1696.220868  
 Sum of electronic and thermal Free Energies= -1696.325945

**Cartesian coordinates:**

|    |           |           |           |   |           |           |           |
|----|-----------|-----------|-----------|---|-----------|-----------|-----------|
| N  | 6.607083  | 8.878621  | 10.667452 | H | 5.097770  | 11.900722 | 7.619741  |
| C  | 6.347366  | 10.162202 | 10.228772 | H | 5.167322  | 9.654238  | 8.487118  |
| C  | 6.797371  | 11.263721 | 11.004479 | H | 7.984756  | 15.564177 | 12.890513 |
| C  | 7.449998  | 11.034694 | 12.239268 | H | 9.884803  | 15.237414 | 14.413304 |
| C  | 7.290603  | 9.740713  | 12.828398 | H | 10.875867 | 13.018991 | 14.755136 |
| C  | 6.924380  | 8.643775  | 11.991053 | H | 7.447214  | 7.993594  | 15.789117 |
| C  | 6.631457  | 12.600025 | 10.531642 | H | 7.063851  | 6.116577  | 14.246722 |
| C  | 6.233657  | 12.819433 | 9.195561  | H | 6.624600  | 6.498749  | 11.883169 |
| C  | 5.609084  | 11.726042 | 8.555428  | H | 5.465574  | 7.307820  | 9.778685  |
| C  | 5.659272  | 10.431455 | 9.039380  | H | 7.214702  | 7.002351  | 9.948485  |
| C  | 8.216521  | 12.142681 | 12.777359 | H | 5.197547  | 14.815962 | 10.797683 |
| C  | 7.775853  | 13.450711 | 12.459301 | H | 5.954566  | 15.387246 | 12.263176 |
| N  | 6.791462  | 13.625492 | 11.474466 | H | 3.635610  | 14.482879 | 12.526232 |
| C  | 9.395776  | 12.001382 | 13.561141 | H | 4.192320  | 12.890437 | 12.059607 |
| C  | 9.982125  | 13.111058 | 14.152963 | H | 5.634174  | 12.782944 | 14.146941 |
| C  | 9.418387  | 14.379957 | 13.942570 | H | 3.951859  | 13.115720 | 14.549333 |
| C  | 8.341582  | 14.564328 | 13.103335 | H | 5.137059  | 14.426353 | 14.564590 |
| C  | 6.882809  | 7.329689  | 12.506078 | H | 11.949676 | 11.139041 | 13.856111 |
| C  | 7.117407  | 7.127185  | 13.850607 | H | 11.370819 | 9.493191  | 14.218447 |
| C  | 7.350299  | 8.191507  | 14.727256 | H | 11.071970 | 10.805504 | 15.385323 |
| C  | 7.412137  | 9.480570  | 14.240961 | H | 6.650663  | 9.910974  | 16.819733 |
| N  | 6.432125  | 14.041196 | 8.485111  | H | 7.613222  | 11.410672 | 16.853078 |
| C  | 6.360329  | 14.210429 | 7.084573  | H | 8.436302  | 9.835122  | 16.748090 |
| N  | 6.738283  | 15.505059 | 6.864104  | C | 8.302706  | 16.319981 | 5.124324  |
| C  | 7.126289  | 16.110189 | 8.048326  | H | 6.357960  | 15.443779 | 4.850472  |
| C  | 6.952629  | 15.224971 | 9.047197  | C | 8.400329  | 16.958202 | 3.727745  |
| Se | 6.010848  | 13.013687 | 5.707605  | H | 8.824030  | 16.960200 | 5.850889  |
| C  | 6.838497  | 16.152530 | 5.534177  | H | 8.799835  | 15.348066 | 5.131740  |
| C  | 5.604153  | 14.493068 | 11.751348 | C | 7.626579  | 18.278681 | 3.647528  |
| C  | 4.500728  | 13.807529 | 12.570479 | H | 9.449094  | 17.114818 | 3.465693  |
| C  | 4.833500  | 13.517657 | 14.034711 | H | 8.001947  | 16.256395 | 2.980080  |
| O  | 9.912393  | 10.754888 | 13.643043 | C | 6.162328  | 18.101664 | 4.088068  |
| C  | 11.149264 | 10.553709 | 14.322459 | H | 8.109541  | 19.021749 | 4.295753  |
| O  | 7.502382  | 10.569038 | 15.029617 | H | 7.658169  | 18.682309 | 2.632470  |
| C  | 7.554877  | 10.407636 | 16.446219 | C | 6.067458  | 17.477553 | 5.491670  |
| C  | 6.467627  | 7.757770  | 9.727479  | H | 5.635867  | 19.057576 | 4.082240  |
| H  | 6.645353  | 8.122213  | 8.719611  | H | 5.645092  | 17.452577 | 3.373797  |
| H  | 7.211274  | 15.310317 | 10.082643 | H | 6.477751  | 18.182966 | 6.230879  |
| H  | 7.496134  | 17.119549 | 8.090216  | H | 5.015693  | 17.306342 | 5.766975  |

(aS)-(P)-3-(+)

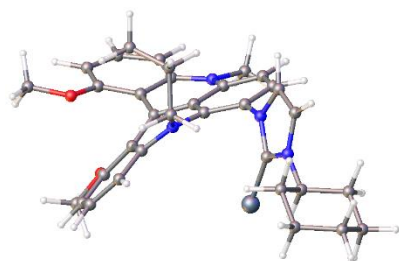

**Geometry optimization, B3LYP/6-311G\*\*, gas phase**

SCF Done: E(RB3LYP) = -1696.93518224  
Zero-point correction= 0.651766 (Hartree/Particle)  
Thermal correction to Energy= 0.688548  
Thermal correction to Enthalpy= 0.689492  
Thermal correction to Gibbs Free Energy= 0.581844  
Sum of electronic and zero-point Energies= -1696.283416  
Sum of electronic and thermal Energies= -1696.246634  
Sum of electronic and thermal Enthalpies= -1696.245690  
Sum of electronic and thermal Free Energies= -1696.353338

**Cartesian coordinates:**

|    |           |           |           |   |            |           |           |
|----|-----------|-----------|-----------|---|------------|-----------|-----------|
| N  | -1.043206 | -3.886289 | 0.861533  | H | -2.547957  | -0.880542 | -2.211464 |
| C  | -1.181624 | -2.612916 | 0.345895  | H | -2.556072  | -3.121512 | -1.247562 |
| C  | -0.450165 | -1.547521 | 0.953622  | H | 2.103410   | 2.449424  | 1.791836  |
| C  | 0.378742  | -1.817680 | 2.068248  | H | 4.140390   | 1.823325  | 2.974726  |
| C  | 0.087819  | -3.009097 | 2.816733  | H | 4.593684   | -0.509018 | 3.592186  |
| C  | -0.591775 | -4.074509 | 2.158239  | H | 0.330783   | -4.471436 | 5.912054  |
| C  | -0.533155 | -0.214519 | 0.431269  | H | -0.625267  | -6.355133 | 4.660888  |
| C  | -1.286254 | -0.003988 | -0.740865 | H | -1.312861  | -6.113724 | 2.334378  |
| C  | -1.988968 | -1.067979 | -1.302533 | H | -2.530098  | -5.278052 | 0.228160  |
| C  | -1.970095 | -2.347677 | -0.775798 | H | -0.864334  | -5.899836 | 0.314207  |
| C  | 1.429711  | -0.876747 | 2.319390  | H | -0.413260  | 2.633451  | 0.243859  |
| C  | 1.243893  | 0.463738  | 1.871509  | H | 0.175551   | 2.719312  | 1.890152  |
| N  | 0.103300  | 0.783761  | 1.145589  | H | -2.244564  | 3.207187  | 1.697475  |
| C  | 2.690568  | -1.229563 | 2.904201  | H | -2.555392  | 1.571802  | 1.164898  |
| C  | 3.638459  | -0.254156 | 3.157470  | H | -1.651130  | 0.686168  | 3.373606  |
| C  | 3.378629  | 1.073490  | 2.796512  | H | -3.011474  | 1.782753  | 3.605451  |
| C  | 2.214870  | 1.439962  | 2.155810  | H | -1.366250  | 2.349019  | 3.896538  |
| C  | -0.808092 | -5.295253 | 2.823562  | H | 4.965007   | -2.705148 | 2.886527  |
| C  | -0.436929 | -5.420337 | 4.146167  | H | 4.100074   | -4.070004 | 3.639210  |
| C  | 0.120409  | -4.354217 | 4.859348  | H | 4.388140   | -2.581339 | 4.576843  |
| C  | 0.360812  | -3.150597 | 4.216618  | H | 0.089098   | -2.327367 | 6.793495  |
| N  | -1.300217 | 1.227797  | -1.456043 | H | 1.326349   | -1.072053 | 6.527479  |
| C  | -0.213076 | 1.754084  | -2.139886 | H | 1.796099   | -2.791655 | 6.518053  |
| N  | -0.720091 | 2.818943  | -2.835906 | C | 0.059337   | 5.149746  | -3.218906 |
| C  | -2.086771 | 2.930055  | -2.621734 | H | 1.088843   | 3.305080  | -3.643342 |
| C  | -2.456879 | 1.945108  | -1.777881 | C | 0.907614   | 6.044628  | -4.136083 |
| Se | 1.516575  | 1.131309  | -2.107798 | H | -0.971314  | 5.526375  | -3.198310 |
| C  | 0.072224  | 3.698172  | -3.719738 | H | 0.435431   | 5.185472  | -2.192043 |
| C  | -0.464822 | 2.155202  | 1.219016  | C | 0.456707   | 5.945116  | -5.599618 |
| C  | -1.889625 | 2.175380  | 1.787347  | H | 0.853779   | 7.080168  | -3.788620 |
| C  | -1.981901 | 1.720581  | 3.246594  | H | 1.959409   | 5.744057  | -4.057745 |
| O  | 2.896228  | -2.544340 | 3.113025  | C | 0.456367   | 4.489707  | -6.086834 |
| C  | 4.171245  | -2.986119 | 3.583988  | H | -0.553700  | 6.362326  | -5.698135 |
| O  | 0.788336  | -2.041522 | 4.847148  | H | 1.106565   | 6.553816  | -6.234507 |
| C  | 1.009639  | -2.077167 | 6.258985  | C | -0.393534  | 3.587259  | -5.178679 |
| C  | -1.476255 | -5.037849 | 0.060485  | H | 0.083823   | 4.429730  | -7.113124 |
| H  | -1.318499 | -4.815733 | -0.992233 | H | 1.485545   | 4.111569  | -6.106964 |
| H  | -3.416914 | 1.697538  | -1.361164 | H | -1.4446908 | 3.885641  | -5.255393 |
| H  | -2.677788 | 3.703017  | -3.080179 | H | -0.329459  | 2.544514  | -5.502151 |

(aR)-(P)-3(-)

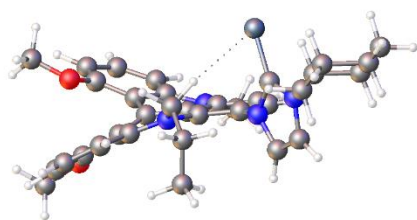

**Geometry optimization, B3LYP/6-311G\*\*, gas phase**

SCF Done: E(RB3LYP) = -1696.92689290  
Zero-point correction= 0.652787 (Hartree/Particle)  
Thermal correction to Energy= 0.689229  
Thermal correction to Enthalpy= 0.690173  
Thermal correction to Gibbs Free Energy= 0.584139  
Sum of electronic and zero-point Energies= -1696.274105  
Sum of electronic and thermal Energies= -1696.237664  
Sum of electronic and thermal Enthalpies= -1696.236720  
Sum of electronic and thermal Free Energies= -1696.342754

**Cartesian coordinates:**

|   |           |           |           |    |           |           |           |
|---|-----------|-----------|-----------|----|-----------|-----------|-----------|
| C | 7.365926  | 17.591575 | 6.285539  | C  | 6.218899  | 10.704825 | 16.323357 |
| C | 6.671704  | 16.230976 | 6.128740  | Se | 5.109399  | 14.396464 | 8.484131  |
| C | 6.483591  | 15.845226 | 4.654017  | H  | 7.706902  | 7.529559  | 9.032617  |
| C | 5.719108  | 16.944800 | 3.900665  | H  | 9.900158  | 13.213714 | 7.620734  |
| C | 6.399634  | 18.312419 | 4.048624  | H  | 9.324062  | 15.273607 | 5.904881  |
| C | 6.595144  | 18.682256 | 5.525250  | H  | 7.085254  | 11.419224 | 7.214914  |
| N | 7.389484  | 15.172730 | 6.868973  | H  | 6.728079  | 9.198213  | 8.154196  |
| C | 6.834310  | 14.391540 | 7.843839  | H  | 9.287173  | 14.998319 | 13.011557 |
| N | 7.857274  | 13.557199 | 8.267379  | H  | 10.349114 | 14.437097 | 15.118637 |
| C | 8.998008  | 13.783137 | 7.487991  | H  | 10.547664 | 12.105591 | 15.877257 |
| C | 8.706126  | 14.790967 | 6.641244  | H  | 5.766552  | 8.289292  | 15.827813 |
| C | 7.646945  | 12.360313 | 9.028682  | H  | 5.493413  | 6.329405  | 14.374291 |
| C | 7.847652  | 12.218599 | 10.421136 | H  | 6.063835  | 6.424097  | 12.003201 |
| C | 7.631757  | 10.909342 | 10.989360 | H  | 6.044053  | 7.148241  | 9.541138  |
| C | 7.239805  | 9.805587  | 10.167281 | H  | 7.441970  | 6.518878  | 10.446217 |
| C | 7.058484  | 9.997707  | 8.799067  | H  | 7.029834  | 14.677061 | 10.323429 |
| C | 7.252108  | 11.258902 | 8.272763  | H  | 7.542658  | 15.096347 | 11.918609 |
| C | 7.812357  | 10.689697 | 12.374904 | H  | 9.076796  | 16.471740 | 10.958308 |
| C | 7.152464  | 9.546357  | 12.951249 | H  | 8.789800  | 15.805317 | 9.376994  |
| C | 6.848174  | 8.444305  | 12.104919 | H  | 10.882844 | 14.805686 | 11.386483 |
| N | 7.094644  | 8.560624  | 10.746491 | H  | 11.136716 | 15.587005 | 9.830630  |
| N | 8.186073  | 13.242918 | 11.293753 | H  | 10.489639 | 13.952456 | 9.898334  |
| C | 8.697003  | 12.957791 | 12.553293 | H  | 11.282379 | 9.909745  | 15.581568 |
| C | 8.616410  | 11.637597 | 13.079133 | H  | 10.168167 | 8.525844  | 15.719443 |
| C | 6.288736  | 7.268440  | 12.636035 | H  | 9.826380  | 10.028857 | 16.616260 |
| C | 5.947132  | 7.227361  | 13.971818 | H  | 5.145250  | 10.501139 | 16.291909 |
| C | 6.113601  | 8.336291  | 14.806319 | H  | 6.387994  | 11.725891 | 16.657250 |
| C | 6.688637  | 9.494322  | 14.306674 | H  | 6.710278  | 10.008446 | 17.008984 |
| C | 9.273732  | 13.974240 | 13.344629 | H  | 5.691402  | 16.274001 | 6.609348  |
| C | 9.886776  | 13.649833 | 14.534786 | H  | 7.464041  | 15.695800 | 4.184238  |
| C | 9.983899  | 12.326602 | 14.983200 | H  | 5.948273  | 14.893383 | 4.593798  |
| C | 9.368435  | 11.322501 | 14.260033 | H  | 5.633051  | 16.672309 | 2.845169  |
| C | 7.056947  | 7.369722  | 9.889764  | H  | 4.696164  | 17.002469 | 4.291272  |
| C | 7.896570  | 14.670738 | 10.981338 | H  | 7.375341  | 18.290219 | 3.546544  |
| C | 9.054530  | 15.531459 | 10.398564 | H  | 5.809074  | 19.082337 | 3.544351  |
| C | 10.465297 | 14.928815 | 10.386502 | H  | 7.126013  | 19.634112 | 5.614598  |
| O | 9.465826  | 10.013496 | 14.557975 | H  | 5.616003  | 18.826181 | 5.997421  |
| C | 10.236337 | 9.610900  | 15.692307 | H  | 8.389281  | 17.534522 | 5.893714  |
| O | 6.790938  | 10.634424 | 15.014599 | H  | 7.441501  | 17.843717 | 7.347537  |

(aS)-(P)-3(-)

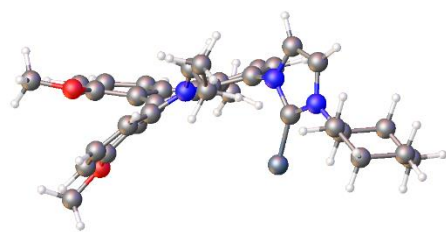

**Geometry optimization, B3LYP/6-311G\*\*, gas phase**

SCF Done: E(RB3LYP) = -1696.93123708  
Zero-point correction= 0.652190 (Hartree/Particle)  
Thermal correction to Energy= 0.688882  
Thermal correction to Enthalpy= 0.689826  
Thermal correction to Gibbs Free Energy= 0.582194  
Sum of electronic and zero-point Energies= -1696.279047  
Sum of electronic and thermal Energies= -1696.242355  
Sum of electronic and thermal Enthalpies= -1696.241411  
Sum of electronic and thermal Free Energies= -1696.349043

**Cartesian coordinates:**

|    |           |           |           |   |           |           |           |
|----|-----------|-----------|-----------|---|-----------|-----------|-----------|
| C  | 9.659801  | 11.020613 | 13.981876 | O | 9.756665  | 9.682195  | 14.082620 |
| C  | 8.739753  | 11.503686 | 12.993532 | C | 10.719607 | 9.117839  | 14.975772 |
| C  | 8.789128  | 12.883074 | 12.638162 | H | 6.893871  | 8.012047  | 8.682592  |
| C  | 9.501251  | 13.776220 | 13.464055 | H | 5.869247  | 14.983843 | 8.334763  |
| C  | 10.283498 | 13.283072 | 14.485833 | H | 7.399694  | 16.572253 | 6.702760  |
| C  | 10.414548 | 11.909397 | 14.724248 | H | 6.472780  | 12.067005 | 7.418357  |
| C  | 7.779874  | 10.678727 | 12.329145 | H | 5.903053  | 9.824830  | 8.203165  |
| C  | 7.389582  | 11.080284 | 11.030619 | H | 9.493579  | 14.835860 | 13.275545 |
| C  | 7.633067  | 12.424591 | 10.583902 | H | 10.855309 | 13.977255 | 15.090441 |
| N  | 8.110746  | 13.333465 | 11.514430 | H | 11.109189 | 11.560830 | 15.473954 |
| C  | 6.784486  | 10.123492 | 10.156981 | H | 6.254506  | 7.883376  | 15.756091 |
| C  | 6.401996  | 10.509192 | 8.871915  | H | 5.611499  | 6.157181  | 14.132488 |
| C  | 6.695997  | 11.788828 | 8.441279  | H | 5.739969  | 6.570125  | 11.731244 |
| C  | 7.320295  | 12.738288 | 9.245476  | H | 5.325958  | 7.615304  | 9.428580  |
| C  | 7.160216  | 9.492735  | 12.862518 | H | 6.824700  | 6.828961  | 9.980332  |
| C  | 6.643148  | 8.530600  | 11.948815 | H | 6.853310  | 14.847107 | 10.822673 |
| N  | 6.643449  | 8.822240  | 10.594657 | H | 7.421675  | 15.037580 | 12.461900 |
| C  | 6.123383  | 7.309788  | 12.416651 | H | 8.976359  | 15.668585 | 9.909873  |
| C  | 6.031728  | 7.089734  | 13.774815 | H | 9.760875  | 15.586528 | 11.453776 |
| C  | 6.409613  | 8.064388  | 14.702894 | H | 7.390425  | 17.442272 | 10.791693 |
| C  | 6.945206  | 9.264004  | 14.261582 | H | 9.077786  | 17.936339 | 10.914908 |
| N  | 7.749089  | 13.929371 | 8.586862  | H | 8.217771  | 17.382609 | 12.351797 |
| C  | 9.023404  | 14.062921 | 8.052715  | H | 11.732148 | 9.429553  | 14.705615 |
| N  | 8.956838  | 15.179289 | 7.262340  | H | 10.626162 | 8.040557  | 14.860207 |
| C  | 7.667063  | 15.695093 | 7.264940  | H | 10.509359 | 9.396004  | 16.012722 |
| C  | 6.910171  | 14.920330 | 8.070040  | H | 5.880041  | 10.005507 | 16.647001 |
| C  | 10.079109 | 15.701495 | 6.455299  | H | 7.234671  | 11.133556 | 16.910991 |
| C  | 9.831806  | 15.472772 | 4.956613  | H | 7.530485  | 9.376065  | 16.938059 |
| C  | 11.014635 | 15.994774 | 4.126698  | H | 10.933702 | 15.096130 | 6.767033  |
| C  | 11.319418 | 17.466575 | 4.436586  | H | 9.481939  | 17.785858 | 6.553450  |
| C  | 11.550755 | 17.685513 | 5.938003  | H | 10.575042 | 17.285093 | 7.842727  |
| C  | 10.366475 | 17.174991 | 6.774328  | H | 11.717598 | 18.745427 | 6.149247  |
| Se | 10.454849 | 12.952199 | 8.358351  | H | 12.461853 | 17.158843 | 6.246414  |
| C  | 6.394409  | 7.757820  | 9.614439  | H | 10.480461 | 18.090714 | 4.102995  |
| C  | 7.740600  | 14.777330 | 11.449213 | H | 12.195043 | 17.796299 | 3.870500  |
| C  | 8.800518  | 15.782949 | 10.975520 | H | 10.800295 | 15.864352 | 3.062349  |
| C  | 8.343604  | 17.214450 | 11.277752 | H | 11.900405 | 15.385341 | 4.342341  |
| O  | 7.232275  | 10.291892 | 15.082113 | H | 8.914471  | 15.993113 | 4.652586  |
| C  | 6.946416  | 10.178395 | 16.478218 | H | 9.674042  | 14.405924 | 4.775156  |

(aR)-(P)-4

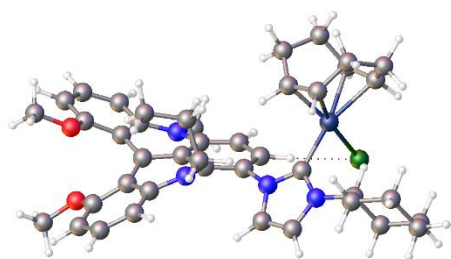

**Geometry optimization, B3LYP/6-311G\*\*, gas phase**

SCF Done: E(RB3LYP) = -2570.59686179  
Zero-point correction= 0.835190 (Hartree/Particle)  
Thermal correction to Energy= 0.881827  
Thermal correction to Enthalpy= 0.882771  
Thermal correction to Gibbs Free Energy= 0.754565  
Sum of electronic and zero-point Energies= -2569.761672  
Sum of electronic and thermal Energies= -2569.715035  
Sum of electronic and thermal Enthalpies= -2569.714091  
Sum of electronic and thermal Free Energies= -2569.842297

**Cartesian coordinates:**

|    |           |           |           |    |           |           |           |
|----|-----------|-----------|-----------|----|-----------|-----------|-----------|
| C  | 6.229828  | 17.419083 | 5.931588  | H  | 6.360546  | 6.412672  | 14.822734 |
| C  | 6.472463  | 15.936531 | 5.609583  | H  | 6.636864  | 6.494135  | 12.397835 |
| C  | 7.437009  | 15.752069 | 4.426775  | H  | 6.313948  | 7.069887  | 9.889676  |
| C  | 6.926566  | 16.510222 | 3.190972  | H  | 7.847512  | 6.737798  | 10.736938 |
| C  | 6.677074  | 17.994737 | 3.495434  | H  | 6.186432  | 14.809946 | 10.044882 |
| C  | 5.722911  | 18.167292 | 4.686838  | H  | 6.782351  | 15.553366 | 11.510842 |
| N  | 6.946444  | 15.191729 | 6.797720  | H  | 4.309252  | 15.170434 | 11.455340 |
| C  | 6.344864  | 14.075304 | 7.285124  | H  | 4.563990  | 13.439012 | 11.371441 |
| N  | 7.166660  | 13.677955 | 8.322107  | H  | 5.572360  | 13.459334 | 13.692077 |
| C  | 8.271439  | 14.531154 | 8.435639  | H  | 3.968580  | 14.192803 | 13.689101 |
| C  | 8.123067  | 15.476457 | 7.481194  | H  | 5.404237  | 15.219933 | 13.748732 |
| C  | 7.046590  | 12.460735 | 9.055633  | H  | 11.543679 | 11.078843 | 15.142593 |
| C  | 7.213737  | 12.403988 | 10.450251 | H  | 10.715154 | 9.557949  | 15.575430 |
| C  | 7.284079  | 11.116799 | 11.083271 | H  | 10.296617 | 11.070145 | 16.426656 |
| C  | 7.066206  | 9.925443  | 10.322225 | H  | 5.552781  | 10.528252 | 16.742931 |
| C  | 6.838746  | 10.029590 | 8.944741  | H  | 6.581586  | 11.981762 | 16.869175 |
| C  | 6.864106  | 11.273304 | 8.331787  | H  | 7.285523  | 10.367983 | 17.165282 |
| C  | 7.606401  | 11.024556 | 12.458556 | H  | 5.517897  | 15.460261 | 5.360046  |
| C  | 7.233212  | 9.810442  | 13.129648 | H  | 8.429877  | 16.134363 | 4.704083  |
| C  | 7.055118  | 8.626476  | 12.347290 | H  | 7.541099  | 14.683274 | 4.216104  |
| N  | 7.160802  | 8.705564  | 10.966976 | H  | 7.646352  | 16.401251 | 2.372756  |
| N  | 7.308663  | 13.529765 | 11.273184 | H  | 5.993113  | 16.045318 | 2.844905  |
| C  | 8.064596  | 13.438208 | 12.442914 | H  | 7.633753  | 18.485484 | 3.723866  |
| C  | 8.290279  | 12.157983 | 13.030634 | H  | 6.270986  | 18.500967 | 2.612808  |
| C  | 6.775065  | 7.396528  | 12.976415 | H  | 5.590766  | 19.228317 | 4.925333  |
| C  | 6.597039  | 7.359082  | 14.346516 | H  | 4.729410  | 17.783339 | 4.415891  |
| C  | 6.651582  | 8.519204  | 15.131401 | H  | 7.167073  | 17.882048 | 6.271174  |
| C  | 6.938538  | 9.737824  | 14.533445 | H  | 5.512900  | 17.509142 | 6.756735  |
| C  | 8.615208  | 14.591586 | 13.033001 | C  | 3.243404  | 14.480001 | 7.346942  |
| C  | 9.456661  | 14.463148 | 14.122972 | C  | 3.503713  | 13.395759 | 8.217586  |
| C  | 9.797316  | 13.209262 | 14.648595 | C  | 3.018885  | 12.778927 | 5.045857  |
| C  | 9.239128  | 12.061660 | 14.101412 | C  | 3.013962  | 11.730163 | 5.947727  |
| C  | 7.290584  | 7.479970  | 10.167591 | C  | 2.122548  | 14.000584 | 5.086460  |
| C  | 6.336228  | 14.643762 | 11.108765 | C  | 2.047326  | 11.594600 | 7.113961  |
| C  | 4.981026  | 14.366480 | 11.782273 | C  | 1.979651  | 14.621401 | 6.496749  |
| C  | 4.990022  | 14.304317 | 13.313180 | C  | 2.615674  | 12.181302 | 8.427416  |
| O  | 9.581344  | 10.811222 | 14.477060 | H  | 3.556864  | 12.623978 | 4.113387  |
| C  | 10.595543 | 10.635659 | 15.465966 | H  | 3.566710  | 10.836941 | 5.666427  |
| O  | 6.891620  | 10.917592 | 15.186202 | H  | 4.152164  | 13.602191 | 9.068338  |
| C  | 6.556498  | 10.933104 | 16.574018 | H  | 3.732657  | 15.422631 | 7.588538  |
| Rh | 4.704882  | 13.155445 | 6.476766  | H  | 1.130822  | 13.759921 | 4.675674  |
| H  | 7.857613  | 7.703154  | 9.265008  | H  | 2.553755  | 14.746854 | 4.410494  |
| H  | 9.047036  | 14.375149 | 9.167039  | H  | 1.130427  | 14.176703 | 7.025832  |
| H  | 8.753996  | 16.312569 | 7.227218  | H  | 1.738233  | 15.684270 | 6.391537  |
| H  | 6.762963  | 11.341255 | 7.251541  | H  | 1.096084  | 12.073905 | 6.865521  |
| H  | 6.661926  | 9.155136  | 8.333489  | H  | 1.817724  | 10.534651 | 7.265438  |
| H  | 8.440283  | 15.568778 | 12.603317 | H  | 3.222512  | 11.414782 | 8.924456  |
| H  | 9.905447  | 15.353061 | 14.553423 | H  | 1.794572  | 12.417945 | 9.122240  |
| H  | 10.512889 | 13.146961 | 15.457659 | Cl | 6.230016  | 12.074003 | 4.939163  |
| H  | 6.435471  | 8.457115  | 16.189496 |    |           |           |           |

(aS)-(P)-4

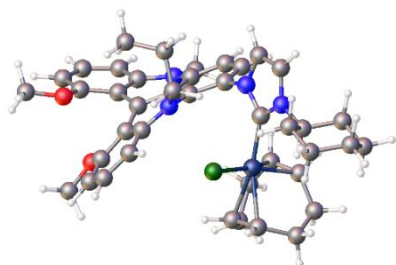

**Geometry optimization, B3LYP/6-311G\*\*, gas phase**

```
SCF Done: E(RB3LYP) = -2570.60039343
Zero-point correction= 0.835320 (Hartree/Particle)
Thermal correction to Energy= 0.881861
Thermal correction to Enthalpy= 0.882805
Thermal correction to Gibbs Free Energy= 0.755581
Sum of electronic and zero-point Energies= -2569.765073
Sum of electronic and thermal Energies= -2569.718533
Sum of electronic and thermal Enthalpies= -2569.717589
Sum of electronic and thermal Free Energies= -2569.844812
```

**Cartesian coordinates:**

|    |           |           |           |   |           |           |           |
|----|-----------|-----------|-----------|---|-----------|-----------|-----------|
| C  | 9.636595  | 11.448164 | 13.798418 | H | 6.853781  | 7.811693  | 8.957479  |
| C  | 8.614131  | 11.793097 | 12.852862 | H | 4.871021  | 14.318960 | 8.212979  |
| C  | 8.579161  | 13.128934 | 12.350137 | H | 5.853137  | 16.379540 | 6.678564  |
| C  | 9.426070  | 14.108639 | 12.898121 | H | 5.991813  | 11.743007 | 7.409546  |
| C  | 10.336804 | 13.749000 | 13.866418 | H | 5.735166  | 9.510072  | 8.358686  |
| C  | 10.467044 | 12.425617 | 14.311647 | H | 9.454772  | 15.102018 | 12.478788 |
| C  | 7.671946  | 10.856806 | 12.324639 | H | 11.017188 | 14.500081 | 14.250106 |
| C  | 7.198083  | 11.111362 | 11.014271 | H | 11.244664 | 12.177659 | 15.019049 |
| C  | 7.276025  | 12.439307 | 10.468710 | H | 6.474817  | 8.292864  | 16.043125 |
| N  | 7.708066  | 13.444335 | 11.313096 | H | 5.908602  | 6.382565  | 14.607917 |
| C  | 6.647817  | 10.038188 | 10.249371 | H | 5.927110  | 6.575349  | 12.176670 |
| C  | 6.187557  | 10.287248 | 8.955387  | H | 5.352079  | 7.380436  | 9.811002  |
| C  | 6.311595  | 11.561387 | 8.428873  | H | 6.924312  | 6.748385  | 10.355512 |
| C  | 6.858941  | 12.631765 | 9.133317  | H | 7.350190  | 15.259051 | 10.279046 |
| C  | 7.160148  | 9.683493  | 12.981614 | H | 7.604062  | 15.410808 | 11.989223 |
| C  | 6.688701  | 8.607145  | 12.177652 | H | 5.243597  | 15.810787 | 11.327281 |
| N  | 6.628745  | 8.772495  | 10.801820 | H | 5.088118  | 14.153299 | 10.791903 |
| C  | 6.276952  | 7.402232  | 12.774889 | H | 5.562230  | 13.349711 | 13.159611 |
| C  | 6.246756  | 7.305187  | 14.151104 | H | 4.152255  | 14.405630 | 13.087582 |
| C  | 6.581155  | 8.385699  | 14.972511 | H | 5.691993  | 15.032004 | 13.679936 |
| C  | 7.010256  | 9.574083  | 14.402271 | H | 11.795338 | 9.966768  | 14.520797 |
| N  | 6.985957  | 13.860744 | 8.410419  | H | 10.725806 | 8.619891  | 14.989494 |
| C  | 8.159087  | 14.400475 | 7.928036  | H | 10.714033 | 10.130056 | 15.936967 |
| N  | 7.750855  | 15.469587 | 7.196435  | H | 6.000185  | 10.461386 | 16.767151 |
| C  | 6.367969  | 15.593363 | 7.201668  | H | 7.277464  | 11.701639 | 16.851078 |
| C  | 5.880344  | 14.584666 | 7.952692  | H | 7.706376  | 9.979195  | 17.016352 |
| C  | 8.664192  | 16.405977 | 6.500592  | H | 9.661482  | 16.010528 | 6.708607  |
| C  | 8.424163  | 16.395683 | 4.984001  | H | 7.539689  | 18.194130 | 6.981058  |
| C  | 9.393852  | 17.354734 | 4.275887  | H | 8.792330  | 17.775067 | 8.158222  |
| C  | 9.308761  | 18.774222 | 4.853395  | H | 9.416812  | 19.782550 | 6.776065  |
| C  | 9.532355  | 18.773293 | 6.371471  | H | 10.562764 | 18.468783 | 6.590274  |
| C  | 8.565874  | 17.820146 | 7.090587  | H | 8.320575  | 19.196662 | 4.630671  |
| Rh | 10.111145 | 13.883300 | 8.274524  | H | 10.040757 | 19.422699 | 4.363649  |
| Cl | 10.201319 | 15.726579 | 9.853894  | H | 9.181085  | 17.363582 | 3.203142  |
| C  | 6.414732  | 7.610363  | 9.931785  | H | 10.418289 | 16.978063 | 4.386119  |
| C  | 7.110220  | 14.808059 | 11.235141 | H | 7.393287  | 16.704790 | 4.770648  |
| C  | 5.601940  | 14.793527 | 11.515443 | H | 8.537634  | 15.377659 | 4.598798  |
| C  | 5.233935  | 14.369336 | 12.940262 | H | 12.550245 | 14.959629 | 8.553204  |
| O  | 7.245146  | 10.695536 | 15.107326 | H | 12.021384 | 13.225139 | 10.072336 |
| C  | 7.040529  | 10.692497 | 16.522399 | H | 8.853899  | 11.654669 | 7.416743  |
| O  | 9.762491  | 10.133519 | 14.075791 | H | 9.624800  | 13.135827 | 5.729608  |
| C  | 10.818519 | 9.702308  | 14.935432 | H | 13.764210 | 13.515708 | 6.575247  |
| C  | 10.369643 | 12.785603 | 6.438699  | H | 12.632689 | 14.794569 | 6.199368  |
| C  | 11.804128 | 12.814189 | 5.915020  | H | 12.227419 | 11.806910 | 5.954990  |
| C  | 12.710808 | 13.811939 | 6.672218  | H | 11.789053 | 13.086193 | 4.856596  |
| C  | 12.349728 | 13.979843 | 8.132587  | H | 12.870115 | 11.311380 | 7.916794  |
| C  | 12.051326 | 12.985648 | 9.018607  | H | 12.447370 | 10.934054 | 9.566072  |
| C  | 12.111883 | 11.484962 | 8.683275  | H | 10.173697 | 10.622696 | 9.107103  |
| C  | 10.747954 | 10.922560 | 8.224158  | H | 10.896194 | 10.006865 | 7.633297  |
| C  | 9.906833  | 11.920563 | 7.451865  |   |           |           |           |

(aR)-(P)-5

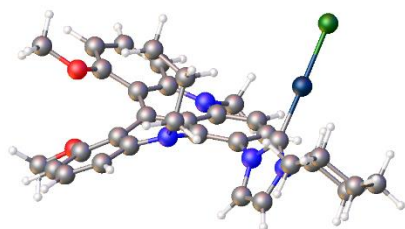

**Geometry optimization, B3LYP/6-311G\*\*, gas phase**

SCF Done: E(RB3LYP) = -2283.65094456  
Zero-point correction= 0.653123 (Hartree/Particle)  
Thermal correction to Energy= 0.692030  
Thermal correction to Enthalpy= 0.692975  
Thermal correction to Gibbs Free Energy= 0.579075  
Sum of electronic and zero-point Energies= -2282.997821  
Sum of electronic and thermal Energies= -2282.958914  
Sum of electronic and thermal Enthalpies= -2282.957970  
Sum of electronic and thermal Free Energies= -2283.071869

**Cartesian coordinates:**

|   |           |           |           |    |           |           |           |
|---|-----------|-----------|-----------|----|-----------|-----------|-----------|
| C | 6.390084  | 17.734871 | 6.530990  | Au | 4.580200  | 13.615655 | 7.257495  |
| C | 6.396468  | 16.301277 | 5.983199  | H  | 7.765287  | 7.662249  | 9.026707  |
| C | 7.022117  | 16.221349 | 4.583086  | H  | 9.524632  | 14.119794 | 8.674631  |
| C | 6.300001  | 17.173060 | 3.616460  | H  | 9.041336  | 16.246773 | 6.994175  |
| C | 6.278781  | 18.612236 | 4.148344  | H  | 6.882326  | 11.440341 | 7.133082  |
| C | 5.670044  | 18.679987 | 5.555741  | H  | 6.677362  | 9.228533  | 8.132992  |
| N | 7.063338  | 15.365704 | 6.921860  | H  | 8.856462  | 15.363145 | 12.594534 |
| C | 6.466596  | 14.283204 | 7.473700  | H  | 10.214416 | 14.998542 | 14.592036 |
| N | 7.438700  | 13.704292 | 8.248662  | H  | 10.612404 | 12.740541 | 15.469386 |
| C | 8.630088  | 14.421540 | 8.158731  | H  | 6.165580  | 8.355291  | 15.915354 |
| C | 8.386793  | 15.462320 | 7.330567  | H  | 6.006841  | 6.358085  | 14.496515 |
| C | 7.286814  | 12.470531 | 8.953934  | H  | 6.399905  | 6.473174  | 12.095038 |
| C | 7.453899  | 12.366896 | 10.342904 | H  | 6.168260  | 7.142160  | 9.617102  |
| C | 7.427894  | 11.059981 | 10.934260 | H  | 7.657883  | 6.665406  | 10.469436 |
| C | 7.141547  | 9.911093  | 10.137431 | H  | 7.040438  | 15.172076 | 10.069318 |
| C | 6.929914  | 10.067195 | 8.763096  | H  | 7.039459  | 15.363964 | 11.809042 |
| C | 7.020909  | 11.324876 | 8.200066  | H  | 4.767132  | 15.345473 | 10.832539 |
| C | 7.689866  | 10.908485 | 12.316343 | H  | 4.981649  | 13.714324 | 10.261212 |
| C | 7.203059  | 9.712097  | 12.937488 | H  | 5.244303  | 12.920584 | 12.679403 |
| C | 6.969933  | 8.566498  | 12.118124 | H  | 3.701472  | 13.722520 | 12.398891 |
| N | 7.129393  | 8.673925  | 10.745893 | H  | 5.004039  | 14.584470 | 13.222209 |
| N | 7.602824  | 13.455232 | 11.194032 | H  | 11.495581 | 10.596207 | 15.154978 |
| C | 8.312198  | 13.278245 | 12.380588 | H  | 10.528503 | 9.142950  | 15.514764 |
| C | 8.422862  | 11.974483 | 12.943067 | H  | 10.195353 | 10.663363 | 16.383824 |
| C | 6.576296  | 7.348207  | 12.700636 | H  | 5.377748  | 10.490626 | 16.447721 |
| C | 6.333534  | 7.293156  | 14.057164 | H  | 6.503977  | 11.852857 | 16.677557 |
| C | 6.436300  | 8.425330  | 14.872314 | H  | 7.056179  | 10.187517 | 16.994661 |
| C | 6.841257  | 9.630566  | 14.323998 | H  | 5.366934  | 15.939761 | 5.929622  |
| C | 8.930186  | 14.370670 | 13.013490 | H  | 8.083411  | 16.494127 | 4.638214  |
| C | 9.714854  | 14.156370 | 14.127765 | H  | 6.972473  | 15.191134 | 4.219143  |
| C | 9.936770  | 12.872382 | 14.637337 | H  | 6.784600  | 17.133242 | 2.637362  |
| C | 9.318792  | 11.783584 | 14.044560 | H  | 5.271599  | 16.822888 | 3.468545  |
| C | 7.170376  | 7.462527  | 9.914446  | H  | 7.302654  | 19.006452 | 4.175360  |
| C | 6.773464  | 14.684886 | 11.003918 | H  | 5.716666  | 19.255713 | 3.466295  |
| C | 5.267702  | 14.399494 | 11.064143 | H  | 5.711559  | 19.701756 | 5.942518  |
| C | 4.782032  | 13.876386 | 12.418003 | H  | 4.608755  | 18.408600 | 5.508803  |
| O | 9.550492  | 10.506214 | 14.400748 | H  | 7.421522  | 18.080772 | 6.673166  |
| C | 10.503804 | 10.226824 | 15.429559 | H  | 5.905059  | 17.750936 | 7.511605  |
| O | 6.855231  | 10.790860 | 15.003167 | Cl | 2.423452  | 12.796864 | 7.061038  |
| C | 6.418516  | 10.814755 | 16.365466 |    |           |           |           |



(aS)-(P)-5

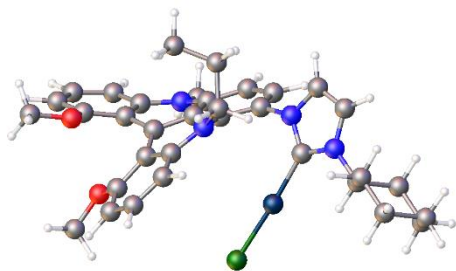

**Geometry optimization, B3LYP/6-311G\*\*, gas phase**

```
SCF Done: E(RB3LYP) = -2283.65329035
Zero-point correction= 0.653118 (Hartree/Particle)
Thermal correction to Energy= 0.692000
Thermal correction to Enthalpy= 0.692944
Thermal correction to Gibbs Free Energy= 0.579615
Sum of electronic and zero-point Energies= -2283.000172
Sum of electronic and thermal Energies= -2282.961291
Sum of electronic and thermal Enthalpies= -2282.960346
Sum of electronic and thermal Free Energies= -2283.073675
```

**Cartesian coordinates:**

|   |           |           |           |    |           |           |           |
|---|-----------|-----------|-----------|----|-----------|-----------|-----------|
| C | 5.705279  | 17.188865 | 6.429845  | Au | 5.566847  | 12.787256 | 6.334325  |
| C | 6.589975  | 16.085501 | 5.831291  | H  | 4.840397  | 10.063852 | 12.156259 |
| C | 7.619956  | 16.645902 | 4.841131  | H  | 9.186451  | 14.731715 | 9.464313  |
| C | 6.917817  | 17.448726 | 3.733404  | H  | 8.600300  | 16.766786 | 7.708161  |
| C | 6.027269  | 18.555949 | 4.313608  | H  | 6.859857  | 13.550719 | 10.720082 |
| C | 5.013206  | 17.989431 | 5.316040  | H  | 6.300495  | 11.585612 | 12.052810 |
| N | 7.236502  | 15.288276 | 6.902459  | H  | 8.701743  | 10.731196 | 4.589570  |
| C | 6.902911  | 14.013230 | 7.208587  | H  | 7.908668  | 8.840334  | 3.276239  |
| N | 7.697506  | 13.689079 | 8.280056  | H  | 6.691721  | 6.982209  | 4.316266  |
| C | 8.492556  | 14.773225 | 8.643078  | H  | 8.303840  | 4.344357  | 9.764102  |
| C | 8.202732  | 15.769741 | 7.775623  | H  | 7.063049  | 4.613281  | 11.865581 |
| C | 7.561108  | 12.471631 | 9.021663  | H  | 6.184329  | 6.782017  | 12.550905 |
| C | 7.795683  | 11.205195 | 8.455016  | H  | 6.020430  | 9.258561  | 13.220306 |
| C | 7.354579  | 10.048548 | 9.174438  | H  | 4.799635  | 8.316640  | 12.329941 |
| C | 6.800997  | 10.178785 | 10.482617 | H  | 9.185033  | 12.864139 | 6.564425  |
| C | 6.683072  | 11.451804 | 11.052693 | H  | 9.967058  | 11.437671 | 5.914951  |
| C | 7.033823  | 12.563417 | 10.308818 | H  | 11.401861 | 12.695583 | 7.485932  |
| C | 7.425038  | 8.771430  | 8.564099  | H  | 10.306708 | 12.354356 | 8.805618  |
| C | 7.384692  | 7.635670  | 9.441810  | H  | 10.715989 | 9.862424  | 8.493262  |
| C | 6.783941  | 7.789281  | 10.725837 | H  | 12.204553 | 10.743411 | 8.833006  |
| N | 6.348410  | 9.044959  | 11.123126 | H  | 11.840580 | 10.234966 | 7.183282  |
| N | 8.442030  | 10.995619 | 7.250070  | H  | 4.759376  | 6.372328  | 5.527050  |
| C | 8.092151  | 9.884102  | 6.487381  | H  | 4.892695  | 5.274115  | 6.925274  |
| C | 7.508778  | 8.755379  | 7.135106  | H  | 6.102140  | 5.188881  | 5.619000  |
| C | 6.641287  | 6.680566  | 11.578990 | H  | 10.126756 | 4.830048  | 8.420904  |
| C | 7.159087  | 5.460216  | 11.196501 | H  | 9.938327  | 5.359264  | 6.729314  |
| C | 7.855651  | 5.299272  | 9.995014  | H  | 8.691222  | 4.326560  | 7.475523  |
| C | 7.995348  | 6.375321  | 9.133403  | H  | 5.952345  | 15.367891 | 5.309679  |
| C | 8.283125  | 9.875921  | 5.097033  | H  | 8.323792  | 17.301797 | 5.367813  |
| C | 7.805607  | 8.815963  | 4.354483  | H  | 8.202806  | 15.825266 | 4.412001  |
| C | 7.120209  | 7.749334  | 4.943879  | H  | 7.668649  | 17.872790 | 3.061338  |
| C | 6.949426  | 7.719375  | 6.316503  | H  | 6.306666  | 16.768682 | 3.128127  |
| C | 5.459395  | 9.179242  | 12.284905 | H  | 6.655306  | 19.303926 | 4.813953  |
| C | 9.560910  | 11.875530 | 6.822081  | H  | 5.506430  | 19.078145 | 3.506573  |
| C | 10.687026 | 11.955931 | 7.861010  | H  | 4.422558  | 18.794868 | 5.760396  |
| C | 11.399059 | 10.622740 | 8.105625  | H  | 4.304597  | 17.337840 | 4.791267  |
| O | 6.217729  | 6.791375  | 6.959025  | H  | 6.322937  | 17.864025 | 7.035170  |
| C | 5.451906  | 5.854017  | 6.194701  | H  | 4.966215  | 16.739639 | 7.099239  |
| O | 8.744694  | 6.342926  | 8.018057  | Cl | 4.090336  | 11.272309 | 5.374271  |
| C | 9.410039  | 5.131504  | 7.652085  |    |           |           |           |

(aR)-(P)-6

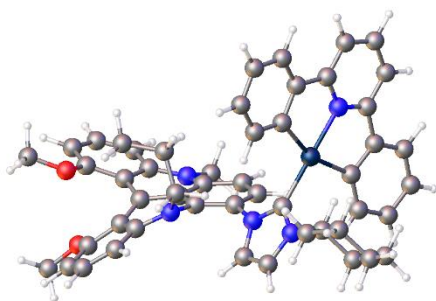

**Geometry optimization, B3LYP/6-311G\*\*, gas phase**

SCF Done: E(RB3LYP) = -2532.44697213  
Zero-point correction= 0.881867 (Hartree/Particle)  
Thermal correction to Energy= 0.932351  
Thermal correction to Enthalpy= 0.933295  
Thermal correction to Gibbs Free Energy= 0.796156  
Sum of electronic and zero-point Energies= -2531.565106  
Sum of electronic and thermal Energies= -2531.514621  
Sum of electronic and thermal Enthalpies= -2531.513677  
Sum of electronic and thermal Free Energies= -2531.650816

**Cartesian coordinates:**

|    |           |           |           |   |           |           |           |
|----|-----------|-----------|-----------|---|-----------|-----------|-----------|
| C  | 2.889096  | 1.358985  | -4.423248 | C | -3.763945 | -3.609087 | -1.944496 |
| C  | 3.009564  | 1.126217  | -3.046168 | C | 0.626215  | 1.623755  | -2.491372 |
| C  | 4.290916  | 1.156972  | -2.424643 | C | 0.569325  | 2.912415  | -1.657136 |
| C  | 5.451329  | 1.230908  | -3.264017 | C | 1.596155  | 3.984673  | -2.030006 |
| C  | 5.308494  | 1.428650  | -4.629027 | C | 5.045189  | -0.964628 | 2.670266  |
| C  | 4.030161  | 1.517316  | -5.186921 | O | 5.763374  | 3.416371  | -1.502724 |
| N  | 1.878485  | 0.846441  | -2.270894 | C | 6.444152  | 4.635981  | -1.829371 |
| C  | 2.045864  | 0.147864  | -1.080710 | O | 6.632055  | 1.040187  | -2.654654 |
| C  | 3.287347  | 0.308566  | -0.386282 | C | 7.831901  | 0.987274  | -3.439280 |
| C  | 4.344956  | 1.036038  | -0.994092 | H | 4.592380  | -1.943235 | 2.533942  |
| C  | 3.481694  | -0.280389 | 0.897077  | H | 0.992773  | -1.743938 | -3.068206 |
| C  | 2.454366  | -1.059057 | 1.448490  | H | -1.518526 | -2.559396 | -3.843113 |
| C  | 1.298850  | -1.281305 | 0.726463  | H | 0.549604  | -1.942858 | 1.138323  |
| C  | 1.071469  | -0.703132 | -0.525062 | H | 2.552073  | -1.505878 | 2.425925  |
| C  | 5.352770  | 1.552111  | -0.120748 | H | 1.922220  | 1.353008  | -4.904265 |
| C  | 5.544685  | 0.919901  | 1.147467  | H | 3.933947  | 1.665933  | -6.255966 |
| N  | 4.692279  | -0.107116 | 1.527608  | H | 6.173767  | 1.490559  | -5.272316 |
| C  | 6.585346  | 1.334608  | 1.994400  | H | 7.731872  | 4.002983  | 0.237013  |
| C  | 7.368791  | 2.410612  | 1.628053  | H | 8.156653  | 2.739625  | 2.295169  |
| C  | 7.138334  | 3.125989  | 0.448825  | H | 6.747640  | 0.864801  | 2.951770  |
| C  | 6.129908  | 2.725804  | -0.411397 | H | 4.709949  | -0.534091 | 3.617473  |
| N  | -0.073063 | -1.137686 | -1.282616 | H | 6.123354  | -1.099234 | 2.694333  |
| C  | -1.376151 | -1.220480 | -0.874071 | H | -0.222339 | 0.990649  | -2.249727 |
| N  | -2.051557 | -1.793377 | -1.890588 | H | 0.557210  | 1.855514  | -3.551486 |
| C  | -1.186876 | -2.086573 | -2.935819 | H | -0.439754 | 3.316179  | -1.785275 |
| C  | 0.046650  | -1.687049 | -2.560715 | H | 0.652374  | 2.655814  | -0.595763 |
| Au | -2.196050 | -0.688818 | 0.914715  | H | 2.623601  | 3.659166  | -1.853617 |
| C  | -1.884653 | -2.494375 | 1.978980  | H | 1.431617  | 4.884042  | -1.432690 |
| C  | -2.356017 | -2.377486 | 3.315407  | H | 1.511060  | 4.268811  | -3.082595 |
| C  | -2.279820 | -3.470127 | 4.186251  | H | 7.783874  | 0.175090  | -4.168788 |
| C  | -1.751355 | -4.680978 | 3.748908  | H | 8.632353  | 0.794430  | -2.729357 |
| C  | -1.300082 | -4.807200 | 2.438797  | H | 8.011277  | 1.938130  | -3.947811 |
| C  | -1.368335 | -3.717763 | 1.562872  | H | 6.324760  | 5.373466  | -1.031925 |
| C  | -2.947115 | -1.087722 | 3.712299  | H | 5.968123  | 4.997045  | -2.737551 |
| N  | -2.992576 | -0.168269 | 2.717007  | H | 7.505319  | 4.453642  | -2.016635 |
| C  | -3.517900 | 1.075934  | 2.833960  | H | -3.885930 | -1.700477 | -0.957006 |
| C  | -4.035968 | 1.453684  | 4.072325  | H | -3.319841 | -4.030322 | -2.854254 |
| C  | -4.001032 | 0.543587  | 5.125256  | H | -3.273320 | -4.088191 | -1.092788 |
| C  | -3.462599 | -0.729417 | 4.957455  | H | -5.431915 | -4.979150 | -2.003461 |
| C  | -3.485796 | 1.861611  | 1.588773  | H | -5.694551 | -3.587090 | -0.970759 |
| C  | -4.050517 | 3.137807  | 1.489404  | H | -5.671302 | -3.583822 | -4.035854 |
| C  | -4.053156 | 3.811051  | 0.271632  | H | -7.075045 | -3.358969 | -3.009618 |
| C  | -3.496729 | 3.209324  | -0.852774 | H | -6.199906 | -1.168707 | -3.888911 |
| C  | -2.918978 | 1.938110  | -0.758228 | H | -6.171333 | -1.229669 | -2.137079 |
| C  | -2.893857 | 1.250532  | 0.449454  | H | -3.794358 | -1.687289 | -4.012271 |
| C  | -3.511828 | -2.094755 | -1.904906 | H | -4.041481 | -0.285225 | -2.971278 |
| C  | -4.217365 | -1.361563 | -3.054512 | H | -3.448156 | -1.430986 | 5.779465  |
| C  | -5.724696 | -1.664938 | -3.039221 | H | -4.403788 | 0.828881  | 6.089961  |
| C  | -6.000027 | -3.173819 | -3.072993 | H | -4.462658 | 2.436907  | 4.211350  |
| C  | -5.273484 | -3.900287 | -1.933898 | H | -1.015222 | -3.848863 | 0.545137  |

|   |           |           |           |   |           |           |          |
|---|-----------|-----------|-----------|---|-----------|-----------|----------|
| H | -0.899957 | -5.753676 | 2.092845  | H | -4.500171 | 4.794988  | 0.199922 |
| H | -1.701681 | -5.524168 | 4.426947  | H | -4.504120 | 3.608691  | 2.353706 |
| H | -2.500668 | 1.487817  | -1.651503 | H | -2.640375 | -3.389466 | 5.205146 |
| H | -3.517498 | 3.724727  | -1.806744 |   |           |           |          |

## TS-6

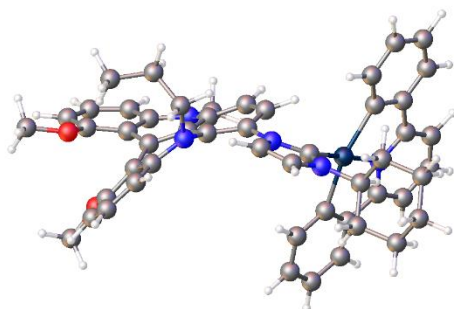

### Geometry optimization, B3LYP/6-311G\*\*, gas phase

```

SCF Done: E(RB3LYP) = -2532.42649571
Zero-point correction=
Thermal correction to Energy=
Thermal correction to Enthalpy=
Thermal correction to Gibbs Free Energy=
Sum of electronic and zero-point Energies=
Sum of electronic and thermal Energies=
Sum of electronic and thermal Enthalpies=
Sum of electronic and thermal Free Energies=
0.881091 (Hartree/Particle)
0.930780
0.931724
0.797269
-2531.545405
-2531.495716
-2531.494772
-2531.629226

```

### Cartesian coordinates:

|    |           |           |           |   |           |           |           |
|----|-----------|-----------|-----------|---|-----------|-----------|-----------|
| C  | 0.101750  | -0.784015 | 0.149775  | C | -7.243525 | 1.112809  | 5.158227  |
| C  | -0.058263 | -0.308344 | 1.456786  | C | -6.798777 | 0.053387  | 5.953021  |
| C  | 1.000407  | -0.418705 | 2.393536  | C | -7.058992 | -2.348716 | 2.717583  |
| C  | 2.118566  | -1.246948 | 2.049508  | C | -8.272541 | -1.631744 | 2.138506  |
| C  | 2.243321  | -1.750152 | 0.778841  | C | -9.548790 | -2.485868 | 2.311364  |
| C  | 1.240703  | -1.495649 | -0.173910 | C | -9.372392 | -3.870625 | 1.685687  |
| N  | -1.277045 | 0.314928  | 1.839152  | C | -8.125945 | -4.592276 | 2.259396  |
| C  | -1.578996 | 0.282812  | 3.206438  | C | -6.862499 | -3.752288 | 2.088107  |
| C  | -0.496867 | 0.424200  | 4.126679  | C | -1.737425 | 1.504812  | 1.053759  |
| C  | 0.831534  | 0.262916  | 3.666609  | C | -0.904983 | 2.791830  | 1.266047  |
| C  | -0.763434 | 0.692448  | 5.492904  | C | 0.443828  | 2.876562  | 0.581583  |
| C  | -2.089479 | 0.866848  | 5.899369  | C | 0.047818  | 0.740735  | 7.812176  |
| C  | -3.131444 | 0.611097  | 5.014096  | O | 3.302972  | 1.218853  | 2.682441  |
| C  | -2.895253 | 0.189496  | 3.688467  | C | 4.546007  | 1.662442  | 2.100606  |
| C  | 1.870420  | 0.781699  | 4.497761  | O | 2.988963  | -1.514094 | 3.054050  |
| C  | 1.582788  | 0.996071  | 5.883498  | C | 4.061641  | -2.427649 | 2.836686  |
| N  | 0.295519  | 0.796624  | 6.359213  | H | -0.858986 | 0.181265  | 7.995383  |
| C  | 2.617934  | 1.386150  | 6.771550  | H | -3.460074 | -0.054620 | 0.868039  |
| C  | 3.868868  | 1.664315  | 6.269737  | H | -5.726138 | -1.439050 | 0.388961  |
| C  | 4.152670  | 1.585797  | 4.891751  | H | -4.139501 | 0.753091  | 5.369796  |
| C  | 3.156711  | 1.189791  | 4.016824  | H | -2.334685 | 1.228212  | 6.891574  |
| N  | -4.002898 | -0.377260 | 2.956992  | H | -0.688245 | -0.652984 | -0.574369 |
| C  | -5.042511 | -1.074922 | 3.555378  | H | 1.359820  | -1.887449 | -1.173749 |
| N  | -5.812862 | -1.530041 | 2.565227  | H | 3.079001  | -2.364631 | 0.496806  |
| C  | -5.280344 | -1.181366 | 1.330133  | H | 5.127856  | 1.890142  | 4.544680  |
| C  | -4.144001 | -0.463145 | 1.567853  | H | 4.656937  | 1.983530  | 6.941319  |
| Au | -5.435848 | -1.495732 | 5.526455  | H | 2.409664  | 1.541608  | 7.833194  |
| C  | -4.254778 | -3.241927 | 5.755539  | H | -0.047345 | 1.741294  | 8.240570  |
| C  | -4.421513 | -3.795086 | 7.053922  | H | 0.877294  | 0.225366  | 8.315161  |
| C  | -3.745152 | -4.977651 | 7.408720  | H | -2.751084 | 1.720403  | 1.373516  |
| C  | -2.886903 | -5.596762 | 6.493387  | H | -1.748006 | 1.232768  | 0.007774  |
| C  | -2.721107 | -5.059098 | 5.221347  | H | -1.537057 | 3.610210  | 0.886843  |
| C  | -3.392487 | -3.876839 | 4.858396  | H | -0.812701 | 2.983443  | 2.345545  |
| C  | -5.349213 | -3.100713 | 7.971989  | H | 1.177222  | 2.164407  | 0.975254  |
| C  | -5.907658 | -1.977858 | 7.434633  | H | 0.863020  | 3.878309  | 0.681432  |
| C  | -6.818106 | -1.189816 | 8.076538  | H | 0.364962  | 2.676109  | -0.495599 |
| C  | -7.164325 | -1.542801 | 9.373200  | H | 3.700647  | -3.409265 | 2.539491  |
| C  | -6.611785 | -2.661633 | 9.967205  | H | 4.585162  | -2.511325 | 3.792911  |
| C  | -5.705851 | -3.469394 | 9.267729  | H | 4.751900  | -2.037919 | 2.060632  |
| C  | -7.302918 | -0.051791 | 7.263221  | H | 4.760293  | 2.689855  | 2.387952  |
| C  | -8.206624 | 0.876490  | 7.773198  | H | 4.420047  | 1.602751  | 1.026807  |
| C  | -8.637299 | 1.928184  | 6.960216  | H | 5.386587  | 0.995905  | 2.413162  |
| C  | -8.147140 | 2.058178  | 5.656213  | H | -7.183920 | -2.468113 | 3.791819  |

|   |            |           |          |   |           |           |           |
|---|------------|-----------|----------|---|-----------|-----------|-----------|
| H | -6.630737  | -3.643507 | 1.027528 | H | -6.886906 | -2.953436 | 10.972859 |
| H | -6.000080  | -4.250250 | 2.549960 | H | -7.894160 | -0.932361 | 9.932259  |
| H | -7.991884  | -5.565102 | 1.783373 | H | -3.242148 | -3.476856 | 3.860601  |
| H | -8.293583  | -4.808971 | 3.324986 | H | -2.077890 | -5.535811 | 4.518268  |
| H | -9.262126  | -3.792570 | 0.600049 | H | -2.382833 | -6.493844 | 6.783523  |
| H | -10.272542 | -4.477211 | 1.870698 | H | -6.866901 | 1.244898  | 4.131846  |
| H | -10.380907 | -1.965613 | 1.859415 | H | -8.498346 | 2.876963  | 5.027503  |
| H | -9.766183  | -2.565205 | 3.370930 | H | -9.359332 | 2.654292  | 7.332798  |
| H | -8.123381  | -1.424274 | 1.072638 | H | -8.609156 | 0.799061  | 8.769218  |
| H | -8.405592  | -0.660397 | 2.626234 | H | -3.876884 | -5.393109 | 8.394562  |
| H | -5.281014  | -4.335417 | 9.731127 |   |           |           |           |

(aS)-(P)-6

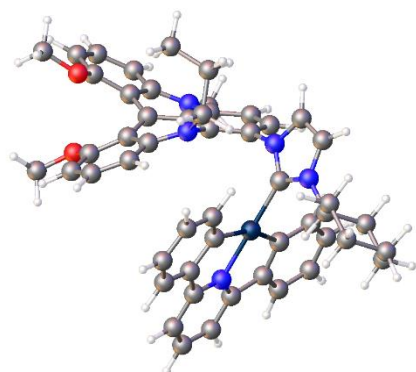

**Geometry optimization, B3LYP/6-311G\*\*, gas phase**

SCF Done: E(RB3LYP) = -2532.44612423  
 Zero-point correction= 0.881488 (Hartree/Particle)  
 Thermal correction to Energy= 0.932072  
 Thermal correction to Enthalpy= 0.933016  
 Thermal correction to Gibbs Free Energy= 0.795196  
 Sum of electronic and zero-point Energies= -2531.564637  
 Sum of electronic and thermal Energies= -2531.514053  
 Sum of electronic and thermal Enthalpies= -2531.513109  
 Sum of electronic and thermal Free Energies= -2531.650928

**Cartesian coordinates:**

|    |           |           |           |   |           |           |           |
|----|-----------|-----------|-----------|---|-----------|-----------|-----------|
| C  | 2.959025  | -1.659775 | -1.677179 | N | -1.239734 | -2.081933 | 1.748071  |
| C  | 2.775119  | -0.325263 | -1.285903 | C | -1.578596 | -1.596332 | 2.967276  |
| C  | 3.679106  | 0.278675  | -0.366186 | C | -1.347528 | -2.405094 | 4.080237  |
| C  | 4.659157  | -0.552067 | 0.272229  | C | -0.791650 | -3.667602 | 3.894110  |
| C  | 4.811970  | -1.872134 | -0.119974 | C | -0.468426 | -4.130702 | 2.620948  |
| C  | 3.973923  | -2.401853 | -1.105601 | C | -2.184357 | -0.254560 | 2.933589  |
| N  | 1.701904  | 0.421311  | -1.784456 | C | -2.656040 | 0.387649  | 4.083890  |
| C  | 1.242865  | 1.504721  | -1.052143 | C | -3.274192 | 1.630660  | 3.989290  |
| C  | 2.186521  | 2.182209  | -0.206942 | C | -3.429596 | 2.234182  | 2.744843  |
| C  | 3.503765  | 1.671438  | -0.069317 | C | -2.952759 | 1.602258  | 1.591201  |
| C  | 1.822027  | 3.373031  | 0.489281  | C | -2.320740 | 0.366171  | 1.661546  |
| C  | 0.519359  | 3.872490  | 0.357828  | C | -3.991962 | -0.782161 | -2.312344 |
| C  | -0.387093 | 3.191257  | -0.425807 | C | -5.281848 | -0.135096 | -1.784528 |
| C  | -0.066720 | 2.018735  | -1.115377 | C | -6.412593 | -1.173277 | -1.704375 |
| C  | 4.511945  | 2.593175  | 0.357656  | C | -6.633910 | -1.876084 | -3.049805 |
| C  | 4.110626  | 3.742157  | 1.105245  | C | -5.334738 | -2.500694 | -3.575237 |
| N  | 2.756815  | 3.983522  | 1.292970  | C | -4.204558 | -1.461809 | -3.671381 |
| C  | 5.074094  | 4.616203  | 1.634123  | C | 1.274917  | 0.234843  | -3.200181 |
| C  | 6.408070  | 4.404586  | 1.347789  | C | 1.702239  | 1.397484  | -4.107180 |
| C  | 6.829280  | 3.361701  | 0.516905  | C | 3.217304  | 1.537129  | -4.278213 |
| C  | 5.899064  | 2.474210  | 0.002260  | C | 2.322324  | 4.990510  | 2.273925  |
| N  | -1.148806 | 1.411503  | -1.848414 | O | 6.195699  | 1.516021  | -0.890020 |
| C  | -1.883919 | 0.325024  | -1.469197 | C | 7.540079  | 1.394789  | -1.376211 |
| N  | -2.885822 | 0.218536  | -2.365369 | O | 5.341531  | 0.012135  | 1.282434  |
| C  | -2.805584 | 1.246162  | -3.295657 | C | 6.286598  | -0.771922 | 2.021191  |
| C  | -1.725798 | 1.993109  | -2.976928 | H | 1.329864  | 4.731053  | 2.633481  |
| Au | -1.569700 | -0.881599 | 0.133458  | H | -1.309117 | 2.868921  | -3.442578 |
| C  | -0.801310 | -2.594860 | -0.844471 | H | -3.515010 | 1.358273  | -4.095985 |
| C  | -0.469949 | -3.606743 | 0.097730  | H | -1.397327 | 3.571807  | -0.510491 |
| C  | 0.020967  | -4.842549 | -0.338232 | H | 0.216514  | 4.788639  | 0.840541  |
| C  | 0.177223  | -5.096055 | -1.697698 | H | 2.270168  | -2.138049 | -2.356234 |
| C  | -0.160692 | -4.116765 | -2.627651 | H | 4.092461  | -3.439973 | -1.392499 |
| C  | -0.643570 | -2.875494 | -2.197853 | H | 5.552053  | -2.505662 | 0.346292  |
| C  | -0.706459 | -3.307101 | 1.521390  | H | 7.874920  | 3.277449  | 0.260489  |

|   |           |           |           |   |           |           |           |
|---|-----------|-----------|-----------|---|-----------|-----------|-----------|
| H | 7.146491  | 5.094526  | 1.738591  | H | -5.495059 | -2.948095 | -4.559132 |
| H | 4.787291  | 5.483012  | 2.208564  | H | -5.021927 | -3.315671 | -2.911353 |
| H | 2.305916  | 5.994806  | 1.842496  | H | -7.012424 | -1.152178 | -3.781720 |
| H | 2.998711  | 4.972732  | 3.124439  | H | -7.404156 | -2.644552 | -2.948988 |
| H | 0.200695  | 0.080873  | -3.243563 | H | -7.329977 | -0.680978 | -1.372653 |
| H | 1.740622  | -0.679645 | -3.553553 | H | -6.166120 | -1.917579 | -0.937301 |
| H | 1.236592  | 1.219004  | -5.082205 | H | -5.578701 | 0.678498  | -2.457463 |
| H | 1.279596  | 2.336800  | -3.735974 | H | -5.097425 | 0.309543  | -0.802277 |
| H | 3.721878  | 1.735095  | -3.329100 | H | -0.048289 | -5.117467 | 2.486903  |
| H | 3.451061  | 2.362472  | -4.953412 | H | -0.614390 | -4.303658 | 4.753395  |
| H | 3.651754  | 0.628737  | -4.704317 | H | -1.604692 | -2.059962 | 5.071649  |
| H | 5.796179  | -1.621565 | 2.503247  | H | -0.908300 | -2.134893 | -2.944153 |
| H | 6.687312  | -0.103056 | 2.778876  | H | -0.059523 | -4.320561 | -3.688116 |
| H | 7.095571  | -1.124226 | 1.375797  | H | 0.544799  | -6.059838 | -2.028545 |
| H | 7.854834  | 2.311662  | -1.880571 | H | -3.099728 | 2.086941  | 0.632644  |
| H | 7.515527  | 0.574179  | -2.088818 | H | -3.930721 | 3.192784  | 2.668168  |
| H | 8.231652  | 1.157170  | -0.563900 | H | -3.646076 | 2.117620  | 4.882482  |
| H | -3.650503 | -1.534624 | -1.597473 | H | -2.559063 | -0.080768 | 5.056452  |
| H | -4.476175 | -0.713337 | -4.424511 | H | 0.268946  | -5.620220 | 0.374855  |
| H | -3.275491 | -1.933878 | -4.003399 |   |           |           |           |

## References

- 1 C. Herse, D. Bas, F. C. Krebs, T. Burgi, J. Weber, T. Wesolowski, B. W. Laursen and J. Lacour, *Angew. Chem. Int. Ed.*, 2003, **42**, 3162-3166.
- 2 B. Laleu, P. Mobian, C. Herse, B. W. Laursen, G. Hopfgartner, G. Bernardinelli and J. Lacour, *Angew. Chem. Int. Ed.*, 2005, **44**, 1879-1883.
- 3 I. H. Delgado, S. Pascal, A. Wallabregue, R. Duwald, C. Besnard, L. Guenee, C. Nancoz, E. Vauthey, R. C. Tovar, J. L. Lunkley, G. Muller and J. Lacour, *Chem Sci*, 2016, **7**, 4685-4693.
- 4 K.-H. Wong, K.-K. Cheung, M. C.-W. Chan and C.-M. Che, *Organometallics*, 1998, **17**, 3505-3511.
- 5 F. Zinna, T. Bruhn, C. A. Guido, J. Ahrens, M. Bröring, L. Di Bari and G. Pescitelli, *Chem. Eur. J.*, 2016, **22**, 16089-16098.
- 6 Dowex® 1x2 chloride form, 100-200 mesh (Sigma-Aldrich, ref: 217387-100g). The resin was previously activated by washing with HCl 37% and neutralization with milli-Q water until pH = 7.
- 7 (a) A. D. Becke, *J. Chem. Phys.*, 1993, **98**, 5648-5652; (b) C. Lee, W. Yang and R. G. Parr, *Phys. Rev. B: Condens. Matter*, 1988, **37**, 785-789.
- 8 X. Li and M. J. Frisch, *J. Chem. Theory Comput.*, 2006, **2**, 835-839.
- 9 (a) S. H. Vosko, L. Wilk and M. Nusair, *Can J Phys*, 1980, **58**, 1200-1211; (b) A. D. McLean and G. S. Chandler, *J. Chem. Phys.*, 1980, **72**, 5639-5648.
- 10 (a) H. P. Hratchian and H. B. Schlegel, *J. Chem. Theory Comput.*, 2005, **1**, 61-69; (b) H. P. Hratchian and H. B. Schlegel, *J. Chem. Phys.*, 2004, **120**, 9918-9924; (c) K. Fukui, *Acc. Chem. Res.*, 1981, **14**, 363-368.
- 11 M. J. Frisch, G. W. Trucks, H. B. Schlegel, G. E. Scuseria, M. A. Robb, J. R. Cheeseman, G. Scalmani, V. Barone, B. Mennucci, G. A. Petersson, H. Nakatsuji, M. Caricato, X. Li, H. P. Hratchian, A. F. Izmaylov, J. Bloino, G. Zheng, J. L. Sonnenberg, M. Hada, M. Ehara, K. Toyota, R. Fukuda, J. Hasegawa, M. Ishida, T. Nakajima, Y. Honda, O. Kitao, H. Nakai, T. Vreven, J. A. Montgomery Jr., J. E. Peralta, F. Ogliaro, M. J. Bearpark, J. Heyd, E. N. Brothers, K. N. Kudin, V. N. Staroverov, R. Kobayashi, J. Normand, K. Raghavachari, A. P. Rendell, J. C. Burant, S. S. Iyengar, J. Tomasi, M. Cossi, N. Rega, N. J. Millam, M. Klene, J. E. Knox, J. B. Cross, V. Bakken, C. Adamo, J. Jaramillo, R. Gomperts, R. E. Stratmann, O. Yazyev, A. J. Austin, R. Cammi, C. Pomelli, J. W. Ochterski, R. L. Martin, K. Morokuma, V. G. Zakrzewski, G. A. Voth, P. Salvador, J. J. Dannenberg, S. Dapprich, A. D. Daniels, Ö. Farkas, J. B. Foresman, J. V. Ortiz, J. Cioslowski and D. J. Fox, Gaussian, Inc., Wallingford, CT, USA, 2009.
- 12 (a) M. Oki, *Top. Stereochem.*, 1983, **14**, 1-81; (b) M. Oki, *The chemistry of rotational isomers*, Springer Science & Business Media, 2012.
- 13 L. Falivene, Z. Cao, A. Petta, L. Serra, A. Poater, R. Oliva, V. Scarano and L. Cavallo, *Nature Chem.*, 2019, **11**, 872-879.
- 14 D. J. Nelson and S. P. Nolan, *Chem. Soc. Rev.*, 2013, **42**, 6723-6753.
- 15 G. Sheldrick, *Acta Crystallogr., Sect. A*, 2015, **71**, 3-8.
- 16 G. Sheldrick, *Acta Crystallogr., Sect. C*, 2015, **71**, 3-8.
